# Supplementary material for: m6A modification patterns and tumor immune landscape in clear cell renal carcinoma
Source: HighWire-hosted journal article supplement (doi:10.1136/jitc-2020-001646), 2021-02-01
Supplement: jitc-2020-001646supp001_data_supplement.xlsx [file jitc-2020-001646supp001_data_supplement.xlsx]

## Sheet: S1
Table-S1: Tumor immune landscape of 513 ccRCC patients with survival information
AliquotBarcode	SampleBarcode	TCGA.Participant.Barcode	Age	Gender	Grade	Stage	T	M	N	m6Acluster	Immune.Subtype	m6Ascore	OS.Status	OS.Time	PFS.Status	PFS.Time	Proliferation	Intratumor.Heterogeneity	Aneuploidy.Score	Th17.Cells	Th1.Cells	Th2.Cells	Leukocyte.Fraction	SNV.Neoantigens	Indel.Neoantigens	BCR.Evenness	TCR.Evenness	CTA.Score	Nonsilent.Mutation.Rate	Number.of.Segments	Fraction.Altered	Homologous.Recombination.Defects	LOH_n_seg	LOH_frac_altered	B.Cells.Memory	B.Cells.Naive	Dendritic.Cells.Activated	Dendritic.Cells.Resting	Eosinophils	Macrophages.M0	Macrophages.M1	Macrophages.M2	Mast.Cells.Activated	Mast.Cells.Resting	Monocytes	Neutrophils	NK.Cells.Activated	NK.Cells.Resting	Plasma.Cells
TCGA-A3-3308-01A-02R-1325-07	TCGA-A3-3308-01A	TCGA-A3-3308	77	FEMALE	G2	Stage III	T3b	M0	N0	C1	C3	low	0	16	0	16	-0.752	0.04	3	568.158	2.95382	-528.275	0.238994	32	102	NA	0.989151	2.06113	1.9159	114	0.0846483	6	6	4	0	0.0327372	0	0	0	0.0367706	0.0715552	0.44455	0	0.027088	0.0610901	0	0	0.036953	0.0265454
TCGA-A3-3311-01A-02R-1325-07	TCGA-A3-3311-01A	TCGA-A3-3311	57	MALE	G2	Stage I	T1	M0	NX	C1	C3	low	1	1191	0	1191	-0.8553	0.1	1	1426.96	826.196	-645.846	0.2709	29	21	0.924791	0.890982	2.2492	1.2659	129	0.175428	7	7	5	0	0.0999938	0	6.05e-05	0	0	0.0687009	0.340469	0.00459108	0	0.0765255	0.00815829	0.00836327	0	0.0276384
TCGA-A3-3347-01A-02R-1325-07	TCGA-A3-3347-01A	TCGA-A3-3347	76	FEMALE	G2	Stage III	T1b	M0	N1	C1	C3	high	1	1610	1	610	-0.1883	0.53	9	642.213	84.657	-24.9392	0.296441	21	81	0.935968	0.9375	1.76425	0.787652	69	0.390923	5	5	6	0.0179528	0.013115	0	0.00033269	0	0.210438	0.0283263	0.430227	0	0.0311899	0	0.0168873	0	0.0199849	0
TCGA-A3-3357-01A-02R-1420-07	TCGA-A3-3357-01A	TCGA-A3-3357	62	MALE	G3	Stage II	T2	M0	N0	C1	C3	low	0	2688	0	2688	-0.9829	0	5	2959.84	301.567	-1182.9	0.245625	22	1	NA	0.87252	1.29577	2.1524	155	0.149345	7	7	7	0	0.00779313	0.0049956	0	0	0	0.00717462	0.541497	0	0.0433684	0.0533283	0.0107278	0.0206085	0	0.00163357
TCGA-A3-3378-01A-02R-1325-07	TCGA-A3-3378-01A	TCGA-A3-3378	60	MALE	G3	Stage I	T1	M0	N0	C1	C3	low	0	630	0	630	-0.6717	0	1	3023.4	90.6422	-547.037	0.517196	25	3	0.793364	0.967129	1.87209	1.26565	61	0.063069	3	3	3	0	0.0381775	0	0.00160752	0	0	0.0480432	0.297378	0	0.0258946	0.0393491	0.0771855	0.0183842	0	0.0192771
TCGA-A3-3387-01A-01R-1541-07	TCGA-A3-3387-01A	TCGA-A3-3387	49	MALE	G2	Stage I	T1a	M0	N0	C1	C3	low	0	617	0	617	-0.5883	0.29	2	589.306	237.743	-591.043	0.302846	44	43	0.789448	0.979517	2.19946	2.10571	69	0.30237	4	4	7	0	0.078596	0.00889519	0.00759425	0	0	0.017108	0.400589	0	0.0402912	0.0523205	0.0262023	0	0.0140233	0.0273453
TCGA-AK-3431-01A-02R-1277-07	TCGA-AK-3431-01A	TCGA-AK-3431	62	FEMALE	G3	Stage II	T2	M0	NX	C1	C3	low	1	2241	0	2241	-1.1507	NA	1	196.277	257.11	-75.4523	0.180176	NA	NA	NA	0.914937	1.73188	NA	54	0.0425828	5	5	4	0	0.023437	0	0	0	0	0.0289676	0.356854	0	0.0308356	0.106322	0.00384058	0.00151349	0.0780723	0.000181515
TCGA-AK-3454-01A-02R-1277-07	TCGA-AK-3454-01A	TCGA-AK-3454	84	MALE	G3	Stage I	T1b	M0	NX	C1	C3	high	0	874	0	874	-1.2809	NA	1	3127.46	927.533	-1207.3	0.169385	NA	NA	NA	0.954644	1.26125	NA	95	0.12005	11	11	12	0.00355961	0.0130857	0.00187007	0	0	0	0.0619231	0.24665	0.0102354	0.0120668	0.056098	0.00234274	0.0337004	0.0668417	0.0402706
TCGA-AK-3455-01A-01R-0864-07	TCGA-AK-3455-01A	TCGA-AK-3455	71	FEMALE	G3	Stage III	T3b	M0	NX	C1	C2	low	1	683	0	683	-1.4021	0	2	2669.76	856.153	-1036.22	0.282271	32	32	0.78663	0.836825	2.15321	1.50826	95	0.100649	3	3	7	0	0.028904	0	0	0	0.00120655	0.0563277	0.0236726	0	0.000480128	0.0115003	0.000547291	0.0989587	0	0.094219
TCGA-B0-4694-01A-01R-1277-07	TCGA-B0-4694-01A	TCGA-B0-4694	72	MALE	G4	Stage III	T3b	M0	NX	C1	C3	high	1	106	0	106	-1.1709	NA	5	1179.88	415.327	-1088.44	0.43382	NA	NA	0.822325	0.941766	2.01708	NA	68	0.172993	7	7	5	0	0.0394869	0	0	0	0.0569626	0.0608987	0.289722	0	0.00933254	0.0250082	0.0122088	0.0306338	0	0.0643994
TCGA-B0-4700-01A-02R-1541-07	TCGA-B0-4700-01A	TCGA-B0-4700	60	MALE	G4	Stage IV	T4	M1	NX	C1	C6	high	1	1980	1	1980	-0.3528	0.31	0	613.456	1308.7	-241.856	0.626299	7	1	0.951659	0.910479	1.74328	0.673966	86	0.0482376	0	0	19	0	0.0265304	0	0	0	0.072118	0.124188	0.162659	0	0.0101148	0	0	0.0816148	0	0.0169465
TCGA-B0-4701-01A-01R-1277-07	TCGA-B0-4701-01A	TCGA-B0-4701	66	FEMALE	G3	Stage IV	T3a	M1	N0	C1	C3	low	1	238	1	238	-0.7607	NA	0	817.43	176.523	-812.508	0.367586	NA	NA	0.863539	0.987366	2.05755	NA	101	0.0363868	5	5	3	0.0020817	0.0095479	0	0.00279798	0	0.00985824	0.108556	0.202768	0	0.051913	0.0342565	0	0.03282	0	0.0193198
TCGA-B0-4703-01A-01R-1277-07	TCGA-B0-4703-01A	TCGA-B0-4703	51	MALE	G4	Stage IV	T3a	M1	N0	C1	C6	high	1	182	1	182	-0.2388	NA	4	-1401.17	943.566	-49.6713	0.306968	NA	NA	NA	0.850291	1.75423	NA	99	0.198083	13	13	13	0	0.0171772	0	0	0	0	0.103664	0.273619	0.000424224	0.00870482	0.012581	0.00195941	0.0277142	0	0.0184884
TCGA-B0-4706-01A-01R-1503-07	TCGA-B0-4706-01A	TCGA-B0-4706	61	MALE	G4	Stage III	T3a	M0	NX	C1	C2	low	1	65	0	65	-0.8273	0	1	2899.69	98.1129	-1148.16	0.132438	21	5	NA	0.980767	1.90415	1.04223	95	0.0574672	6	6	19	0	0.0144343	0	0	0	0	0.0684496	0.0987205	0	0.0171495	0.0731284	0	0.0980892	0.0743814	0.0331029
TCGA-B0-4810-01A-01R-1503-07	TCGA-B0-4810-01A	TCGA-B0-4810	47	MALE	G3	Stage III	T3a	M0	N1	C1	C3	low	1	478	1	205	-0.5124	0.05	1	1701.58	590.445	-600.36	0.340024	9	65	0.815408	0.906622	2.02692	1.5279	90	0.0868982	7	7	11	0	0.0237631	0	0	0	0	0.0500939	0.221614	0	0.024005	0.0644855	0	0.0915712	0	0.0192404
TCGA-B0-4811-01A-01R-1503-07	TCGA-B0-4811-01A	TCGA-B0-4811	48	MALE	G3	Stage III	T3a	M0	N0	C1	C3	low	1	1417	1	458	-0.4813	0.04	25	1818.39	95.6846	-947.087	0.16272	25	35	NA	0.763873	3.33102	2.42646	69	0.623344	2	2	3	0.00686411	0	0	0.00687166	0	0	0.0954697	0.209925	0	0.0524865	0.0400241	0	0.0918671	0	0.0812007
TCGA-B0-4815-01A-01R-1503-07	TCGA-B0-4815-01A	TCGA-B0-4815	65	MALE	G4	Stage III	T3a	M0	NX	C1	C3	high	1	1588	1	1588	-0.2952	0.16	14	660.868	1145.65	-830.124	0.506399	31	6	0.748839	0.924355	2.30273	1.61673	61	0.475014	13	13	10	0.0378873	0	0	0	0	0.0108847	0.0796959	0.143956	0	0.0113488	1.1e-06	0.00757583	0.067675	0	0.117652
TCGA-B0-4817-01A-01R-1277-07	TCGA-B0-4817-01A	TCGA-B0-4817	81	MALE	G3	Stage III	T3c	M0	N0	C1	C3	high	1	1019	0	1019	-1.063	NA	4	984.386	577.599	-1447.47	0.742193	NA	NA	0.996839	0.967132	1.74517	NA	81	0.0917486	3	3	7	0.0188928	0	0	0	0	0.03026	0.0364653	0.0895364	0	0.0298772	0	0.412824	0.0886197	0	0.0695206
TCGA-B0-4819-01A-01R-1277-07	TCGA-B0-4819-01A	TCGA-B0-4819	60	FEMALE	G4	Stage IV	T3b	M1	NX	C1	C3	high	1	183	0	183	-0.9785	NA	0	-1619.68	1615.96	-522.123	0.555337	NA	NA	0.487916	0.911092	2.5699	NA	101	0.249795	2	2	0	0	0.0381237	0	0	0	0.0408895	0.0469303	0.109286	0	0	0.01718	0	0.100832	0	0.0536664
TCGA-B0-4822-01A-01R-1277-07	TCGA-B0-4822-01A	TCGA-B0-4822	78	MALE	G4	Stage II	T2	M0	NX	C1	C3	high	1	1111	1	1111	-0.8168	NA	25	2165.22	751.077	-649.831	0.304172	NA	NA	NA	0.974111	2.02567	NA	64	0.540479	2	2	2	0.00350929	0	0	0	0	0.0114966	0.0399847	0.368088	0	0.0234863	0.00738628	0	0.0480928	0	0.0603108
TCGA-B0-4828-01A-01R-1277-07	TCGA-B0-4828-01A	TCGA-B0-4828	79	MALE	G3	Stage IV	T2	M1	NX	C1	C3	low	1	307	1	307	-1.0197	NA	6	2553	323.112	-1266.18	0.0947753	NA	NA	NA	0.973741	1.95393	NA	123	0.560187	5	5	8	0	0.0352027	0.00237676	0	0	0	0.0391127	0.106678	0	0.00469914	0.120552	0	0.0338663	0.0446127	0.0559024
TCGA-B0-4836-01A-01R-1305-07	TCGA-B0-4836-01A	TCGA-B0-4836	61	MALE	G3	Stage IV	T3b	M1	NX	C1	C3	high	1	1238	1	1238	-0.4468	NA	13	1764.7	636.28	-288.044	0.266992	NA	NA	0.850567	0.941357	1.68636	NA	84	0.814754	10	10	10	0	0.0723969	0	0.00742682	0	0.0572463	0.134786	0.0910954	0.00573962	0.00200259	0.0372877	0	0.00887784	0	0.0217462
TCGA-B0-4838-01A-01R-1305-07	TCGA-B0-4838-01A	TCGA-B0-4838	69	FEMALE	G3	Stage I	T1b	M0	N0	C1	C3	low	1	834	0	834	-0.9035	NA	10	172.942	511.971	-1053.36	0.372948	NA	NA	0.888202	0.660161	2.15557	NA	71	0.265032	6	6	7	0	0.0074989	0	0	0	0	0.0390252	0.123774	0.00733443	0	0.0401747	0.00304892	0.0637121	0	0.0131276
TCGA-B0-4843-01A-01R-1277-07	TCGA-B0-4843-01A	TCGA-B0-4843	57	MALE	G3	Stage III	T3a	M0	N0	C1	C3	high	1	320	1	320	-0.9886	NA	2	-183.293	-245.07	-260.088	0.29026	NA	NA	NA	0.982568	1.85275	NA	101	0.0622224	6	6	2	0.0398768	0.0215622	0.0115883	0	0	0.0979061	0.0243597	0.229365	0.0655056	0	0.105074	0.000955171	0.0355487	0.00180478	0
TCGA-B0-4844-01A-01R-1277-07	TCGA-B0-4844-01A	TCGA-B0-4844	60	MALE	G3	Stage IV	T3a	M1	NX	C1	C2	low	1	313	1	62	-1.0832	NA	16	2344.16	-27.2976	-1235.99	0.188018	NA	NA	0.759375	0.964516	1.42784	NA	163	0.387407	11	11	14	0	0.025884	0	0	0	0	0.120162	0.214085	0	0.0243801	0.0353852	0.00247427	0.00961247	0	0.0292945
TCGA-B0-4848-01A-01R-1277-07	TCGA-B0-4848-01A	TCGA-B0-4848	54	MALE	G3	Stage III	T3b	M0	NX	C1	C3	low	1	883	1	494	-1.027	NA	3	352.6	480.611	-1065.72	0.373644	NA	NA	0.536291	0.9739	2.36493	NA	99	0.361621	9	9	6	0	0.0256744	0	0	0	0.0251797	0.0728651	0.267654	0	0.0119308	0.104096	0	0	0.011279	0.00395765
TCGA-B0-5080-01A-01R-1503-07	TCGA-B0-5080-01A	TCGA-B0-5080	63	MALE	G3	Stage IV	T3a	M1	N0	C1	C3	high	1	342	1	103	-0.8767	0.2	2	-1272.33	588.716	-545.088	0.411494	34	171	0.572639	0.977493	1.75745	1.6155	54	0.052353	0	0	19	0.0036475	0.0685985	0	0	0	0	0.027008	0.155778	0	0.0490176	0.0220611	0.00392345	0.0787582	0	0.0733825
TCGA-B0-5081-01A-01R-1334-07	TCGA-B0-5081-01A	TCGA-B0-5081	79	FEMALE	G2	Stage III	T3b	M0	N0	C1	C3	low	1	362	1	213	-0.4084	0.26	0	-271.005	762.575	-139.021	0.592971	21	11	0.734694	0.971787	2.14604	1.20325	126	0.135568	11	11	3	0.00364454	0.021696	0	0.00737226	0	0	0.0962797	0.141437	0.0103803	0	0.0209291	0	0.0253271	0	0.0174193
TCGA-B0-5092-01A-01R-1420-07	TCGA-B0-5092-01A	TCGA-B0-5092	53	FEMALE	G3	Stage IV	T1a	M1	N0	C1	C3	high	1	459	1	459	-0.4259	0.15	2	604.693	768.945	-736.738	0.475753	26	44	0.945768	0.915333	2.50951	1.82932	73	0.118462	6	6	3	0	0.0122189	0	0.00491113	0	0	0.0490585	0.106223	0.0115902	0	0.0150783	0.00115717	0.116789	0	0.0229164
TCGA-B0-5100-01A-01R-1420-07	TCGA-B0-5100-01A	TCGA-B0-5100	72	MALE	G3	Stage III	T3a	M0	NX	C1	C3	high	1	1913	1	1426	-1.4381	0	2	1508.21	-94.922	-402.954	0.0693223	13	0	NA	0.894965	1.11591	0.687121	93	0.0485264	0	0	5	0	0.0388126	0	0	0	0.112332	0.0389803	0.262299	0	0.0468978	0.062059	0.00653631	0.0730662	0.0448537	0.0261242
TCGA-B0-5108-01A-01R-1420-07	TCGA-B0-5108-01A	TCGA-B0-5108	54	MALE	G2	Stage III	T3a	M0	N0	C1	C3	low	0	1782	0	1782	-1.2028	0	5	1594.95	213.307	-429.563	0.380141	18	135	0.918471	0.985894	1.52666	1.0182	77	0.16356	6	6	6	0	0.0389706	0	0	0	0.128045	0.0550715	0.322798	0.0177314	0	0.0315017	0.00493147	0	0.0257183	0.0169879
TCGA-B0-5691-01A-11R-1541-07	TCGA-B0-5691-01A	TCGA-B0-5691	66	FEMALE	G3	Stage I	T1a	M0	N0	C1	C3	low	0	3431	1	3250	-1.4156	0	0	2795.34	345.396	-446.148	0.212574	23	7	0.975352	0.86319	1.51718	1.35812	87	0.0812468	9	9	4	0	0.129585	0	0	0	0	0.0838255	0.249431	0	0.0775399	0.0878918	0	0.00113782	0	0.057579
TCGA-B0-5697-01A-11R-1541-07	TCGA-B0-5697-01A	TCGA-B0-5697	50	MALE	G2	Stage I	T1a	M0	N0	C1	C3	high	0	2630	0	2630	-1.141	0.03	5	274.148	663.577	-1140.74	0.438037	31	0	NA	0.840913	1.77748	1.30934	99	0.186011	4	4	13	0	0.0598952	0.00431333	0.000988471	0	0	0.0268219	0.281309	0.00219002	0.0095653	0.0231323	0.00658636	0.0781388	0	0.0117711
TCGA-B0-5701-01A-11R-1541-07	TCGA-B0-5701-01A	TCGA-B0-5701	65	MALE	G4	Stage III	T3b	M0	N0	C1	C3	low	0	2461	1	224	-0.7377	0.01	5	969.368	148.118	-573.839	0.301657	54	110	0.838439	0.993386	2.04226	2.61534	83	0.271156	14	14	7	0	0.0354604	0	0.000970727	0	0.033784	0.161022	0.281203	0	0.0145961	0.021481	0.00788775	0.0317456	0	0.0199283
TCGA-B0-5709-01A-11R-1541-07	TCGA-B0-5709-01A	TCGA-B0-5709	62	FEMALE	G3	Stage III	T3a	M0	NX	C1	C3	low	0	3974	0	3974	-0.8407	0.03	1	2891.47	586.17	-350.133	0.414564	31	111	0.820098	0.97569	1.64421	1.6904	87	0.11405	12	12	7	0	0.0769384	0	0.0259534	0	0	0.0984019	0.166696	0	0.0415629	0.0479935	0.005713	0.0330649	0	0.0570343
TCGA-B2-4098-01A-02R-1325-07	TCGA-B2-4098-01A	TCGA-B2-4098	72	FEMALE	G2	Stage I	T1b	M0	NX	C1	C3	high	1	51	0	51	-1.5496	0.01	4	793.98	-378.205	-1824.25	0.318895	16	127	0.937031	0.850234	1.90514	1.17121	101	0.116461	9	9	7	0.0345529	0.00854094	0	0.0152931	0	0.059748	0.0119499	0.543244	0	0.0428412	0.0491889	0.0154597	0	0.0228953	0.0443083
TCGA-B2-5639-01A-01R-1541-07	TCGA-B2-5639-01A	TCGA-B2-5639	46	MALE	G3	Stage IV	T3	M1	NX	C1	C3	low	1	1003	1	163	-0.9527	0	3	653.595	731.958	-958.237	0.308679	18	131	0.949281	1	2.15669	1.26077	68	0.171521	6	6	4	0	0.0346457	0	0.0550144	0	0	0.0834866	0.332445	0	0.00416661	0.065663	0.014179	0.0256515	0	0.0622277
TCGA-B4-5836-01A-11R-1672-07	TCGA-B4-5836-01A	TCGA-B4-5836	61	FEMALE	G2	Stage I	T1b	M0	N0	C1	C3	low	0	141	0	141	-0.8794	0.02	1	2351.51	-23.1226	-868.445	0.293121	23	113	0.91757	0.96375	1.22735	1.58762	59	0.0563781	3	3	2	0	0.0112245	0	0	0	0	0.0999316	0.258911	0	0.10345	0.071335	0.024668	0.0621521	0.0569226	0.00803617
TCGA-B8-4620-01A-02R-1325-07	TCGA-B8-4620-01A	TCGA-B8-4620	70	FEMALE	G2	Stage III	T3a	M0	N0	C1	C4	high	0	777	1	604	-0.8796	0	18	1186.21	850.851	-1000.11	0.0988697	30	17	NA	0.981836	1.79244	1.48205	92	0.524603	5	5	11	0	0.0267191	0.0877283	0	0.0511358	0	0.00918569	0.29357	0	0.0248656	0.128404	0.1172	0	0.0425276	0.00364353
TCGA-B8-4622-01A-02R-1277-07	TCGA-B8-4622-01A	TCGA-B8-4622	57	MALE	G3	Stage IV	T3a	M1	N0	C1	C3	low	0	1525	1	1227	-1.1745	NA	8	2891.04	340.588	-1144.77	0.174179	NA	NA	0.514172	0.992104	1.75027	NA	71	0.191108	2	2	6	0	0.00912361	0	0	0	0.00200617	0.0551739	0.331848	0	0.0527144	0.101176	0.0140219	0.0326011	0.0695447	0.0179898
TCGA-B8-5158-01A-01R-1420-07	TCGA-B8-5158-01A	TCGA-B8-5158	56	MALE	G4	Stage III	T3a	M0	N1	C1	C3	high	0	1218	0	1218	-0.1479	0.07	9	2728.84	332.066	-821.162	0.503933	24	5	0.999839	0.954075	1.86795	1.49881	65	0.211248	9	9	11	0	0.0400692	0	0.118042	0	0	0.0872846	0.166935	0.0364891	0	0.102925	0.0321688	0	0.00629895	0.0120673
TCGA-B8-5162-01A-01R-1420-07	TCGA-B8-5162-01A	TCGA-B8-5162	62	MALE	G2	Stage II	T2a	M0	NX	C1	C3	low	0	36	0	36	-0.665	0	3	1000.83	542.275	18.6724	0.488727	32	64	0.524346	0.868495	1.53598	1.67025	57	0.160537	5	5	6	0.00398529	0.00956276	0	0.011226	0	0	0.0678935	0.285306	0.0206612	0	0.0205034	0.000346319	0.0309843	0	0.0912836
TCGA-B8-5163-01A-01R-1420-07	TCGA-B8-5163-01A	TCGA-B8-5163	63	FEMALE	G3	Stage III	T3a	M0	N0	C1	C2	low	0	822	0	822	-0.4055	0.03	12	165.177	1077.08	35.8601	0.439558	25	74	NA	NA	1.49259	1.60493	135	0.300628	3	3	55	0	0.0197325	0	0.00303368	0	0	0.0722003	0.263918	0.0127214	0	0.0264206	0.00835264	0.00726387	0	0.0175008
TCGA-B8-5545-01A-01R-1672-07	TCGA-B8-5545-01A	TCGA-B8-5545	42	MALE	G2	Stage I	T1a	M0	N0	C1	C3	low	0	1525	0	1525	-1.0025	NA	2	990.782	256.114	-647.972	0.267978	12	70	0.768413	0.980741	1.24861	0.466501	55	0.0498348	0	0	19	0	0.108163	0	0.0179626	0	0	0.0328702	0.372086	0	0.0967184	0.0432647	0.00999541	0.027973	0	0.0238268
TCGA-B8-5551-01A-01R-1541-07	TCGA-B8-5551-01A	TCGA-B8-5551	65	FEMALE	G3	Stage I	T1b	M0	N0	C1	C3	high	0	16	0	16	-0.0736	0.44	28	1732.48	650.193	-683.051	0.644649	27	137	0.733147	0.965793	3.33606	1.18828	81	0.264697	7	7	7	0.022702	0	0	0.00817068	0	0	0.0992452	0.307438	0	0.0119515	0.0537512	0.0176739	0.0335511	0	0.0419052
TCGA-B8-A7U6-01A-12R-A37O-07	TCGA-B8-A7U6-01A	TCGA-B8-A7U6	54	FEMALE	G3	Stage I	T1a	NA	NX	C1	C3	low	0	495	0	495	-1.0585	0.03	1	474.723	963.759	-1212.6	0.2417	20	86	NA	0.984859	1.0935	1.35026	91	0.0321687	5	5	12	0	0.101942	0	0	0	0	0.0344432	0.274383	0.184668	0	0.0733162	0.00835975	0.0638258	0.00128931	0.0783955
TCGA-B8-A8YJ-01A-13R-A39I-07	TCGA-B8-A8YJ-01A	TCGA-B8-A8YJ	60	FEMALE	G2	Stage I	T1b	NA	NX	C1	C3	low	0	431	0	431	-1.6009	0.07	0	-425.367	893.516	-273.239	0.429104	19	NA	0.895146	1	1.16237	0.713996	55	1.79e-05	0	0	2	0	0.0983914	0.00933699	0	0	0	0.0165695	0.306558	0.000597878	0.0552256	0.0856577	3.84e-05	0	0.0900202	0.0351932
TCGA-BP-4161-01A-02R-1325-07	TCGA-BP-4161-01A	TCGA-BP-4161	74	MALE	G3	Stage I	T1b	M0	NX	C1	C3	low	0	2746	1	2685	-0.9632	0.39	1	3336.41	708.287	-1477.51	0.25736	23	33	0.399157	0.918322	1.89636	1.44537	109	0.177135	7	7	5	0	0.0107496	0	0.000877584	0	0.0372514	0.0723806	0.302139	0	0.0198732	0.0323905	0.00124464	0.047748	0	0.0325138
TCGA-BP-4163-01A-02R-1325-07	TCGA-BP-4163-01A	TCGA-BP-4163	60	FEMALE	G3	Stage III	T3a	M0	N0	C1	C3	low	0	2839	0	2839	-1.2909	0	6	2355.48	-720.114	-1194.08	0.306485	9	0	NA	0.984679	1.73915	1.16191	88	0.177446	4	4	5	0	0.0398183	0	0	0	0	0.0698736	0.419866	0	0.0628551	0.130117	0.00328932	0.0110563	0	0.00976152
TCGA-BP-4167-01A-02R-1325-07	TCGA-BP-4167-01A	TCGA-BP-4167	59	MALE	G2	Stage III	T3a	M0	NX	C1	C3	low	0	2718	0	2718	-0.8624	0.6	5	-1979.62	439.802	-245.288	0.470232	9	8	0.933309	0.905704	1.31915	1.45976	49	0.119351	5	5	5	0.00624664	0.00179104	0	0.0112752	0	0	0.0537175	0.26695	0.0222713	0	0.0133742	0	0.0339569	0	0.00793628
TCGA-BP-4169-01A-02R-1289-07	TCGA-BP-4169-01A	TCGA-BP-4169	76	FEMALE	G2	Stage II	T2	M0	N0	C1	C3	low	1	701	1	78	-0.6137	NA	1	997.982	936.234	-87.0454	0.344083	NA	NA	0.739029	0.988981	1.7364	NA	70	0.0281328	4	4	6	0	0.0402941	0	0	0	0	0.127022	0.1822	0.106945	0	0.115067	0.0294272	0.0010258	0.0248683	0.0199051
TCGA-BP-4176-01A-02R-1289-07	TCGA-BP-4176-01A	TCGA-BP-4176	64	MALE	G2	Stage I	T1b	M0	NX	C1	C3	low	0	1955	0	1955	-1.1107	NA	16	578.024	1079.58	-1099.16	0.284655	NA	NA	0.870511	0.987001	2.13364	NA	92	0.493732	8	8	4	0	0.0156264	0.0222609	0	0.0147473	0.0680983	0.00347633	0.445801	0.0756343	0	0.0527988	0.0303436	0	0	0.0181599
TCGA-BP-4177-01A-02R-1420-07	TCGA-BP-4177-01A	TCGA-BP-4177	65	MALE	G2	Stage I	T1a	M0	NX	C1	C3	low	0	1670	0	1670	-1.7904	NA	6	2236.4	80.9205	-510.044	0.0751687	NA	NA	NA	0.984815	1.24656	0.254561	63	0.142734	0	0	0	0	0.154618	0	0	0	0	0.0403214	0.34116	0.0255159	0.0304869	0.0379284	0	0.0575689	0	0.0352293
TCGA-BP-4326-01A-01R-1289-07	TCGA-BP-4326-01A	TCGA-BP-4326	53	FEMALE	G2	Stage I	T1b	M0	N0	C1	C3	low	1	1625	1	958	-1.1505	NA	1	1387.24	39.1864	-431.262	0.0939866	NA	NA	NA	1	1.83095	NA	87	0.0354863	10	10	4	0	0.0289945	0.0413777	0	0	0	0.0453645	0.301865	0	0.129619	0.0438358	0.0322931	0.00156938	0.0636028	0.0183978
TCGA-BP-4345-01A-01R-1289-07	TCGA-BP-4345-01A	TCGA-BP-4345	62	MALE	G3	Stage III	T3b	M0	N0	C1	C3	low	0	1516	0	1516	-0.5478	NA	NA	-1001.15	166.298	336.66	0.3133	NA	NA	NA	0.986727	1.57685	NA	NA	NA	NA	NA	NA	0	0.0109045	0	0	0	0.129425	0.0458054	0.374265	0	0.0154962	0.0342983	0	0.0216889	0	0.0136618
TCGA-BP-4760-01A-02R-1420-07	TCGA-BP-4760-01A	TCGA-BP-4760	69	MALE	G2	Stage I	T1a	M0	NX	C1	C3	low	0	2361	1	1457	-1.4206	0	0	3216.33	728.287	-285.391	0.0840673	5	2	NA	1	1.04401	0.285667	65	6.19e-05	0	0	2	0	0.0551705	0	0	0	0.157971	0.0166068	0.562227	0	0.0786062	0.00131204	0.00497131	0.00760528	0.00551748	0.00434079
TCGA-BP-4769-01A-01R-1289-07	TCGA-BP-4769-01A	TCGA-BP-4769	63	MALE	G2	Stage I	T1a	M0	NX	C1	C3	high	0	1876	0	1876	-2.1459	NA	NA	3334.71	761.37	-108.705	0.123227	NA	NA	NA	NA	0.891974	NA	45	2.88e-05	NA	NA	NA	0.0240497	0.0506084	0.00550064	0	0	0	0.0343539	0.243235	0.00185343	0.0490385	0.0964657	0.00716719	0.0162763	0	0
TCGA-BP-4782-01A-02R-1420-07	TCGA-BP-4782-01A	TCGA-BP-4782	55	FEMALE	G2	Stage I	T1a	M0	NX	C1	C3	low	0	354	0	354	-1.3891	0.05	5	1872.17	152.307	-824.472	0.297403	48	266	NA	0.955505	1.30493	2.08795	67	0.189081	8	8	4	0	0.00900243	0	0.00183969	0	0	0.0540746	0.425964	0	0.0447325	0.012825	0	0.0727397	0	0.00861083
TCGA-BP-4784-01A-01R-1305-07	TCGA-BP-4784-01A	TCGA-BP-4784	67	FEMALE	G2	Stage I	T1a	M0	NX	C1	C3	high	0	1854	0	1854	-1.4021	NA	NA	2547.16	-79.4051	-310.712	0.150493	NA	NA	0.714024	0.946395	1.16981	NA	51	2.36e-05	NA	NA	NA	0.0438046	0.00814225	0.0406131	0	0	0	0.0136966	0.522601	0	0.109538	0.0149094	0	0.0431868	0	0.0386348
TCGA-BP-4795-01A-02R-1420-07	TCGA-BP-4795-01A	TCGA-BP-4795	74	FEMALE	G2	Stage I	T1a	M0	N0	C1	C3	low	0	620	0	620	-1.4075	0	1	1284.07	16.7084	-401.7	0.204691	NA	NA	0.596747	0.993987	1.07517	0.400278	73	0.0196466	3	3	12	0	0.0891215	0.00762879	0	0	0	0.00826198	0.369008	0	0.0711392	0.0667983	0	0.0488359	0	0.0127026
TCGA-BP-4798-01A-01R-1305-07	TCGA-BP-4798-01A	TCGA-BP-4798	74	MALE	G4	NA	T3b	M1	N0	C1	C3	low	1	334	1	334	-0.6573	NA	12	-1871.77	687.199	-876.196	0.455657	NA	NA	0.612243	0.861372	2.43349	NA	103	0.289313	8	8	9	0	0.0489794	0	0.00511988	0	0	0.0680446	0.200645	0.0194498	0	0.01311	0.0114508	0.0478982	0	0.0239267
TCGA-BP-4801-01A-02R-1420-07	TCGA-BP-4801-01A	TCGA-BP-4801	57	MALE	G2	Stage I	T1a	M0	NX	C1	C3	low	0	1124	0	1124	-1.4911	NA	2	3535.4	549.975	-436.786	0.255567	18	13	NA	NA	1.17118	1.49831	74	0.0982041	5	5	3	0	0.0164338	0	0	0	0	0.0518952	0.605331	0.0162881	0.0221239	0.0188517	0	0.0550388	0	0.000649342
TCGA-BP-4803-01A-01R-1305-07	TCGA-BP-4803-01A	TCGA-BP-4803	79	MALE	G3	Stage III	T3a	M0	NX	C1	C3	low	0	204	0	204	-1.2781	NA	4	3306.07	330.334	-917.656	0.156393	NA	NA	0.905628	0.992974	1.66434	NA	57	0.39751	0	0	2	0	0.0392597	0.0014116	0	0.0050479	0	0.0498099	0.3373	0.0166878	0	0.035128	0	0.0362374	0.0489134	0.000949175
TCGA-BP-4804-01A-02R-1305-07	TCGA-BP-4804-01A	TCGA-BP-4804	59	MALE	G2	Stage I	T1b	M0	NX	C1	C3	low	0	1459	1	295	-0.7957	NA	NA	2126.18	642.554	-442.385	0.513814	NA	NA	0.794431	0.96844	1.93244	NA	57	0.0618925	NA	NA	NA	0	0.00694593	0	0	0	0.100047	0.0840474	0.235268	0	0.0147464	0.00803135	0	0.0481461	0	0.00861158
TCGA-BP-4807-01A-01R-1305-07	TCGA-BP-4807-01A	TCGA-BP-4807	42	MALE	G3	Stage I	T1a	M0	NX	C1	C3	low	0	211	0	211	-1.1557	NA	2	3296.08	560.199	-640.061	0.117911	NA	NA	NA	1	1.60213	NA	91	0.0503848	5	5	4	0	0.0124219	0	0	0	0	0.026956	0.562743	0.119905	0	0.0362237	0.0334719	0.0188673	0.00770592	0
TCGA-BP-4959-01A-01R-1334-07	TCGA-BP-4959-01A	TCGA-BP-4959	49	MALE	G3	Stage I	T1b	M0	NX	C1	C3	low	0	2660	0	2660	-1.2198	NA	4	2712.87	445.661	-1091.1	0.387445	NA	NA	NA	0.900216	1.1661	NA	71	0.219768	5	5	4	0	0.0744353	0.00419504	0.000331072	0	0.0557061	0.00981209	0.483559	0	0.0371758	0.0328119	0	0.00799643	0.0019409	0.0137286
TCGA-BP-4960-01A-01R-1334-07	TCGA-BP-4960-01A	TCGA-BP-4960	46	MALE	G3	Stage II	T2	M0	N0	C1	C3	low	0	2172	0	2172	-1.0166	0.31	11	-33.3642	439.129	-1569.12	0.276851	21	65	0.80253	0.992991	1.70642	1.5956	122	0.424563	4	4	5	0.0115004	0.00630819	0.00778625	0	0	0.107844	0.00321067	0.261404	0.0986139	0	0.127443	0.000841784	0.0136922	0.0223682	0.0184737
TCGA-BP-4964-01A-01R-1334-07	TCGA-BP-4964-01A	TCGA-BP-4964	54	FEMALE	G2	Stage I	T1a	M0	N0	C1	C3	low	0	1862	0	1862	-1.1368	0.18	0	2849.04	218.18	-1130.54	0.197757	46	192	NA	0.959958	1.76942	2.27423	85	0.185051	5	5	2	0	0.0100439	0	0.0273158	0	0.0150908	0.11959	0.250399	0	0.0207681	0.013203	0	0.0847279	0	0.0203996
TCGA-BP-4970-01A-01R-1334-07	TCGA-BP-4970-01A	TCGA-BP-4970	44	MALE	G3	Stage III	T1a	M0	N1	C1	C3	low	0	433	0	433	-1.2587	0.03	1	2360.56	796.972	-597.188	0.358966	4	58	0.982036	0.924055	1.69615	0.861369	103	0.0676746	7	7	6	0	0.0191828	0	0.0123675	0	0	0.0582946	0.312468	0.00305675	0.0128675	0.0654045	0.0273656	0.0451472	0	0.0155934
TCGA-BP-4998-01A-01R-1334-07	TCGA-BP-4998-01A	TCGA-BP-4998	49	MALE	G3	Stage I	T1a	M0	NX	C1	C3	low	0	932	0	932	-1.1573	0.12	3	2009.06	306.261	-668.379	0.28385	17	0	0.917273	0.981638	1.63925	0.832341	59	0.138553	5	5	2	0	0.0113291	0	0.0210669	0	0	0.0659943	0.407892	0	0.0357716	0.00873159	0.0207902	0.0270449	0	0.0173376
TCGA-BP-5010-01A-02R-1420-07	TCGA-BP-5010-01A	TCGA-BP-5010	63	MALE	G4	Stage III	T3a	M0	N0	C1	C3	high	1	878	1	582	-1.0238	0.01	3	-24.8488	1252.98	-572.078	0.307493	26	36	NA	0.985358	1.47797	1.66022	76	0.0976695	5	5	4	0	0.0229587	0	0	0	0.0722189	0.0546581	0.220184	0.0196821	0	0.00838236	0	0.0420361	0	0.0402443
TCGA-BP-5178-01A-01R-1426-07	TCGA-BP-5178-01A	TCGA-BP-5178	71	MALE	G4	Stage IV	T3a	M1	NX	C1	C3	high	1	1912	1	396	-0.8008	0.11	19	2686.39	527.048	-1484.45	0.356921	16	27	0.441294	0.971728	2.00092	1.31089	68	0.455975	4	4	7	0	0.0998241	0.000385579	0	0	0.0365629	0.0156054	0.509875	0	0.0101113	0.00829724	0.00571444	0	0.032823	0.0143602
TCGA-BP-5182-01A-01R-1426-07	TCGA-BP-5182-01A	TCGA-BP-5182	56	MALE	G3	Stage I	T1a	M0	N0	C1	C3	low	0	1165	0	1165	-1.1831	NA	4	2710.24	416.19	-887.334	0.346672	13	24	0.756943	0.879585	1.18049	1.54469	65	0.0873968	10	10	4	0.0084665	0.014742	0	0.00669538	0	0.0243904	0.0377506	0.471886	0.00889271	0.00851192	0.0391258	0	0.0223947	0	0.0039366
TCGA-BP-5198-01A-01R-1426-07	TCGA-BP-5198-01A	TCGA-BP-5198	72	MALE	G3	Stage III	T3b	M0	N0	C1	C6	low	0	603	0	603	-0.5531	0.04	16	1705.41	427.404	-202.841	0.319033	18	13	0.882526	0.990636	1.79846	1.73465	118	0.485125	5	5	4	0	0.1014	0	0	0	0.101367	0.0240074	0.304208	0	0	0.0176825	0.00652715	0.00263409	0	0.0996744
TCGA-BP-5201-01A-01R-1426-07	TCGA-BP-5201-01A	TCGA-BP-5201	63	MALE	G4	Stage IV	T3b	M1	N0	C1	C3	low	0	951	1	NA	-0.769	0.2	7	2270.32	719.171	-1186.99	0.239262	14	1	NA	0.436054	2.22765	1.04853	115	0.641942	7	7	11	0	0.0122995	0	0.0058969	0	0	0.0864708	0.115038	0.0270412	0	0.000831483	0.0013557	0.0524448	0	0.0264589
TCGA-CJ-4636-01A-02R-1325-07	TCGA-CJ-4636-01A	TCGA-CJ-4636	51	MALE	G3	Stage III	T3a	M0	N0	C1	C3	low	0	1924	0	1924	-0.7809	0.07	11	790.4	51.1609	-785.831	0.249184	24	43	NA	0.88374	1.53347	1.49532	87	0.306297	8	8	7	0	0.0507944	0	0	0	0	0.0275041	0.396717	0.0198873	0	0.00182028	0.00384527	0	0	0.0138506
TCGA-CJ-4637-01A-02R-1325-07	TCGA-CJ-4637-01A	TCGA-CJ-4637	52	FEMALE	G4	Stage IV	T2b	M1	NX	C1	C3	high	1	2227	1	1821	-0.1682	0.19	1	1324.01	996.341	-452.572	0.604272	19	100	0.300877	0.753741	1.98342	0.988635	91	0.121861	7	7	5	0.0234273	0	0	0	0	0	0.14325	0.0872472	0.00704628	0	0.02932	0.0031467	0.0905255	0	0.048051
TCGA-CJ-4641-01A-02R-1325-07	TCGA-CJ-4641-01A	TCGA-CJ-4641	55	FEMALE	G4	Stage IV	T3a	M1	NX	C1	C3	low	1	1661	1	NA	-0.705	NA	NA	1592.15	607.394	-696.276	0.577879	19	83	0.999833	0.908135	1.95868	1.18316	78	0.0823621	NA	NA	NA	0	0.052343	0	0.0220759	0	0	0.112795	0.154321	0	0.0241961	0.0401561	0	0.0332476	0	0.0211334
TCGA-CJ-4644-01A-02R-1325-07	TCGA-CJ-4644-01A	TCGA-CJ-4644	48	FEMALE	G3	Stage IV	T3a	M1	N0	C1	C3	low	1	336	1	93	-1.269	0.42	3	2170.62	235.409	-1046.59	0.216492	27	5	NA	0.944077	1.50327	1.42733	74	0.441274	2	2	19	0.00582879	0	0	0	0	0	0.0554801	0.249134	0	0.0225711	0.0999499	0.00130269	0.0757645	0	0.0050265
TCGA-CJ-4868-01A-01R-1305-07	TCGA-CJ-4868-01A	TCGA-CJ-4868	42	MALE	G3	Stage IV	T3a	M1	N0	C1	C6	high	1	646	1	37	-0.1376	NA	2	607.921	967.078	2.77704	0.459126	NA	NA	0.66398	0.754869	2.34341	NA	107	0.0800708	9	9	9	0	0.0454469	0	0.00470967	0	0	0.0682766	0.28117	0	0.0288085	0.0543345	0.0042999	0.0294625	0	0.0104779
TCGA-CJ-4869-01A-02R-1426-07	TCGA-CJ-4869-01A	TCGA-CJ-4869	49	MALE	G2	Stage III	T2	M0	N1	C1	C3	low	0	2554	1	1754	-0.8794	0.15	1	210.256	757.483	-1100.75	0.487154	40	88	0.513597	0.950901	1.64772	1.83426	84	0.150435	8	8	6	0	0.00815107	0	0.00653432	0	0	0.029355	0.143692	0	0.012105	0.0131044	0.00710801	0.0714086	0	0.00892568
TCGA-CJ-4872-01A-01R-1305-07	TCGA-CJ-4872-01A	TCGA-CJ-4872	51	MALE	G4	Stage I	T1b	M0	N0	C1	C3	low	0	1435	0	1435	-0.752	NA	NA	882.912	377.616	-665.856	0.31098	NA	NA	NA	0.978192	2.10647	NA	69	0.19511	NA	NA	NA	0	0.13574	0.00125924	0.00491053	0	0.00407731	0.0734891	0.0986757	0	0.0304086	0.0760054	0	0.0063586	0.0603517	0.0394432
TCGA-CJ-4873-01A-01R-1305-07	TCGA-CJ-4873-01A	TCGA-CJ-4873	85	FEMALE	G3	Stage III	T3a	M0	N0	C1	C3	high	0	2259	0	2259	-1.0721	NA	18	688.482	25.7677	-1266.4	0.360881	NA	NA	0.897796	0.954497	1.98424	NA	72	0.441523	11	11	6	0.0202686	0.0101708	0	0.00505437	0	0	0.0435662	0.309783	0	0.0231762	0.0397253	0	0.0341868	0	0.025242
TCGA-CJ-4881-01A-01R-1305-07	TCGA-CJ-4881-01A	TCGA-CJ-4881	41	MALE	G3	Stage III	T3a	M0	NX	C1	C3	high	0	2014	1	1881	-0.6762	NA	11	790.123	547.764	-1142.53	0.337895	NA	NA	0.89463	0.9555	2.3571	NA	86	0.414924	20	20	16	0	0.0115731	0	0	0	0.00741056	0.0365798	0.311611	0	0.0169538	0.0772933	0.0238282	0.0489952	0	0.0266296
TCGA-CJ-4882-01A-02R-1426-07	TCGA-CJ-4882-01A	TCGA-CJ-4882	57	MALE	G3	Stage III	T3a	M0	NX	C1	C3	high	0	1883	0	1883	-0.7091	0.43	3	-141.653	559.677	-449.519	0.476577	26	31	0.817738	0.988109	2.72209	1.90368	67	0.0797051	4	4	6	0	0.101066	0	0.00222327	0	0	0.0552058	0.129913	0	0.0184553	0.010358	0	0.0035735	0	0.106864
TCGA-CJ-4884-01A-01R-1305-07	TCGA-CJ-4884-01A	TCGA-CJ-4884	72	FEMALE	G3	Stage III	T3a	M0	NX	C1	C3	low	0	1759	0	1759	-0.862	NA	3	796.852	182.792	-786.665	0.311337	NA	NA	NA	0.963211	1.46623	NA	70	0.143734	9	9	4	0	0.0201526	0	0	0	0.0306052	0.0493908	0.315222	0	0.0116202	0.0371964	0	0.0511828	0	0.0261282
TCGA-CJ-4888-01A-01R-1305-07	TCGA-CJ-4888-01A	TCGA-CJ-4888	59	MALE	G4	Stage IV	T3a	M1	NX	C1	C3	high	1	1567	1	608	-0.5739	NA	NA	31.9472	789.005	-525.175	0.733238	NA	NA	0.724345	0.896323	1.89826	NA	43	0.0777472	NA	NA	NA	0.000691229	0	0	0.00182769	0	0.0270376	0.0874606	0.189389	0	0.00937063	0.0206722	0.0148499	0.0639196	0	0.0285769
TCGA-CJ-4890-01A-01R-1305-07	TCGA-CJ-4890-01A	TCGA-CJ-4890	72	MALE	G4	Stage IV	T3a	M1	N0	C1	C3	high	0	3519	1	70	-0.4252	NA	NA	233.905	642.066	184.627	0.607473	NA	NA	0.839395	0.901766	1.77541	NA	69	0.00803253	NA	NA	NA	0	0.0833787	0	0.00996895	0	0.0275932	0.0373119	0.323523	0	0.0156875	0.0098286	0.0106083	0.00563498	0	0.109216
TCGA-CJ-4895-01A-01R-1305-07	TCGA-CJ-4895-01A	TCGA-CJ-4895	62	MALE	G4	Stage IV	T3a	M1	NX	C1	C3	high	1	1200	1	61	-0.8549	NA	3	2456.05	352.879	-833.963	0.267483	NA	NA	0.949452	0.988133	2.17081	NA	63	0.118953	4	4	6	0	0.0611097	0	0	0	0	0.0328749	0.385904	0.033021	0	0.0463853	0.00600431	0	0.0372482	0.0161183
TCGA-CJ-4900-01A-01R-1334-07	TCGA-CJ-4900-01A	TCGA-CJ-4900	69	FEMALE	G4	Stage IV	T4	M1	N1	C1	C3	high	1	1714	1	1714	-0.6613	0.1	2	2307.01	623.985	-1119.98	0.453692	9	NA	0.719097	0.882306	2.06333	1.03963	87	0.132348	14	14	5	0	0.0453693	0	0.0138993	0	0	0.0716092	0.190007	0.0221926	0	0.019427	0.00448638	0	0	0.124331
TCGA-CJ-4901-01A-01R-1426-07	TCGA-CJ-4901-01A	TCGA-CJ-4901	47	MALE	G3	Stage III	T3b	M0	NX	C1	C3	high	0	1450	0	1450	-0.3593	0.55	29	-263.502	1263.18	-789.212	0.477227	17	37	0.779872	0.983979	2.02661	1.43723	57	0.669116	9	9	8	0.0155573	0	0	0.0154523	0	0.00913365	0.0983744	0.164521	0.00469264	0	0.00606195	0.00384952	0.0480228	0	0.0158584
TCGA-CJ-4918-01A-01R-1426-07	TCGA-CJ-4918-01A	TCGA-CJ-4918	64	MALE	G4	Stage IV	T3a	M1	N0	C1	C3	low	1	93	1	33	-0.9248	0	0	-1809.04	102.452	-337.815	0.356269	29	31	0.837636	0.986323	2.11261	1.73551	68	0.0535176	4	4	19	0	0.0828575	0	0	0	0	0.0480563	0.352657	0	0.0453331	0.0216475	0.0155242	0.050736	0	0.0798596
TCGA-CJ-4920-01A-01R-1426-07	TCGA-CJ-4920-01A	TCGA-CJ-4920	64	FEMALE	G2	Stage I	T1b	M0	NX	C1	C3	high	1	139	0	139	-0.7934	0.21	0	2900.64	255.854	-988.362	0.215226	40	155	0.845776	0.982496	2.30205	3.44552	51	0.0714771	2	2	2	0.00883497	0.0218625	0	0	0	0.00848417	0.0425509	0.381654	0.0334343	0	0.108203	0	0.0195701	0	0
TCGA-CJ-5671-01A-11R-1541-07	TCGA-CJ-5671-01A	TCGA-CJ-5671	51	MALE	G3	Stage I	T1a	M0	NX	C1	C3	low	0	3987	0	3987	-0.9367	0.28	20	472.978	583.46	-643.181	0.398149	24	112	0.929535	0.986243	1.88811	1.57452	58	0.411534	4	4	2	0	0.0491168	0	0	0	0.00801448	0.0354276	0.384993	0	0.0284531	0.0165655	0	0.00738921	0	0.00493999
TCGA-CJ-5676-01A-11R-1541-07	TCGA-CJ-5676-01A	TCGA-CJ-5676	47	MALE	G3	Stage III	T3b	M0	NX	C1	C3	low	0	4067	1	2219	-1.4141	0.61	5	1037.44	574.405	-1154.98	0.293588	23	119	0.90961	0.868771	1.72566	1.52462	60	0.614244	4	4	2	0	0.0112873	0	0	0	0	0.0320442	0.310008	0	0.00468139	0.0550989	0.003217	0.0383856	0	0.0669922
TCGA-CJ-5680-01A-11R-1541-07	TCGA-CJ-5680-01A	TCGA-CJ-5680	65	FEMALE	G4	Stage IV	T3a	M1	NX	C1	C3	low	1	768	1	153	-1.4505	0	2	2875.5	-817.3	-1623.92	0.175408	11	32	NA	0.971046	1.14672	1.27943	89	0.121726	6	6	13	0.00235992	0	0.0161243	0	0	0	0.0269283	0.364108	0	0.0401085	0.216653	0.0131361	0.0314275	0.00724624	0.00838113
TCGA-CJ-5682-01A-11R-1541-07	TCGA-CJ-5682-01A	TCGA-CJ-5682	60	MALE	G4	Stage IV	T3a	M1	NX	C1	C3	low	0	3736	1	55	-1.0155	NA	20	1265.83	726.674	-148.901	0.107849	29	172	NA	0.905826	1.69525	1.84451	61	0.552039	0	0	19	0	0.1324	0.00104125	0	0	0	0.0935079	0.179114	0	0.0434882	0.0290038	0	0.0805668	0	0.0518444
TCGA-CJ-5683-01A-11R-1541-07	TCGA-CJ-5683-01A	TCGA-CJ-5683	78	MALE	G3	Stage I	T1b	M0	NX	C1	C3	low	0	1889	0	1889	-0.6335	0.02	6	2362.6	414.128	-933.07	0.121932	33	194	NA	0.789304	3.19127	1.45499	69	0.173542	4	4	19	0.00775695	0	0.000521779	0.00900872	0.00232047	0	0.0423455	0.419906	0	0.0568684	0.0762219	0	0.0426471	0	0
TCGA-CJ-5689-01A-11R-1541-07	TCGA-CJ-5689-01A	TCGA-CJ-5689	90	MALE	G4	Stage I	T1b	M0	NX	C1	C3	high	1	1620	0	1620	-1.1385	0.23	4	551.776	685.093	-656.978	0.342591	23	14	0.698962	0.912417	1.68961	1.92254	45	0.186749	3	3	5	0	0.0486058	0	0.0102775	0	0.0178144	0.0252948	0.403408	0	0.0432811	0.10044	0.00609103	0.0252661	0.049543	0.00746663
TCGA-CJ-6027-01A-11R-1672-07	TCGA-CJ-6027-01A	TCGA-CJ-6027	77	MALE	G4	Stage I	T1a	M0	NX	C1	C2	high	1	3615	0	3615	-0.3409	0.16	9	2032.65	1058.37	-741.018	0.362951	34	110	0.1736	0.833169	1.62146	2.04741	57	0.790747	13	13	13	0	0.00282767	0	0.00130124	0	0.00500698	0.148506	0.259426	0	0	0	0	0.0759142	0	0.0100211
TCGA-CJ-6030-01A-11R-1672-07	TCGA-CJ-6030-01A	TCGA-CJ-6030	65	MALE	G3	Stage I	T1a	M0	N0	C1	C3	low	1	2299	0	2299	-0.9814	0.05	6	1160.72	514.613	-1118.45	0.421784	36	190	0.951842	0.983759	2.02898	2.83075	68	0.301294	6	6	11	0	0.0509829	0.00861288	0	0	0	0.0217443	0.455757	0	0.0236857	0.00152567	0.0197644	0.0140517	0	0.0265879
TCGA-CJ-6033-01A-11R-1672-07	TCGA-CJ-6033-01A	TCGA-CJ-6033	54	FEMALE	G4	Stage IV	T3a	M1	N0	C1	C6	low	1	224	1	144	-0.6412	0.22	4	1174.7	450.393	-405.675	0.32899	40	0	0.963476	0.980309	2.0436	1.84629	99	0.255368	6	6	6	0	0.0220482	0	0	0	0.065244	0.0555239	0.360868	0	0.0120781	0.130467	0	0.0184844	0	0.000514946
TCGA-CW-5580-01A-01R-1672-07	TCGA-CW-5580-01A	TCGA-CW-5580	73	FEMALE	G3	Stage IV	T3a	M1	NX	C1	C3	low	1	1964	0	1964	-0.7834	0.12	3	2646.62	514.53	-523.558	0.170912	44	152	0.99582	0.990286	1.99156	2.2658	59	0.229915	2	2	3	0	0.000634452	0.0954628	0	0	0	0.0362132	0.382194	0.0441426	0	0.167322	0.0217272	0.0625968	0	0.00616012
TCGA-CW-5581-01A-02R-1541-07	TCGA-CW-5581-01A	TCGA-CW-5581	44	MALE	G3	Stage I	T1b	M0	NX	C1	C3	low	0	2799	0	2799	-1.6809	0	2	2928.66	282.733	-1394.44	0.229749	22	90	NA	0.953063	1.68522	1.45239	127	0.0972553	10	10	10	0	0.0175795	0	0.0440013	0	0	0.111569	0.181145	0	0.0473005	0.019445	0.00102656	0.0366354	0	0.00218194
TCGA-CW-5588-01A-01R-1541-07	TCGA-CW-5588-01A	TCGA-CW-5588	78	FEMALE	G2	Stage I	T1a	M0	NX	C1	C3	low	0	2017	0	2017	-0.8653	NA	20	1591.43	-69.4941	-877.556	0.28256	NA	NA	0.812621	0.990284	1.76326	0	71	0.614863	10	10	5	0	0.0297794	0	0	0	0.00501626	0.0307562	0.571844	0	0.0100113	0.0222235	0.0138048	0.0309685	0	0
TCGA-CW-5590-01A-01R-1541-07	TCGA-CW-5590-01A	TCGA-CW-5590	51	MALE	G3	Stage IV	T3a	M1	NX	C1	C3	low	1	1075	1	672	-1.1984	NA	NA	2505.8	704.43	-986.823	0.236415	NA	NA	NA	0.979679	1.69611	NA	NA	NA	NA	NA	NA	0	0.00555199	0	0	0	0	0.130927	0.278485	0.0136159	0	0.0284042	0	0.117754	0	0.000348428
TCGA-CZ-4856-01A-02R-1426-07	TCGA-CZ-4856-01A	TCGA-CZ-4856	62	FEMALE	G2	Stage I	T1b	M0	N0	C1	C3	low	0	18	0	18	-1.4002	0	3	2352.01	212.902	-738.84	0.279851	33	48	0.942916	0.952824	1.75244	1.56919	89	0.113016	6	6	3	0.00822717	0	0	0.001239	0	0	0.0528996	0.287077	0	0.0361069	0.0101147	0.00202424	0.071967	0	0.0512324
TCGA-CZ-4862-01A-01R-1305-07	TCGA-CZ-4862-01A	TCGA-CZ-4862	46	MALE	G2	Stage I	T1b	M0	NX	C1	C3	low	0	3271	0	3271	-0.7323	NA	2	2484.15	404.524	-733.412	0.466928	NA	NA	NA	0.932399	1.72457	NA	73	0.0505069	0	0	19	0.00605852	0	0	0.00130113	0	0	0.130584	0.183949	0	0.0164835	0.0133527	0.00505851	0.0319521	0	0.00574122
TCGA-CZ-5455-01A-01R-1503-07	TCGA-CZ-5455-01A	TCGA-CZ-5455	63	MALE	G4	Stage IV	T3b	M1	NX	C1	C3	low	1	561	1	561	-0.6588	0	1	1779.59	977.736	-490.254	0.328317	18	94	NA	0.830945	2.09142	0.906753	71	0.116822	5	5	4	0	0.00408096	0	0.00152743	0	0	0.117734	0.348887	0	0.022423	0.0231174	0.0119005	0.033862	0	0.00465479
TCGA-CZ-5461-01A-01R-1503-07	TCGA-CZ-5461-01A	TCGA-CZ-5461	52	MALE	G4	Stage IV	T1b	M1	NX	C1	C3	low	1	330	1	48	-1.3179	0.08	18	1808.84	565.807	-950.71	0.202441	23	20	NA	0.989067	2.10888	1.95007	63	0.588828	3	3	10	0	0.0422003	0	0	0	0	0.0979684	0.293882	0	0.0717689	0.0901734	0.00916184	0.0149171	0	0.00540699
TCGA-CZ-5464-01A-01R-1503-07	TCGA-CZ-5464-01A	TCGA-CZ-5464	69	MALE	G2	Stage IV	T3b	M1	NX	C1	C3	low	0	2128	0	2128	-0.3462	0	14	1533.59	812.509	-558.482	0.260952	NA	NA	0.961584	0.935058	1.49453	0	54	0.635277	5	5	2	0.00371754	0	0	0	0	0.0247843	0.0781409	0.275792	0	0.0156973	0.0152018	0.00972811	0.0732539	0	0.0153377
TCGA-CZ-5470-01A-01R-1503-07	TCGA-CZ-5470-01A	TCGA-CZ-5470	72	FEMALE	G3	Stage II	T2	M0	N0	C1	C3	low	0	386	0	386	-0.5422	0.07	4	-45.9065	874.47	-902.753	0.344305	20	15	0.921339	0.954864	2.35704	1.27208	81	0.186998	6	6	5	0	0.00569259	0	0.010913	0	0	0.086746	0.249912	0	0.055342	0.0228428	0.0110883	0.0760187	0	0.0350423
TCGA-CZ-5984-01A-11R-1672-07	TCGA-CZ-5984-01A	TCGA-CZ-5984	51	MALE	G3	Stage I	T1b	M0	N0	C1	C3	low	0	2067	0	2067	-0.6275	0.19	19	655.856	446.267	-922.215	0.297127	14	4	0.953089	0.963943	1.9884	1.00793	88	0.55803	7	7	2	0	0.0850381	0	0.0619542	0	0	0.0432069	0.263232	0.00523724	0	0.0208335	0.00535332	0	0.0244807	0.100712
TCGA-CZ-5987-01A-11R-1672-07	TCGA-CZ-5987-01A	TCGA-CZ-5987	60	MALE	G2	Stage IV	T3b	M1	NX	C1	C3	low	1	445	1	377	-0.5349	NA	8	1843.06	1098.11	-1062.83	0.280511	16	42	0.570831	0.989204	1.88838	1.23083	77	0.704841	0	0	7	0.0115849	0	0	0	0	0	0.0848801	0.273637	0	0.0103762	0.0766099	0.00680283	0	0.00121736	0.00997534
TCGA-DV-5574-01A-01R-1541-07	TCGA-DV-5574-01A	TCGA-DV-5574	37	MALE	G2	Stage I	T1a	M0	NX	C1	C3	low	0	2016	1	357	-0.8315	NA	NA	-468.553	509.999	-420.175	0.428158	NA	NA	0.662455	0.971681	1.74613	0	45	0.21048	NA	NA	NA	0	0.114211	0	0.00424492	0	0	0.0220348	0.364895	0	0.0237417	0.0120588	0	0.0319976	0	0.0855855
TCGA-DV-5576-01A-01R-1541-07	TCGA-DV-5576-01A	TCGA-DV-5576	55	FEMALE	G2	Stage I	T1a	M0	NX	C1	C3	low	1	727	1	727	-1.5524	NA	2	3063.68	168.19	-635.888	0.0483894	NA	NA	NA	NA	1.50462	0	95	0.0486515	5	5	2	0.0538652	0.0110144	0.0109534	0	0	0	0.0132362	0.205021	0	0.163288	0.131636	0.0135784	0.0107392	0.0679399	0.0153205
TCGA-DV-A4VZ-01A-11R-A266-07	TCGA-DV-A4VZ-01A	TCGA-DV-A4VZ	53	MALE	G2	Stage I	T1a	MX	NX	C1	C3	high	0	365	0	365	-2.3031	0	0	2351.86	-72.046	-592.447	0.0350365	6	3	NA	NA	1.20679	0.268882	49	7.08e-05	0	0	5	0.0154842	0.00347145	0.00223854	0	0	0.05572	0.0134859	0.278489	0	0.0508544	0.0135968	0.00379117	0.0558379	0.0325413	0.144431
TCGA-MM-A84U-01A-11R-A37O-07	TCGA-MM-A84U-01A	TCGA-MM-A84U	58	FEMALE	G2	Stage I	T1a	MX	NX	C1	C3	high	0	700	0	700	-1.4613	0.05	4	894.937	-326.2	-1168.65	0.299259	35	5	0.718835	1	1.73197	1.72968	115	0.185327	5	5	34	0	0.0261915	0	0.00664914	0	0	0.0396936	0.270588	0	0.059373	0.0466187	0	0.106821	0	0.0713615
TCGA-6D-AA2E-01A-11R-A37O-07	TCGA-6D-AA2E-01A	TCGA-6D-AA2E	68	FEMALE	G2	Stage I	T1b	MX	NX	C2	C3	low	0	362	0	362	-2.2812	0	0	2222.06	-443.252	-1905.32	0.32507	12	114	0.887221	1	1.83925	0.491743	49	2.84e-05	0	0	7	0	0.139206	0	0	0	0	0.00444755	0.289493	0.0316922	0	0.0101961	0	0.0536245	0	0.189559
TCGA-A3-3313-01A-02R-1325-07	TCGA-A3-3313-01A	TCGA-A3-3313	59	MALE	G3	Stage I	T1b	M0	N0	C2	C3	high	1	735	0	735	-0.8356	0.34	7	2313.21	-1189.2	-1025.88	0.115027	31	49	NA	1	1.24894	2.41907	296	0.338934	9	9	66	0.0337352	0.0225335	0	0.00335204	0.030918	0.00412917	0.0197475	0.43974	0	0.0253077	0.132309	0	0	0.0863047	0
TCGA-A3-3316-01A-01R-0864-07	TCGA-A3-3316-01A	TCGA-A3-3316	57	MALE	G3	Stage II	T2	M0	NX	C2	C3	high	0	1493	0	1493	-0.9068	0.2	24	897.758	647.416	-479.879	0.221329	18	18	NA	0.972588	1.44804	0.968575	106	0.62785	8	8	7	0	0.022203	0	0	0	0.111634	0.0242914	0.455214	0.0721954	0	0.0633153	0.0321833	0.059889	0	0.00686764
TCGA-A3-3317-01A-02R-1325-07	TCGA-A3-3317-01A	TCGA-A3-3317	67	MALE	G2	Stage II	T2	M0	N0	C2	C3	low	0	1491	1	560	-0.8625	0.01	7	91.5178	-156.488	-109.522	0.211198	34	220	NA	0.925442	1.93313	1.643	178	0.288655	9	9	10	0.0194486	0	0	0.0211006	0	0.0317671	0.104828	0.348228	0	0.0229933	0.0382621	0.00436071	0.0629979	0	0.0120532
TCGA-A3-3319-01A-02R-1325-07	TCGA-A3-3319-01A	TCGA-A3-3319	70	MALE	G2	Stage I	T1b	M0	NX	C2	C3	high	0	1130	0	1130	-0.0892	0.19	14	457.923	528.996	-880.899	0.323327	32	28	0.661874	0.968684	2.06123	1.80163	203	0.403346	9	9	10	0	0.0229392	0.00356132	0	0	0	0.0508277	0.321093	0	0.06599	0.0509989	0.0137458	0	0.0498947	0.0660494
TCGA-A3-3328-01A-01R-0864-07	TCGA-A3-3328-01A	TCGA-A3-3328	79	MALE	G2	Stage I	T1b	M0	N0	C2	C4	low	0	1385	0	1385	-0.8625	NA	NA	2609.38	-1571.44	-1733.4	0.00401145	NA	NA	NA	NA	1.07025	NA	NA	NA	NA	NA	NA	0.0172354	0	0.0049219	0	0.0150081	0.125321	0	0.039134	0	0.181257	0.129359	0.032633	0.00504589	0.228418	0.00322604
TCGA-A3-3329-01A-01R-0864-07	TCGA-A3-3329-01A	TCGA-A3-3329	75	MALE	G2	Stage I	T1b	M0	N0	C2	C3	low	0	1624	0	1624	-1.426	NA	NA	2563.69	220.985	-1372.78	0.143828	NA	NA	NA	0.955686	1.36354	NA	NA	NA	NA	NA	NA	0.00773275	0.00210491	0	0	0	0	0.166072	0.288171	0	0.012214	0.0587857	0.00804584	0.0216749	0	0.0218903
TCGA-A3-3346-01A-01R-1766-07	TCGA-A3-3346-01A	TCGA-A3-3346	68	MALE	G3	Stage I	T1b	M0	NX	C2	C4	high	1	137	1	114	0.035	0.07	13	978.741	-87.5028	-826.727	0.46039	29	64	NA	0.983734	2.35692	2.22227	129	0.959235	9	9	18	0	0.00333402	0	0	0	0.075759	0.0679741	0.39413	0	0.00830206	0.0755649	0.0419812	0.0409674	0	0.00404336
TCGA-A3-3358-01A-01R-1541-07	TCGA-A3-3358-01A	TCGA-A3-3358	57	FEMALE	G2	Stage I	T1a	M0	N0	C2	C3	low	0	1307	0	1307	-0.9803	0.06	9	2060.74	433.791	-1204.54	0.348946	28	80	0.882965	0.935905	2.04575	1.60808	107	0.211023	4	4	19	0.0187983	0.0158008	0.00318218	0.000670715	0	0	0.0400824	0.432513	0.00965464	0.0221399	0.0482077	0	0.0013933	0	0.0164034
TCGA-A3-3363-01A-01R-0864-07	TCGA-A3-3363-01A	TCGA-A3-3363	50	MALE	G2	Stage II	T2	M0	N0	C2	C4	low	0	319	0	319	-1.4183	0	2	931.894	-480.097	-1462.19	0.0991891	23	19	NA	0.985993	2.13772	1.18558	186	0.050962	3	3	13	0.0199802	0.000792773	0	0	0	0	0.00374001	0.641197	0	0.145845	0.0191002	0.0107108	0.00154605	0	0
TCGA-A3-3374-01A-02R-1325-07	TCGA-A3-3374-01A	TCGA-A3-3374	51	FEMALE	G2	Stage I	T1b	M0	N0	C2	C4	high	0	1314	0	1314	-1.8287	NA	28	3779.3	-109.437	-1668.99	0.180623	8	0	NA	1	1.2167	0.332929	151	0.821309	0	0	8	0.00501725	0.00536036	0	0	0	0.642157	0.00255777	0.268572	0	0.0236213	0	0	0	0.0116019	0.000480786
TCGA-AK-3426-01A-02R-1325-07	TCGA-AK-3426-01A	TCGA-AK-3426	37	MALE	G3	Stage III	T3a	M0	N1	C2	C3	high	1	885	1	256	-0.3156	0.06	5	-381.122	388.412	-492.173	0.568735	11	0	NA	0.95286	1.85336	0.679009	47	0.278105	5	5	7	0	0.00766212	0	0.0149596	0	0	0.0754824	0.159955	0	0.0422267	0.0369807	0	0.0719493	0	0.0148493
TCGA-AK-3427-01A-01R-0864-07	TCGA-AK-3427-01A	TCGA-AK-3427	65	MALE	GX	Stage I	T1a	M0	N0	C2	C4	low	0	3583	0	3583	-1.7021	NA	6	1476.86	-1760.56	-1778.19	0.0164123	5	0	NA	NA	1.7565	0.282348	63	0.200923	0	0	4	0.0144869	0	0.0451215	0	0	0	0.0182181	0.318094	0	0.0817504	0.180674	0	0.0287817	0.0113161	0
TCGA-AK-3433-01A-02R-1277-07	TCGA-AK-3433-01A	TCGA-AK-3433	48	FEMALE	GX	Stage II	T2	M0	N0	C2	C3	low	0	3409	0	3409	-1.9369	NA	13	2619.99	-1119.49	-865.649	0.00672508	NA	NA	NA	NA	1.72731	NA	75	0.947705	0	0	11	0	0.0334781	0.00259169	0	0.00286186	0	0.015145	0.297659	0	0.134792	0.0581413	0	0	0.0987406	0.00481723
TCGA-AK-3436-01A-02R-1325-07	TCGA-AK-3436-01A	TCGA-AK-3436	40	MALE	G2	Stage IV	T2	M1	N0	C2	C3	low	0	3331	1	1189	-1.0156	0.37	20	1522.19	-74.2826	-1302.72	0.134399	12	NA	NA	0.937774	0.96937	1.06013	87	0.588788	8	8	7	0	0.0774561	0	0	0	0.039528	0.0208747	0.293396	0	0.0432894	0.00116204	0	0.029987	0	0.0336498
TCGA-AK-3440-01A-02R-1277-07	TCGA-AK-3440-01A	TCGA-AK-3440	58	MALE	G3	Stage I	T1a	M0	NX	C2	C5	low	0	2865	0	2865	-1.6061	0.03	14	3601.54	-1054.35	-1359.05	0.0111654	NA	NA	NA	NA	1.11274	0.472164	63	0.947749	0	0	15	0	0.0153236	0.16013	0	0	0	0	0.313403	0	0.00699437	0.113762	0.00186701	0.0106884	0.0893789	0
TCGA-AK-3443-01A-02R-1325-07	TCGA-AK-3443-01A	TCGA-AK-3443	45	MALE	GX	Stage II	T2	M0	N0	C2	C5	low	0	1423	0	1423	-1.9882	0.01	2	4210.34	-1186.52	-1790.41	0.016855	8	NA	NA	NA	0.873283	0.220214	43	0.0464401	0	0	19	0	0.0555408	0.0258005	0	0	0.0023911	0.0017041	0.349873	0	0.186184	0.123723	0.0247446	0	0.0334051	0
TCGA-AK-3445-01A-02R-1277-07	TCGA-AK-3445-01A	TCGA-AK-3445	69	MALE	G3	Stage III	T3a	M0	NX	C2	C3	high	0	2392	0	2392	-0.8794	NA	9	1737.24	532.047	-1023.86	0.19065	NA	NA	NA	0.98307	2.14613	NA	91	0.319202	7	7	8	0	0.0103304	0	0.00306566	0	0	0.0734251	0.365407	0.00337714	0.0186679	0.00934826	0.0028709	0.0319292	0	0.000794384
TCGA-AK-3447-01A-01R-1766-07	TCGA-AK-3447-01A	TCGA-AK-3447	83	MALE	G2	Stage II	T2	M0	NX	C2	C4	low	0	1217	0	1217	-2.3209	0.02	7	2097.26	-1359.95	-1296.43	0.0336672	NA	NA	NA	NA	0.974795	0	100	0.924073	2	2	8	0.0188051	0	0.00766502	0	0.0172193	0	0.0632475	0.303195	0	0.0629091	0.0122882	0.042762	0.0179624	0.105969	0.00945175
TCGA-AK-3451-01A-02R-1188-07	TCGA-AK-3451-01A	TCGA-AK-3451	48	MALE	G3	Stage II	T2	M0	N0	C2	C2	low	0	2868	0	2868	-1.2771	0	1	1627.15	-497.618	-1280.09	0.248227	39	208	NA	0.89972	1.65027	1.93786	77	0.0838259	4	4	5	0	0.00601231	0	0.065708	0	0.0491008	0.0364505	0.23474	0	0.0377647	0.0288491	0.00048412	0.0197929	0	0.00891537
TCGA-AK-3456-01A-02R-1325-07	TCGA-AK-3456-01A	TCGA-AK-3456	48	MALE	G3	Stage II	T2	M0	N0	C2	C3	low	0	1143	0	1143	-1.8097	0.07	1	2391.66	-867.356	-1919.97	0.200016	10	1	NA	0.94877	1.80215	0.649603	66	0.0383261	2	2	19	0	0.0437753	0	0.0308737	0	0.0849251	0.00980155	0.652569	0	0.0315752	0.0191248	0.00847731	0.00374229	0.00870156	0.0201695
TCGA-AK-3458-01A-01R-1503-07	TCGA-AK-3458-01A	TCGA-AK-3458	48	MALE	G3	Stage I	T1b	M0	NX	C2	C2	low	0	1168	0	1168	-1.0709	0	9	2347.6	-123.693	-1434.55	0.20626	24	53	NA	0.978717	1.87329	0.900521	73	0.306974	4	4	6	0.0374344	0.00597638	0.00194405	0	0	0	0.045977	0.194959	0	0.0492103	0.0504722	0.000288666	0.0318388	0	0.0271904
TCGA-AK-3465-01A-02R-1325-07	TCGA-AK-3465-01A	TCGA-AK-3465	71	FEMALE	GX	Stage I	T1b	M0	NX	C2	C3	high	0	369	0	369	-1.1312	0.06	12	1762.24	-1703.74	-849.156	0.0197007	13	31	NA	0.946395	1.72046	0.700727	90	0.888373	0	0	8	0.0160121	0	0	0.00823465	0	0	0.0911229	0.308255	0	0.131611	0.0479997	0	0.0433768	0.0220453	0.134534
TCGA-AS-3777-01A-01R-0864-07	TCGA-AS-3777-01A	TCGA-AS-3777	63	MALE	NA	Stage I	T1a	M0	NX	C2	C4	high	0	1238	0	1238	-0.3766	0	12	2635.21	-708.353	-360.122	0.140851	NA	NA	NA	0.984859	4.11738	0.494867	55	0.947729	0	0	8	0	0.0505515	0	0	0	0.0031683	0.0713605	0.331405	0	0.072676	0.075204	0	0.0510095	0	0.00254967
TCGA-B0-4688-01A-01R-1277-07	TCGA-B0-4688-01A	TCGA-B0-4688	46	MALE	G4	Stage IV	T4	M1	N0	C2	C4	high	1	101	1	101	0.9864	NA	10	-4996.11	-769.285	1489.76	0.212601	NA	NA	0.817487	1	2.53975	NA	440	0.737406	45	45	124	0	0.013436	0.0171009	0	0	0	0.00271052	0.505436	0	0.0612046	0.0632139	0.0207954	0.0535884	0.0106791	0.0182174
TCGA-B0-4690-01A-01R-1277-07	TCGA-B0-4690-01A	TCGA-B0-4690	65	MALE	G3	Stage IV	T4	M1	N0	C2	C6	high	1	43	1	43	0.2782	NA	11	641.395	747.931	17.7111	0.425728	NA	NA	0.702733	0.917626	2.13954	NA	180	0.443928	18	18	30	0	0.0178113	0	0	0	0	0.0824557	0.279717	0.0257745	0	0.0748763	0.0420578	0.0538633	0	0.00842052
TCGA-B0-4691-01A-01R-1277-07	TCGA-B0-4691-01A	TCGA-B0-4691	55	MALE	G3	Stage IV	T2	M1	N0	C2	C2	high	1	139	1	139	-0.5435	NA	6	515.564	747.978	-720.319	0.286511	NA	NA	0.562306	0.941889	2.50323	NA	86	0.256127	7	7	9	0.00158211	0.00691287	0	0	0	0	0.0749837	0.110059	0.0129429	0	0.0197969	0	0.139824	0	0.0460165
TCGA-B0-4696-01A-01R-1277-07	TCGA-B0-4696-01A	TCGA-B0-4696	58	MALE	G3	Stage III	T3a	M0	N0	C2	C4	high	1	866	1	794	0.7646	NA	10	-4261.68	-1485.9	1278.79	0.0983703	NA	NA	NA	NA	4.98571	NA	340	0.8397	53	53	107	0.00768511	0	0	0	0	0.250723	0.00568362	0.225152	0	0.0327195	0.0188789	0	0	0	0.000372997
TCGA-B0-4697-01A-01R-1277-07	TCGA-B0-4697-01A	TCGA-B0-4697	46	FEMALE	G4	Stage IV	T3b	M1	NX	C2	C3	high	1	578	1	578	-0.5827	NA	NA	-1180.04	697.342	-219.717	0.725585	NA	NA	0.838621	0.981905	2.60862	NA	81	0.00024267	NA	NA	NA	0.0629016	0.036284	0	0	0	0.0113258	0.0785289	0.0547031	0	0.0183747	0.0132669	0	0.0506969	0	0.143219
TCGA-B0-4698-01A-01R-1503-07	TCGA-B0-4698-01A	TCGA-B0-4698	75	MALE	G4	Stage IV	T4	M0	NX	C2	C2	high	1	42	1	42	1.0675	0.16	13	-2399.31	1329.86	1060.69	0.509804	73	14	0.445446	0.877144	3.89245	11.3962	109	0.45835	20	20	17	0	0.000731786	0	0	0	0.0105786	0.061667	0.177695	0.029686	0	0.00168774	0.00760507	0.0723328	0	0.0036321
TCGA-B0-4699-01A-01R-1277-07	TCGA-B0-4699-01A	TCGA-B0-4699	74	MALE	G4	Stage IV	T4	M1	N0	C2	C2	high	1	110	0	110	0.2731	NA	13	652.359	72.1131	-137.465	0.268037	NA	NA	NA	0.803146	2.35065	NA	91	0.918063	4	4	15	0.00482289	0	0	0	0	0	0.0509225	0.300732	0.0107165	0	0.00655235	0.00731489	0.0909744	0	0.00294665
TCGA-B0-4707-01A-01R-1277-07	TCGA-B0-4707-01A	TCGA-B0-4707	63	MALE	G4	Stage III	T3a	M0	NX	C2	C3	high	1	600	1	600	-0.4884	NA	26	1724.56	265.165	-27.9273	0.262872	NA	NA	0.930983	0.878495	2.48817	NA	142	0.717144	25	25	32	0	0.0333841	0	0	0	0	0.0444481	0.0644	0	0.00997324	0.0351828	0	0.0937567	0	0.0558326
TCGA-B0-4712-01A-01R-1503-07	TCGA-B0-4712-01A	TCGA-B0-4712	76	MALE	G3	Stage IV	T3a	M1	NX	C2	C2	high	1	1337	1	1337	0.0399	0.06	25	-1028.88	297.922	-351.955	0.33389	53	13	0.97804	0.93539	1.40509	2.74082	88	0.67997	6	6	14	0	0.0228005	0	0.00125605	0	0	0.101656	0.287917	0	0	0.0189789	0.00846113	0.0584608	0	0
TCGA-B0-4713-01A-01R-1277-07	TCGA-B0-4713-01A	TCGA-B0-4713	76	FEMALE	G2	Stage III	T3b	M0	NX	C2	C3	high	1	202	1	202	-0.8087	NA	6	2975.51	-426.306	-869.423	0.325893	NA	NA	NA	0.95668	2.29221	NA	111	0.35481	17	17	9	0	0.0188941	0	0	0	0	0.0663712	0.136571	0	0.00358997	0.0336805	0	0.0708316	0.0413548	0.0820941
TCGA-B0-4813-01A-01R-1277-07	TCGA-B0-4813-01A	TCGA-B0-4813	68	MALE	G3	Stage III	T3b	M0	NX	C2	C3	high	1	18	0	18	-0.5616	NA	6	1985.77	-671.244	-630.737	0.0802683	NA	NA	NA	NA	1.82734	NA	148	0.784191	28	28	28	0.0185925	0	0.0169832	0	0	0.111982	0	0.428687	0.0685875	0	0.0837232	0	0.0254247	0	0
TCGA-B0-4821-01A-01R-1503-07	TCGA-B0-4821-01A	TCGA-B0-4821	68	FEMALE	G3	Stage III	T3b	M0	N0	C2	C3	high	1	1230	1	1230	-0.4783	0.38	9	937.336	218.517	-1186.86	0.231781	34	15	0.998856	0.956728	1.95285	1.66303	95	0.553411	14	14	20	0.029963	0	0	0	0	0.21838	0.0342327	0.123437	0	0	0	0	0.0944634	0.0538134	0.0443816
TCGA-B0-4834-01A-01R-1305-07	TCGA-B0-4834-01A	TCGA-B0-4834	49	MALE	G3	Stage I	T1a	M0	N0	C2	C3	low	1	2090	0	2090	-1.4831	NA	2	2486.24	-887.871	-928.548	0.0554713	NA	NA	NA	NA	0.790442	NA	85	0.114856	0	0	4	0	0.0292579	0.0104262	0	0	0	0.0170965	0.329747	0	0.0930557	0.0743881	0	0.0240082	0.0665099	0.0026747
TCGA-B0-4841-01A-01R-1277-07	TCGA-B0-4841-01A	TCGA-B0-4841	63	MALE	G3	Stage IV	T2	M1	NX	C2	C3	low	1	204	1	108	-1.4932	NA	3	-674.512	781.179	-769.564	0.084436	NA	NA	NA	0.869916	1.95049	NA	95	0.164884	11	11	5	0	0	0.0108689	0	0	0	0.0520835	0.360754	0	0.0493499	0.0671776	0	0.0762076	0.0379323	0.0150201
TCGA-B0-4842-01A-02R-1420-07	TCGA-B0-4842-01A	TCGA-B0-4842	73	FEMALE	G4	Stage III	T3a	M0	N0	C2	C3	low	1	1724	1	250	-1.4229	0.01	3	2789.74	120.624	-1260.32	0.492802	21	24	NA	0.928694	1.59542	1.43951	64	0.121244	7	7	9	0.00568397	0	0	0.000218799	0	0.0597859	0.0358178	0.177157	0	0.0323498	0.0341835	0.0206412	0.0680032	0	0.0673744
TCGA-B0-5083-01A-02R-1420-07	TCGA-B0-5083-01A	TCGA-B0-5083	63	MALE	G3	Stage I	T1a	M0	N0	C2	C3	low	1	1045	1	1045	-1.9928	NA	NA	1890.28	-894.328	-473.237	0.232513	10	28	NA	0.988453	1.06067	0.488107	NA	NA	NA	NA	NA	0	0.0252108	0	0.0102742	0	0.109289	0.0440842	0.449869	0	0.0175925	0.0122454	0	0.0319097	0	0.00813705
TCGA-B0-5084-01A-01R-1334-07	TCGA-B0-5084-01A	TCGA-B0-5084	33	MALE	G3	Stage IV	T3a	M1	N1	C2	C4	high	1	222	1	65	0.3581	0.05	8	1279.49	-1132.72	-188.734	0.159169	17	41	NA	0.988109	1.66028	1.23317	83	0.902162	15	15	21	0.0432627	0.00399997	0	0	0	0.167323	0.028435	0.351484	0	0.00303031	0.0170585	0.0383985	0.0639488	0	0.0310764
TCGA-B0-5094-01A-01R-1420-07	TCGA-B0-5094-01A	TCGA-B0-5094	62	MALE	G2	Stage IV	T3b	M1	N0	C2	C3	high	1	333	1	75	-1.1135	0.05	12	1331.48	-260.706	-1611.36	0.188037	40	98	NA	0.984338	1.98157	2.12794	105	0.411574	12	12	15	0	0.0407723	0.00283295	0	0	0	0.0270071	0.26363	0	0.0476307	0.0604275	0.0218255	0.0280851	0.0858349	0.0654476
TCGA-B0-5096-01A-01R-1420-07	TCGA-B0-5096-01A	TCGA-B0-5096	72	FEMALE	GX	Stage III	T3a	M0	N1	C2	C3	high	1	68	0	68	-0.584	0	6	1327.94	35.0788	-35.8542	0.451954	21	73	0.652914	0.963064	2.32964	2.09527	108	0.200147	2	2	5	0	0.0544535	0	0	0	0.0198887	0.0380708	0.392938	0.0391887	0	0.0645037	0.0306261	0	0.0352707	0.0711828
TCGA-B0-5097-01A-01R-1420-07	TCGA-B0-5097-01A	TCGA-B0-5097	59	FEMALE	G2	Stage III	T3b	M0	N0	C2	C3	high	0	665	1	359	-0.4181	0.19	6	1816.21	425.892	201.137	0.348615	19	7	NA	0.980796	2.1128	1.64172	67	0.158754	6	6	9	0	0.0329431	0	0	0	0.162083	0.0410487	0.435766	0	0.0348467	0.00626623	0.00197978	0	0.0105713	0.00633009
TCGA-B0-5098-01A-01R-1420-07	TCGA-B0-5098-01A	TCGA-B0-5098	53	FEMALE	G3	Stage I	T1	M0	NX	C2	C1	high	1	1584	0	1584	0.3723	0.01	6	-2854.34	-1564.2	491.679	0.176996	239	817	NA	1	3.30537	16.0516	165	0.918407	9	9	31	0.172986	0	0	0	0	0.0856553	0.0497701	0.0670332	0	0.00914355	0.0579915	0	0.120431	0	0.115249
TCGA-B0-5107-01A-01R-1420-07	TCGA-B0-5107-01A	TCGA-B0-5107	65	FEMALE	G4	Stage IV	T2	M1	N0	C2	C2	high	1	927	1	549	-0.3113	0	5	997.666	-14.2996	-1033.64	0.329316	20	41	NA	0.892754	2.56605	1.42184	97	0.186257	7	7	17	0.0233641	0	0	0	0	0	0.0777554	0.2005	0.0113725	0	0.0195686	0	0.0846949	0	0.00822406
TCGA-B0-5109-01A-02R-1420-07	TCGA-B0-5109-01A	TCGA-B0-5109	69	MALE	G4	Stage III	T3b	M0	N1	C2	C1	high	1	587	1	70	0.4798	0.08	21	-1395.55	344.577	522.394	0.593089	16	18	0.782869	0.91986	2.84429	1.16708	148	0.766519	34	34	69	0	0.0203771	0	0.000179405	0	0.0537621	0.0753563	0.128582	0.0039741	0.00305245	0.0234996	0.0141824	0.104336	0	0.0404048
TCGA-B0-5116-01A-02R-1420-07	TCGA-B0-5116-01A	TCGA-B0-5116	52	MALE	G3	Stage III	T3b	M0	N0	C2	C3	low	0	1274	1	1129	-0.4373	0.07	11	2520.29	207.152	-561.943	0.128214	26	279	NA	NA	1.38277	1.58775	107	0.375479	7	7	16	0	0.0159432	0	0	0	0	0.0621205	0.305536	0	0.0144278	0.0175712	0	0.121708	0	0
TCGA-B0-5117-01A-01R-1420-07	TCGA-B0-5117-01A	TCGA-B0-5117	40	MALE	G2	Stage I	T1b	M0	NX	C2	C3	high	0	1608	0	1608	-1.5604	0.04	10	1948.84	-1066.54	-1367.75	0.0516629	4	11	NA	0.918296	1.41866	0.287996	110	0.914817	1	1	6	0	0.0204442	0.00836513	0	0.00966348	0.0170153	0.0256729	0.212311	0	0.216307	0.0873184	0	0.0730677	0.0194187	0.00451783
TCGA-B0-5400-01A-01R-1503-07	TCGA-B0-5400-01A	TCGA-B0-5400	59	FEMALE	G4	Stage III	T3b	M0	N0	C2	C3	high	0	1733	0	1733	-1.4688	0.09	2	1504.14	605.964	-816.977	0.545774	14	0	NA	0.954523	1.86681	0.924519	49	0.0987391	2	2	2	0.000383473	0	0	0	0	0.057728	0.024784	0.278428	0.0476498	0	0.0168549	0.0379083	0.156609	0	0.0300279
TCGA-B0-5402-01A-01R-1503-07	TCGA-B0-5402-01A	TCGA-B0-5402	64	MALE	G4	Stage IV	T4	M0	NX	C2	C3	low	0	1290	1	444	-1.4587	0.01	5	2898.75	412.608	-1326.95	0.159644	23	0	0.575557	0.925394	2.05923	1.41608	53	0.281386	15	15	5	0	0.103687	0	0	0	0	0.160281	0.236388	0.0474739	0	0.046463	0.00249607	0.0913928	0.000746866	0.0194319
TCGA-B0-5702-01A-11R-1541-07	TCGA-B0-5702-01A	TCGA-B0-5702	71	MALE	G2	Stage I	T1b	M0	N0	C2	C3	low	0	2172	0	2172	-2.3775	NA	NA	626.026	3.28058	-806.007	0.273396	22	93	NA	NA	2.16665	1.59616	66	0.0919226	NA	NA	NA	0.0120448	0.0144306	0	0	0	0	0.00523499	0.289877	0.0145525	0.00723799	0.111681	0	0.117638	0	0.0613865
TCGA-B0-5707-01A-11R-1541-07	TCGA-B0-5707-01A	TCGA-B0-5707	39	FEMALE	G3	Stage I	T1a	M0	N0	C2	C3	high	0	3744	0	3744	-1.9798	NA	NA	539.919	-194.805	-1553.91	0.193313	18	2	NA	1	1.92119	0.722872	NA	NA	NA	NA	NA	0	0.0357188	0	0	0	0.0772863	0.00782481	0.457272	0	0.0494623	0.0365944	0.00559721	0.0527392	0	0.0731025
TCGA-B2-3923-01A-02R-1325-07	TCGA-B2-3923-01A	TCGA-B2-3923	59	MALE	G2	Stage II	T2	M0	NX	C2	C3	low	0	992	0	992	-1.8779	0	10	2500.6	-1263.01	-882.191	0.0592516	10	0	NA	0.946395	1.48086	0.486992	67	0.94773	0	0	5	0	0.0258087	0	0.00196707	0.0173246	0	0.0364603	0.469028	0	0.060261	0.116882	0	0	0.0487189	0
TCGA-B2-4099-01A-02R-1188-07	TCGA-B2-4099-01A	TCGA-B2-4099	83	MALE	G3	Stage I	T1a	M0	NX	C2	C4	low	0	972	0	972	-0.9849	0.18	1	1567.9	69.6537	-1368.34	0.15541	33	32	NA	0.985046	1.78947	1.51607	61	0.0711467	5	5	19	0	0.0215605	0	0.00205771	0	0	0.104422	0.336038	0	0.0308317	0.157862	0.00840964	0.0336256	0.0437203	0.00816491
TCGA-B4-5832-01A-11R-1672-07	TCGA-B4-5832-01A	TCGA-B4-5832	65	MALE	G2	Stage III	T3b	M0	N0	C2	C4	high	0	155	0	155	-0.952	0.19	24	-1456.26	158.058	475.201	0.383206	28	41	0.800958	0.984859	1.78785	1.72263	75	0.615779	11	11	5	0	0.03385	0	0	0.018317	0	0.0765864	0.287297	0	0.0281104	0.117065	0.00221343	0.0217717	0	0
TCGA-B4-5835-01A-11R-1672-07	TCGA-B4-5835-01A	TCGA-B4-5835	64	FEMALE	G2	Stage I	T1	M0	N0	C2	C4	high	0	16	0	16	-0.1752	0.18	11	610.619	-749.806	-380.361	0.330411	35	69	0.961032	0.995192	1.90998	2.0179	109	0.377282	11	11	25	0.00395157	0.00891566	0	0	0	0.0217332	0.0488048	0.506357	0	0.0155911	0.0536245	0.000170774	0.0370437	0	0
TCGA-B8-4143-01A-01R-1188-07	TCGA-B8-4143-01A	TCGA-B8-4143	66	FEMALE	G3	Stage IV	T3a	M1	N0	C2	C2	high	1	709	1	709	-0.1548	0.35	10	787.712	458.684	-772.143	0.286328	33	50	0.912761	0.908878	1.2752	1.67308	1849	0.411145	18	18	16	0	0.0717916	0	0	0	0.0481257	0.120237	0.134445	0.0262979	0	0.020832	0	0.0161955	0	0.0549575
TCGA-B8-4146-01B-11R-1672-07	TCGA-B8-4146-01B	TCGA-B8-4146	41	FEMALE	G2	Stage I	T1b	M0	NX	C2	C4	low	0	511	0	511	-0.2333	0.04	1	899.819	673.322	441.002	0.206207	17	34	NA	0.53984	1.20136	0.93392	75	0.108195	12	12	8	0	0.00481581	0.0315048	0.00471643	0.00527456	0.0133526	0.161986	0.305832	0	0.0422583	0	0	0.0408474	0	0
TCGA-B8-4154-01A-01R-1188-07	TCGA-B8-4154-01A	TCGA-B8-4154	73	FEMALE	G2	Stage I	T1a	M0	N0	C2	C3	low	0	1380	0	1380	-1.1197	0	1	2489.23	-15.2995	-1299.13	0.162999	15	53	NA	0.874031	1.60449	1.29702	95	0.0328313	5	5	4	0	0.00498204	0	0.0184558	0	0	0.153988	0.241822	0	0.0259367	0.0681956	0.00145094	0.0126206	0.0492332	0.00973587
TCGA-B8-4619-01A-02R-1325-07	TCGA-B8-4619-01A	TCGA-B8-4619	58	MALE	G2	Stage I	T1a	M0	N0	C2	C3	high	0	523	0	523	-1.7738	0	4	1908.66	-1736.14	-668.019	0.0662417	11	0	0.90084	1	1.24547	0.425876	61	0.179184	0	0	3	0	0.312197	0.00546491	0	1.26e-05	0	0.0277731	0.152432	0	0.109268	0.0555726	0	0.00449875	0	0.109993
TCGA-B8-4621-01A-01R-1503-07	TCGA-B8-4621-01A	TCGA-B8-4621	63	MALE	G3	Stage I	T1b	M0	N0	C2	C3	high	0	788	0	788	-1.5779	0.01	12	1210.35	-23.8756	-1952.46	0.322793	19	49	NA	0.973101	1.98925	2.05827	108	0.254801	2	2	4	0.0258611	0.00145696	0	0	0	0	0	0.713784	0	0.0678766	0.071726	0.012097	0.00269277	0	0.00669528
TCGA-B8-5546-01A-01R-1541-07	TCGA-B8-5546-01A	TCGA-B8-5546	38	FEMALE	G2	Stage I	T1b	M0	N0	C2	C3	high	0	505	0	505	-1.7853	0	0	3512.08	-390.542	-791.715	0.072892	4	NA	NA	1	1.68908	0.27956	57	0.000250297	0	0	0	0	0.0351919	0.00105152	0	0	0	0	0.348258	0	0.025362	0.0769845	0	0.0521132	0	0.00820442
TCGA-B8-A54E-01A-11R-A266-07	TCGA-B8-A54E-01A	TCGA-B8-A54E	62	FEMALE	G3	Stage I	T1b	MX	NX	C2	C4	low	0	909	0	909	-1.7016	0	4	1712.79	-993.128	-1676.18	0.448666	27	73	NA	1	2.67726	1.12776	57	0.095903	2	2	11	0.0073087	0.00670653	0.0105648	0	0	0	0.043196	0.4145	0	0.0126115	0.0779273	0	0.0538164	0	0.0528148
TCGA-B8-A54I-01A-21R-A33J-07	TCGA-B8-A54I-01A	TCGA-B8-A54I	48	MALE	G3	Stage I	T1b	MX	NX	C2	C3	high	0	150	0	150	-1.1419	0	18	578.124	372.207	-1759.77	0.504177	26	36	0.68644	0.995151	1.96362	1.31481	87	0.591512	6	6	41	0.0759438	0	0.0120153	0.0325621	0	0	0.0113989	0.292321	0	0.0502431	0.0419436	0	0.013512	0.0530902	0.0867026
TCGA-BP-4334-01A-01R-1289-07	TCGA-BP-4334-01A	TCGA-BP-4334	56	MALE	G3	Stage III	T3a	M0	N0	C2	C5	high	1	645	1	442	-2.0053	NA	10	2838.37	-882.35	-1666.85	0.0569182	NA	NA	NA	NA	1.5243	NA	115	0.947732	3	3	8	0.0722244	0	0.0242222	0	0	0	0.0129873	0.288506	0	0.104959	0.166728	0.00459807	0.0722859	0.0602476	0.00625832
TCGA-BP-4338-01A-01R-1289-07	TCGA-BP-4338-01A	TCGA-BP-4338	43	MALE	G3	Stage I	T1b	M0	N0	C2	C3	high	0	2859	1	1757	-0.5205	NA	NA	2719.04	10.9263	-1361.43	0.20849	NA	NA	0.8066	0.986428	1.56445	NA	98	0.825672	NA	NA	NA	0.00178972	0.00719784	0.0177664	0	0	0	0.00268149	0.590913	0	0.0694693	0.00685101	0.0151656	0.0126218	0	0.0156363
TCGA-BP-4343-01A-02R-1289-07	TCGA-BP-4343-01A	TCGA-BP-4343	64	MALE	G3	Stage III	T3a	M0	N0	C2	C3	high	1	1912	1	330	-0.7422	NA	17	81.1889	409.29	-181.827	0.340132	NA	NA	0.90954	0.968966	1.85861	NA	129	0.513724	5	5	7	0	0.0214386	0	0.0202984	0	0.0378747	0.153485	0.326873	0	0.0603374	0	0.00707595	0.0103548	0	0.00303833
TCGA-BP-4352-01A-01R-1289-07	TCGA-BP-4352-01A	TCGA-BP-4352	74	FEMALE	G4	Stage IV	T3b	M1	N0	C2	C1	high	1	344	1	13	-0.5102	NA	22	-1170.64	945.488	-1042.94	0.147285	NA	NA	0.911074	1	2.46752	NA	246	0.934237	23	23	27	0.0316197	0	0.0184015	0	0	0	0.0215022	0.201278	0	0.0427782	0.0543959	0.00439627	0.0803208	0.0388523	0.24056
TCGA-BP-4354-01A-02R-1289-07	TCGA-BP-4354-01A	TCGA-BP-4354	40	MALE	G4	Stage IV	T4	M1	N1	C2	C4	high	1	1034	1	685	-0.0628	NA	4	-2528.48	30.0022	-163.688	0.674897	NA	NA	NA	0.997092	2.46251	NA	72	0.197553	9	9	9	0	0	0	0	0	0	0.048694	0.510343	0	0.00761897	0.143021	0.0876373	0.00273603	0	0.00533336
TCGA-BP-4756-01A-01R-1289-07	TCGA-BP-4756-01A	TCGA-BP-4756	62	FEMALE	G2	Stage I	T1b	M0	N0	C2	C3	low	0	374	0	374	-1.3715	NA	9	3893.02	-753.673	-2046.43	0.0951077	NA	NA	0.886248	0.963847	2.19152	NA	101	0.328982	2	2	19	0.0160891	0.00342235	0	0.064329	0	0	0.117254	0.332084	0.066458	0	0.00666482	0	0.04246	0	0.0390903
TCGA-BP-4761-01A-01R-1289-07	TCGA-BP-4761-01A	TCGA-BP-4761	57	MALE	G4	Stage III	T3a	M0	N1	C2	C3	high	0	182	0	182	-0.8465	NA	11	3276.18	234.842	-1588.99	0.267001	NA	NA	0.671845	0.959899	2.28813	NA	230	0.538022	27	27	47	0	0	0	0	0	0.0061555	0.0480318	0.126707	0	0.0141557	0.0204466	0	0.0976633	0	0.0807297
TCGA-BP-4770-01A-01R-1503-07	TCGA-BP-4770-01A	TCGA-BP-4770	73	FEMALE	G4	Stage IV	T4	M0	N0	C2	C1	high	1	329	1	169	0.0601	0.22	12	-3243.07	215.748	1154.47	0.262734	30	NA	NA	0.921249	4.09186	1.33745	95	0.899948	14	14	54	0	0.00659429	0	0	0	0.315838	0.0186967	0.402828	0	0.0126103	0	0	0.00345741	0	0
TCGA-BP-4781-01A-01R-1305-07	TCGA-BP-4781-01A	TCGA-BP-4781	78	MALE	G3	Stage I	T1a	M0	NX	C2	C3	high	0	2080	0	2080	-0.9953	NA	NA	2696.98	1090.84	-1265.51	0.130151	NA	NA	NA	0.983243	1.78627	NA	111	0.457284	NA	NA	NA	0	0.00500823	0	0	0.00209338	0.0811849	0.0326901	0.482458	0.143063	0	0.0209586	0.0273229	0.0445692	0	0.00471359
TCGA-BP-4787-01A-01R-1305-07	TCGA-BP-4787-01A	TCGA-BP-4787	59	FEMALE	G4	Stage IV	T3a	M1	N0	C2	C3	high	1	480	1	259	-0.8669	NA	16	1218.65	812.136	-1005.67	0.296862	NA	NA	NA	0.95819	2.09015	NA	96	0.503269	15	15	17	0	0.0101597	0	0	0	0.0219333	0.0408286	0.465995	0.0438171	0	0.0410415	0.0521537	0.0335518	0	0.00182342
TCGA-BP-4797-01A-01R-1305-07	TCGA-BP-4797-01A	TCGA-BP-4797	34	MALE	G3	Stage III	T3b	M0	N0	C2	C3	low	0	1107	0	1107	-0.8367	NA	14	1733.46	307.315	-905.74	0.415658	NA	NA	NA	0.947377	1.52559	NA	111	0.363773	7	7	3	0.000346196	0	0	0	0	0.0148515	0.0489776	0.325476	0	0.0163056	0.0517746	0.0261041	0.0741742	0	0.0140449
TCGA-BP-4799-01A-01R-1305-07	TCGA-BP-4799-01A	TCGA-BP-4799	70	MALE	G3	Stage III	T3b	M0	N0	C2	C6	high	1	1133	1	352	-1.6984	NA	25	-619.951	1067.75	-510.556	0.530765	NA	NA	0.780867	0.94599	1.07436	NA	55	0.632743	5	5	8	0	0.0121082	0	0	0	0.0579973	0.0456981	0.176812	0.0804847	0	0.0062095	0.00385508	0.0391693	0	0.0632711
TCGA-BP-4967-01A-01R-1334-07	TCGA-BP-4967-01A	TCGA-BP-4967	76	MALE	G2	Stage III	T3a	M0	N0	C2	C3	low	0	205	0	205	-0.6938	0.28	11	1073.4	297.981	-1037.24	0.102856	33	15	0.884508	0.979845	1.71682	1.55932	206	0.248897	3	3	14	0	0.0558135	0	0	0	0	0.0519683	0.331795	0	0.0467203	0.0433405	0.0184743	0.0492057	0.00584246	0.0322515
TCGA-BP-4977-01A-01R-1334-07	TCGA-BP-4977-01A	TCGA-BP-4977	57	MALE	G3	Stage I	T1b	M0	NX	C2	C3	low	0	454	0	454	-0.7864	0.05	11	2487.99	490.336	-1313.29	0.184698	19	52	NA	1	2.39449	1.02107	73	0.297871	7	7	2	0.00704631	0	0	0	0	0.0485694	0.0849495	0.370548	0	0.0537254	0.0286974	0.000271306	0.0258144	0	0.0163703
TCGA-BP-4983-01A-01R-1334-07	TCGA-BP-4983-01A	TCGA-BP-4983	67	FEMALE	G4	Stage III	T3a	M0	NX	C2	C2	high	0	1413	0	1413	0.4398	0.69	3	-737.889	476.38	286.042	0.592264	37	8	0.79741	0.931924	1.93858	1.86637	102	0.350813	8	8	14	0	0.000825451	0	0.0298107	0	0.0803227	0.0531727	0.199826	0.00132507	0	0.00803998	0.00664856	0.0978663	0	0.027033
TCGA-BP-4985-01A-01R-1334-07	TCGA-BP-4985-01A	TCGA-BP-4985	72	MALE	G4	Stage III	T3a	M0	N0	C2	C1	high	1	952	1	205	-0.8394	0.1	22	1903.5	1009.5	-950.126	0.214478	42	41	NA	1	3.13631	2.05409	113	0.674539	11	11	24	0	0.0423336	0.0309335	0	0	0.0779862	0.0514361	0.309055	0.131435	0	0.0276757	0.0128418	0.0831873	0	0.00280083
TCGA-BP-4992-01A-01R-1334-07	TCGA-BP-4992-01A	TCGA-BP-4992	66	MALE	G4	Stage I	T1b	M0	NX	C2	C3	high	0	501	0	501	-1.172	0.01	14	-365.13	178.887	-1555.18	0.42166	25	1	NA	0.95633	2.57394	0.946805	61	0.375562	0	0	2	0.00492284	0.00618954	0	0	0	0.0067397	0.051438	0.134214	0.00902268	0	0.0222148	0	0.0381382	0	0.0840213
TCGA-BP-4994-01A-01R-1334-07	TCGA-BP-4994-01A	TCGA-BP-4994	54	MALE	G3	Stage I	T1a	M0	NX	C2	C3	high	0	1308	0	1308	-1.84	0.25	16	2436.7	89.1365	-1618.12	0.145348	5	10	0.837789	0.965046	1.89256	0.316793	63	0.94773	0	0	11	0	0.0605778	0	0	0	0	0.0488222	0.293879	0.0969032	0	0.0790206	0.00770833	0.111047	0	0.0278025
TCGA-BP-5169-01A-01R-1426-07	TCGA-BP-5169-01A	TCGA-BP-5169	70	MALE	G4	Stage I	T1b	M0	N0	C2	C2	high	0	193	0	193	-0.7945	0.91	7	2726.43	-483.37	-1287.56	0.560206	15	3	0.903627	0.976609	2.3523	1.30391	54	0.367389	7	7	6	0	0.0367245	0.000439494	0.0141977	0	0	0.0471521	0.140255	0	0.0157295	0.0228434	0.0102153	0.0186517	0.0100255	0.3135
TCGA-BP-5175-01A-01R-1426-07	TCGA-BP-5175-01A	TCGA-BP-5175	60	MALE	G3	Stage I	T1a	M0	NX	C2	C6	high	0	932	0	932	-0.7489	0.49	19	2230.25	212.981	-861.112	0.314649	17	23	NA	0.985588	1.74287	1.04416	90	0.656016	8	8	5	0	0.000425561	0	0	0	0	0.0366376	0.281813	0	0.0074429	0.0164381	0.0139133	0.0324046	0	0.00487475
TCGA-BP-5191-01A-01R-1426-07	TCGA-BP-5191-01A	TCGA-BP-5191	79	MALE	G2	Stage III	T3a	M0	N0	C2	C3	low	0	967	0	967	-1.03	0	14	1194.38	919.616	-1159.11	0.448628	19	15	0.873273	0.986648	1.69824	1.35178	61	0.39909	2	2	4	0.00601218	0	0	0	0	0.0825503	0.0435668	0.273602	0	0.000853314	0.0127863	0	0.0419774	0.00952012	0.0576872
TCGA-BP-5196-01A-01R-1426-07	TCGA-BP-5196-01A	TCGA-BP-5196	53	MALE	G2	Stage I	T1a	M0	NX	C2	C3	high	0	1018	0	1018	-0.8871	0	12	-84.5734	277.089	-632.514	0.339872	20	10	0.753968	0.802014	1.66123	1.12522	81	0.804088	9	9	5	0	0.00611288	0	0	0	0	0.0341891	0.207668	0.0649023	0	0.0142959	0.00463734	0.107406	0	0.00957542
TCGA-CJ-4891-01A-01R-1305-07	TCGA-CJ-4891-01A	TCGA-CJ-4891	57	FEMALE	G4	Stage III	T3c	M0	N0	C2	C6	high	1	819	0	819	-1.467	NA	3	885.35	530.15	-1275.4	0.716813	NA	NA	0.774515	0.971865	2.06584	NA	62	0.0840943	2	2	2	0	0.0220438	0.0326359	0	0	0.00941075	0.0334015	0.366804	0.0121343	0	0.267845	0.00523325	0	0.0344938	0.02206
TCGA-CJ-4912-01A-01R-1426-07	TCGA-CJ-4912-01A	TCGA-CJ-4912	61	MALE	G3	Stage II	T2	M0	NX	C2	C3	low	0	1657	0	1657	-1.4567	0.02	8	2336.46	-165.659	-1366.62	0.177074	36	65	0.945175	1	2.33395	1.82296	126	0.32148	10	10	7	0.088808	0	0	0	0	0.0359756	0.0017856	0.264761	0	0.0784024	0.0716736	0.00726201	0	0.0754658	0.118726
TCGA-CJ-5677-01A-11R-1541-07	TCGA-CJ-5677-01A	TCGA-CJ-5677	54	FEMALE	G4	Stage IV	T3a	M1	NX	C2	C6	high	1	782	1	288	-0.3879	0.08	6	811.273	276.054	-777.172	0.324895	32	32	0.772289	0.967354	2.05011	1.77665	79	0.245789	12	12	12	0	0.0212791	0	0	0	0.0906815	0.0319356	0.488461	0	0.0202997	0.102636	0	0.0263432	0	0.0112427
TCGA-CJ-5679-01A-11R-1541-07	TCGA-CJ-5679-01A	TCGA-CJ-5679	73	MALE	G4	Stage III	T3b	M0	NX	C2	C3	high	1	679	1	595	-0.7471	0.13	22	2364.3	716.46	-913.487	0.120344	35	11	0.990546	0.918296	1.81766	2.36828	74	0.714783	2	2	16	0.00760913	0	0.015333	0	0	0.519677	0.00397738	0.13225	0	0.0278409	0	0	0.0364404	0.0111853	0.00132364
TCGA-CJ-5681-01A-11R-1541-07	TCGA-CJ-5681-01A	TCGA-CJ-5681	44	FEMALE	G3	Stage IV	T3a	M1	NX	C2	C4	high	1	552	1	17	-0.3298	0	0	3778.52	-688.412	-732.505	0.119582	11	78	NA	1	1.82673	0.55344	1155	0.0780576	7	7	56	0.0357297	0	0.0141467	0.351374	0.000409107	0.0428868	0	0.315715	0	0.031737	0.0485813	0.00447666	0.0251074	0	0
TCGA-CJ-6028-01A-11R-1672-07	TCGA-CJ-6028-01A	TCGA-CJ-6028	58	MALE	G4	Stage IV	T3a	M1	NX	C2	C3	high	1	1625	1	137	-0.4782	0.57	31	-570.933	819.452	-540.915	0.429777	27	20	0.630508	0.880554	1.70772	1.34816	34	0.409324	3	3	2	0	0.0356698	0	0	0	0.0435884	0.0536036	0.248355	0	0.00391798	0.000544811	0.0129507	0.0338206	0	0.0450358
TCGA-CW-5591-01A-01R-1541-07	TCGA-CW-5591-01A	TCGA-CW-5591	56	MALE	G2	Stage IV	T3a	M1	N0	C2	C3	high	0	2271	0	2271	-1.5305	0.22	23	813.801	-399.531	-768.717	0.268929	15	92	NA	1	1.95903	0.834761	85	0.947724	3	3	5	0	0.0414127	0	0	0	0	0.0207889	0.379517	0	0.0958125	0.155295	0	0.0515703	0	0
TCGA-CW-6087-01A-11R-1672-07	TCGA-CW-6087-01A	TCGA-CW-6087	61	MALE	G4	Stage IV	T3a	M1	N1	C2	C3	high	1	41	0	41	0.2577	NA	NA	1178.47	1081.02	233.553	0.609795	38	36	0.946706	0.743679	1.41987	1.51914	55	0.162913	NA	NA	NA	0	0.0723348	0	0.0117876	0	0	0.103833	0.158432	0	0.0120504	0.0145858	0.0144302	0.072317	0	0.0299233
TCGA-CW-6097-01A-11R-1672-07	TCGA-CW-6097-01A	TCGA-CW-6097	32	MALE	G4	Stage III	T3a	M0	NX	C2	C3	high	1	571	1	457	-0.3001	0.35	1	245.651	321.422	-150.528	0.533713	12	7	0.888862	0.991721	2.05069	0.532841	53	0.299876	1	1	0	0	0.129559	0	0.0145897	0	0	0.0767217	0.198423	0	0.0248983	0.0274869	0.00485948	0.013689	0	0.0634884
TCGA-CZ-4854-01A-01R-1305-07	TCGA-CZ-4854-01A	TCGA-CZ-4854	68	MALE	G2	Stage I	T1b	M0	N0	C2	C3	high	1	1404	0	1404	-0.8041	NA	29	769.239	161.1	-946.53	0.179084	NA	NA	0.686519	0.988834	2.35583	NA	126	0.89012	18	18	19	0.0174662	0.0206626	0	0	0	0.106817	0.0392427	0.232732	0.0209587	0	0.0185946	0	0	0.055651	0.0425722
TCGA-CZ-4857-01A-01R-1305-07	TCGA-CZ-4857-01A	TCGA-CZ-4857	56	MALE	G3	Stage IV	T3a	M1	N0	C2	C3	high	1	1432	1	188	-0.2739	NA	11	1284.45	178.556	-579.784	0.213167	NA	NA	NA	0.986314	1.91338	NA	82	0.285795	13	13	10	0	0.0333857	0	0.0023196	0	0.00251162	0.0743044	0.380853	0	0.0282379	0.0118103	0.0301339	0.0364776	0	0.00408295
TCGA-CZ-4858-01A-01R-1305-07	TCGA-CZ-4858-01A	TCGA-CZ-4858	39	MALE	G4	Stage II	T2	M0	NX	C2	C2	high	1	2105	1	597	0.5588	NA	23	1745.13	-845.903	605.301	0.340901	NA	NA	0.879817	0.967761	2.12432	NA	211	0.652774	16	16	31	0	0.0234341	0	0.00499393	0	0.0264011	0.0640045	0.202874	0.0045442	0	0.0220033	0.00948919	0.0594822	0	0.0621978
TCGA-CZ-4860-01A-01R-1305-07	TCGA-CZ-4860-01A	TCGA-CZ-4860	60	MALE	G4	Stage IV	T4	M1	NX	C2	C4	high	1	206	1	206	-0.1726	NA	19	3086.03	-951.054	-6.86539	0.137927	NA	NA	0.902036	0.974882	1.77425	NA	132	0.776026	11	11	10	0.00164657	0.00475208	0	0	0	0	0.0389053	0.395505	0.0206112	0	0.0283972	0.00520493	0.0292108	0	0.00355624
TCGA-CZ-4861-01A-01R-1305-07	TCGA-CZ-4861-01A	TCGA-CZ-4861	63	MALE	G2	Stage II	T2	M0	NX	C2	C3	high	1	446	1	446	-0.4423	NA	0	3213.64	852.074	-812.589	0.232903	NA	NA	0.942304	0.955041	1.80762	NA	65	0.141097	5	5	2	0	0.0180518	0	0	0.00707245	8.13e-05	0.107525	0.370742	0.0203823	0	0.0728865	0.0284456	0.0235665	0	0.00670704
TCGA-CZ-5456-01A-01R-1503-07	TCGA-CZ-5456-01A	TCGA-CZ-5456	57	MALE	G3	Stage II	T2	M0	N0	C2	C3	high	0	2422	1	951	-0.7805	0.1	27	441.526	415.906	-1347.55	0.343006	25	48	0.840561	0.989339	1.92156	1.582	61	0.619448	5	5	11	0	0.0474703	0	0.00101728	0	0.0201163	0.0214924	0.41027	0	0	0.0106836	0.016836	0.0514244	0	0.00944114
TCGA-CZ-5466-01A-01R-1503-07	TCGA-CZ-5466-01A	TCGA-CZ-5466	67	MALE	G2	Stage III	T3a	M0	NX	C2	C3	low	0	685	0	685	-0.9074	0	10	2773.59	537.481	-1314.73	0.410573	27	115	NA	0.857965	1.93617	1.67678	54	0.306837	12	12	10	0.00887571	0.0095966	0	0.0342707	0	0.0227772	0.0552872	0.380348	0	0.0192626	0.0251154	0	0.0679859	0	0.00530701
TCGA-CZ-5468-01A-01R-1503-07	TCGA-CZ-5468-01A	TCGA-CZ-5468	84	MALE	G4	Stage IV	T3b	M1	NX	C2	C6	high	1	59	1	59	-0.2133	0.13	17	-118.678	811.464	-476.184	0.373416	59	76	NA	0.969707	1.52386	3.20369	119	0.649232	26	26	36	0	0.000678443	0	0	0	0.21307	0.0217542	0.357978	0.0236562	0	0.00387429	0.0129386	0.0393133	0.011981	0
TCGA-CZ-5469-01A-01R-1503-07	TCGA-CZ-5469-01A	TCGA-CZ-5469	41	MALE	G2	Stage II	T2	M0	N0	C2	C1	high	1	946	1	110	-0.2858	0.04	26	1844.34	256.294	-1037.33	0.0763733	26	2	NA	0.956634	1.98306	1.22292	69	0.843447	4	4	8	0.0335849	0	0.00540834	0.000160214	0.0100901	0	0.00967355	0.271791	0	0.0497496	0.119541	0	0.0298326	0	0.0101213
TCGA-CZ-5989-01A-11R-1672-07	TCGA-CZ-5989-01A	TCGA-CZ-5989	60	MALE	G2	Stage II	T2	M0	N0	C2	C4	low	0	1905	0	1905	-1.0787	NA	2	-610.142	777.097	647.499	0.329015	10	31	NA	0.969631	1.65818	0.962167	61	0.132301	9	9	6	0.0151325	0.00374996	0	0	0	0	0.107127	0.251791	0	0.0198291	0.0603851	0	0.0784063	0	0
TCGA-DV-A4VX-01A-11R-A266-07	TCGA-DV-A4VX-01A	TCGA-DV-A4VX	59	MALE	G4	Stage IV	T3b	MX	N0	C2	C4	high	1	1626	1	1626	-0.6462	0	16	459.55	221.475	-1546.41	0.165017	27	76	NA	0.97957	2.40677	2.0623	87	0.662051	10	10	50	0.000738669	0.000676906	0.0621276	0	0	0.080911	0.0544061	0.197774	0.0157636	0	0.0698185	0.014674	0.00986587	0	0.0190226
TCGA-G6-A5PC-01A-11R-A33J-07	TCGA-G6-A5PC-01A	TCGA-G6-A5PC	54	FEMALE	G4	Stage IV	T1b	M1	N0	C2	C3	low	1	242	1	242	-1.4555	0.4	1	1400.94	-96.7847	-1580.31	0.31395	27	32	NA	0.748464	1.89519	1.3239	67	0.130388	10	10	63	0	0	0	0	0	0	0.0264591	0.171294	0	0	0.0313649	0	0.0454699	0	0.0773581
TCGA-G6-A8L7-01A-11R-A37O-07	TCGA-G6-A8L7-01A	TCGA-G6-A8L7	81	FEMALE	G3	Stage I	T1b	MX	N0	C2	C1	high	0	2133	0	2133	0.0517	0.07	9	1357.85	-447.149	313.125	0.320622	29	82	NA	1	1.58175	1.41546	72	0.263588	11	11	59	0.0252394	0	0	0	0	0.00804407	0.0388562	0.0558224	0	0.0395865	0.0288678	0	0.140255	0.00909635	0.0417152
TCGA-T7-A92I-01A-11R-A37O-07	TCGA-T7-A92I-01A	TCGA-T7-A92I	47	FEMALE	G1	Stage I	T1a	MX	NX	C2	C3	low	0	356	0	356	-1.8544	0.01	2	3977.91	-1216.8	-1678.34	0.272362	23	192	NA	0.969207	1.33876	0.854109	77	0.0779178	4	4	24	0	0	0	0.0228177	0	0	0.0128566	0.337187	0.0347873	0	0.124102	0	0.0503285	0	0.0499223
TCGA-3Z-A93Z-01A-11R-A37O-07	TCGA-3Z-A93Z-01A	TCGA-3Z-A93Z	69	MALE	G2	Stage I	T1a	M0	N0	C3	C3	low	0	385	0	385	-1.3458	0.05	7	2005.26	242.13	-1137.21	0.129826	29	88	NA	1	0.981074	1.85403	63	0.224	5	5	7	0	0.0766326	0.000222545	0.00193022	0	0	0.0914899	0.262987	0	0.0300915	0.0843961	0	0.0317525	0.0190835	0.139223
TCGA-A3-3306-01A-01R-0864-07	TCGA-A3-3306-01A	TCGA-A3-3306	67	MALE	G3	Stage I	T1b	M0	N0	C3	C3	low	0	1120	0	1120	-1.0483	NA	7	2985.24	145.989	-1254.87	0.194667	NA	NA	NA	0.974519	0.990692	NA	108	0.947455	7	7	24	0.0178803	0	0	0.00154665	0	0	0.0842207	0.347779	0	0.0219689	0.0909917	0.017851	0.0571245	0	0.00265901
TCGA-A3-3307-01A-01R-0864-07	TCGA-A3-3307-01A	TCGA-A3-3307	66	MALE	G3	Stage III	T3b	M0	N0	C3	C3	low	0	1436	0	1436	-1.2714	NA	1	1545.44	68.3459	-1010.09	NA	NA	NA	NA	0.898677	1.28246	NA	81	0.0493644	5	5	2	0	0.00532871	0	0	0	0	0.0708171	0.347846	0	0.0181042	0.134682	0.0079018	0.00793939	0	0.0026342
TCGA-A3-3320-01A-02R-1325-07	TCGA-A3-3320-01A	TCGA-A3-3320	52	FEMALE	G1	Stage I	T1b	M0	NX	C3	C3	low	0	1508	0	1508	-1.8744	0.03	1	3251.25	385.666	-1427.3	0.0749829	30	66	NA	0.96838	0.93648	1.93022	126	0.108352	9	9	6	0	0	0	0	0	0	0.0631974	0.325284	0.0599023	0.0179912	0.0426154	0.0309642	0.037796	0	0.0276239
TCGA-A3-3322-01A-02R-1325-07	TCGA-A3-3322-01A	TCGA-A3-3322	51	MALE	G2	Stage I	T1a	M0	NX	C3	C3	low	0	1478	0	1478	-1.0821	0.07	6	3519.48	-318.041	-802.099	0.114679	21	67	NA	0.98666	0.640108	1.18851	216	0.195376	0	0	3	0.0159637	0	0	0.00675066	0	0.0157702	0.0232612	0.549657	0.0171759	0.0111742	0.0655558	0.0029897	0.0232712	0.0267323	0.0218975
TCGA-A3-3323-01A-02R-1325-07	TCGA-A3-3323-01A	TCGA-A3-3323	53	MALE	G1	Stage I	T1b	M0	NX	C3	C3	low	0	1106	0	1106	-1.3329	0.09	1	3543.64	-132.553	-1078.73	0.299217	NA	NA	NA	0.979699	1.40294	1.11898	81	0.051297	6	6	5	0	0.0201558	0	0	0	0	0.0890828	0.351802	0	0.044321	0.0967062	0.00666044	0.0070182	0.0338828	0.0209223
TCGA-A3-3324-01A-02R-1325-07	TCGA-A3-3324-01A	TCGA-A3-3324	51	MALE	G3	Stage I	T1b	M0	NX	C3	C3	low	0	1186	0	1186	-1.4254	NA	6	2345.79	376.867	-1015.99	0.270491	NA	NA	NA	0.927204	1.85011	NA	111	0.213872	0	0	3	0	0.00854352	0.000454122	0.0171671	0	0	0.0451622	0.325691	0	0.0577022	0.0771149	0	0.041992	0	0.00262107
TCGA-A3-3325-01A-01R-0864-07	TCGA-A3-3325-01A	TCGA-A3-3325	52	MALE	G2	Stage I	T1a	M0	NX	C3	C3	low	1	1170	0	1170	-1.0199	NA	22	1834.54	101.897	-758.326	0.191625	NA	NA	0.868933	0.987955	1.60972	NA	119	0.562047	7	7	6	0.0118331	0.00345171	0.000698044	0	0	0	0.034346	0.431575	0	0.0768859	0.0757788	0.00113613	0.023081	5.37e-05	0.0347157
TCGA-A3-3326-01A-01R-0864-07	TCGA-A3-3326-01A	TCGA-A3-3326	47	MALE	G1	Stage I	T1a	M0	NX	C3	C3	low	0	1137	0	1137	-1.1592	0	0	3339.77	-169.24	-1381.68	0.222989	12	17	0.851259	0.984679	1.27601	1.15755	85	0.0418514	5	5	5	0	0.0702986	0	0.0531589	0	0	0.0732415	0.269186	0	0.0548937	0.0858442	0	0	0.0341981	0.0704248
TCGA-A3-3331-01A-02R-1325-07	TCGA-A3-3331-01A	TCGA-A3-3331	86	FEMALE	G2	Stage I	T1	M0	N0	C3	C3	low	0	1485	0	1485	-1.0912	0.03	4	3373.42	601.344	-1128.28	0.178099	39	36	0.593294	0.96892	1.48452	2.42416	91	0.140401	4	4	2	0.0217936	0	0	0	0	0	0.0896816	0.351808	0.102477	0	0.0474981	0.00921462	0.060996	0	0.0126573
TCGA-A3-3335-01A-01R-0864-07	TCGA-A3-3335-01A	TCGA-A3-3335	41	MALE	G4	Stage II	T2a	M0	N0	C3	C3	low	0	1886	1	1098	-1.3712	NA	3	2346.65	764.114	-1656.38	0.231267	NA	NA	NA	1	2.47941	NA	97	0.146144	4	4	5	0.0562529	0	0.0235276	0	0	0.00998452	0.0211439	0.388275	0.000557075	0	0.0246549	0.0332037	0	0.0199511	0.0252064
TCGA-A3-3343-01A-01R-0864-07	TCGA-A3-3343-01A	TCGA-A3-3343	79	MALE	G3	Stage II	T2	M0	N0	C3	C3	low	0	945	0	945	-1.5907	NA	1	3854.28	-423.435	-1550.24	0.189542	NA	NA	0.773982	0.986464	1.08242	NA	95	0.0514559	5	5	2	0	0.0261528	0.0105633	0	0	0	0.0811054	0.278365	0	0.0475747	0.133591	0	0	0.0609936	0.018617
TCGA-A3-3349-01A-01R-1188-07	TCGA-A3-3349-01A	TCGA-A3-3349	34	FEMALE	G2	Stage I	T1b	M0	N0	C3	C3	low	0	1385	0	1385	-1.2167	NA	NA	2828.23	-203.524	-941.335	0.132324	22	39	NA	0.778901	1.56864	0.921464	76	0.0362661	NA	NA	NA	0	0.126112	0	0	0	0	0.0095848	0.369898	0	0.11011	0.0703859	0.0101206	0.0270158	0.0471376	0.0328559
TCGA-A3-3351-01A-02R-1325-07	TCGA-A3-3351-01A	TCGA-A3-3351	42	MALE	G2	Stage II	T2a	M0	N0	C3	C3	low	0	910	0	910	-1.1412	0	1	3073.27	315.317	-746.617	0.353867	NA	NA	0.977683	0.857154	1.63938	0	90	0.0935474	3	3	4	0.00744448	0	0	0	0	0	0.0548322	0.237227	0	0.0180942	0.118658	0.00921172	0.0569492	0	0.0151605
TCGA-A3-3352-01A-01R-0864-07	TCGA-A3-3352-01A	TCGA-A3-3352	74	MALE	G3	Stage III	T3a	M0	N0	C3	C3	low	1	561	0	561	-1.2922	NA	9	3242.09	-65.7817	-1113.45	0.166747	NA	NA	NA	0.984979	1.91228	NA	85	0.279594	4	4	3	0	0.00354581	0	0.00986644	0	0	0.0921046	0.340084	0	0.0685379	0.10016	0	0.0553917	0.0499091	0.0278714
TCGA-A3-3359-01A-01R-0864-07	TCGA-A3-3359-01A	TCGA-A3-3359	82	FEMALE	G2	Stage I	T1a	M0	N0	C3	C3	low	0	2504	0	2504	-1.2526	NA	1	2202.32	410.541	-1329.17	0.197215	NA	NA	NA	0.846732	0.821336	NA	61	0.0862974	4	4	19	0	0.00649377	0	0	0	0	0.136119	0.243551	0	0.0395509	0.0616024	0.0130371	0.0284546	0	0.031569
TCGA-A3-3362-01A-02R-1325-07	TCGA-A3-3362-01A	TCGA-A3-3362	60	FEMALE	G2	Stage I	T1a	M0	N0	C3	C3	low	0	1559	0	1559	-1.2282	NA	NA	2524.74	211.223	-976.692	0.173486	19	8	NA	0.988594	1.6157	1.30036	49	0.0468422	NA	NA	NA	0	0.019708	0.00100959	0	0	0	0.0620174	0.321013	0	0.0599616	0.100552	0.00919873	0.00559484	0.0216354	0.0127175
TCGA-A3-3365-01A-01R-0864-07	TCGA-A3-3365-01A	TCGA-A3-3365	46	MALE	G2	Stage I	T1a	M0	NX	C3	C3	low	0	873	0	873	-1.3949	NA	NA	208.172	420.957	-651.375	0.167391	21	165	NA	0.971048	1.50858	0.972589	83	0.117117	NA	NA	NA	0.0179557	0.0132177	0.00883957	0	0	0	0.0539569	0.333332	0	0.117806	0.01456	0	0.00920439	0.0416752	0.0388773
TCGA-A3-3367-01A-02R-1420-07	TCGA-A3-3367-01A	TCGA-A3-3367	72	MALE	G3	Stage I	T1b	M0	N0	C3	C3	low	0	2270	0	2270	-1.1044	0.02	1	3159.76	156.192	-1093.98	0.138903	29	109	NA	0.99016	1.40618	1.73012	103	0.0662318	5	5	5	0	0.0455857	0	0.0432489	0	0	0.0689738	0.338572	0	0.0561485	0.059838	0	0.00266894	0.0211483	0.0300916
TCGA-A3-3370-01A-02R-1420-07	TCGA-A3-3370-01A	TCGA-A3-3370	48	FEMALE	G2	Stage I	T1b	M0	N0	C3	C3	low	0	2274	0	2274	-1.0158	0.01	1	2994.36	187.631	-482.772	0.283637	19	5	0.983802	0.899168	1.2673	0.924859	71	0.100529	9	9	6	0	0.00367174	0	0.00290187	0	0	0.0962142	0.279645	0	0.0151449	0.0328267	0.00392425	0.0528156	0	0.0289246
TCGA-A3-3372-01A-02R-1325-07	TCGA-A3-3372-01A	TCGA-A3-3372	64	MALE	G2	Stage III	T3	M0	NX	C3	C3	low	0	735	0	735	-1.1013	0	22	2696.27	-357.097	-873.284	0.257412	NA	NA	NA	0.90621	1.01262	0	74	0.640643	1	1	3	0	0.0156585	0	0	0	0	0.110818	0.272421	0	0.0704259	0.110562	0	0.0444868	0	0.00947247
TCGA-A3-3373-01A-02R-1420-07	TCGA-A3-3373-01A	TCGA-A3-3373	54	FEMALE	G3	Stage I	T1b	M0	N0	C3	C3	low	0	1621	0	1621	-1.2814	0	4	2290.47	-16.7032	-806.112	0.159361	25	74	NA	0.842739	1.56818	1.35842	65	0.136441	6	6	10	0	0.0185784	0	0.0181407	0	0.00484593	0.118105	0.399572	0	0.10492	0.0376145	0.0182861	0.00414467	0.0214263	0.0098697
TCGA-A3-3376-01A-02R-1420-07	TCGA-A3-3376-01A	TCGA-A3-3376	51	MALE	G2	Stage I	T1a	M0	N0	C3	C3	low	1	1696	0	1696	-1.0678	0	0	1944.7	290.517	-304.818	0.212556	34	29	NA	0.961029	1.24442	1.27843	150	0.0466427	5	5	19	0.00445226	0	0.0124747	0	0	0	0.0112287	0.422182	0	0.0842218	0.188329	0.0010896	0.0176161	0.0285439	0.0256111
TCGA-A3-3380-01A-01R-0864-07	TCGA-A3-3380-01A	TCGA-A3-3380	54	MALE	G2	Stage I	T1	M0	N0	C3	C3	low	0	567	0	567	-1.4644	0.04	10	1846.2	141.147	-793.248	0.121522	16	10	NA	0.962704	1.09289	0.718585	77	0.304276	10	10	8	0.0263087	0.00625848	0.0155416	0.00345238	0	0	0.00557581	0.411709	0	0.0681956	0.0801521	0.0127031	0	0.133555	0.0138803
TCGA-A3-3382-01A-02R-1325-07	TCGA-A3-3382-01A	TCGA-A3-3382	69	MALE	G3	Stage I	T1b	M0	NX	C3	C3	high	0	574	1	514	-1.4383	0.01	24	2897.71	306.008	-1047.85	0.159159	31	62	NA	0.99016	1.72683	2.35187	120	0.706442	3	3	14	0	0.00961483	0.00338775	0	0	0	0.0647728	0.38971	0	0.00462237	0.0191303	0	0	0.0064145	0.00658709
TCGA-A3-3383-01A-02R-1325-07	TCGA-A3-3383-01A	TCGA-A3-3383	52	MALE	G2	Stage I	T1	M0	NX	C3	C2	low	0	861	0	861	-0.9724	0	1	2972.06	493.919	-1465.29	0.15697	20	132	NA	0.900119	1.71705	1.18256	71	0.0802596	2	2	19	0	0	0	0.0566075	0	0	0.078758	0.267838	0	0.0372189	0.0741662	0.0010214	0.0262364	0	0.0159912
TCGA-A3-3385-01A-02R-1420-07	TCGA-A3-3385-01A	TCGA-A3-3385	46	FEMALE	G2	Stage I	T1a	M0	N0	C3	C3	low	0	1993	0	1993	-0.7591	0	7	3094.79	-1049.85	-1100.1	0.028877	27	197	NA	1	1.13303	1.50857	81	0.159768	4	4	4	0	0.0230905	0	0.17884	0	0	0.0149937	0.36155	0	0.101424	0.0563997	0.0317499	0	0.0470786	0.00350195
TCGA-A3-A6NI-01A-11R-A33J-07	TCGA-A3-A6NI-01A	TCGA-A3-A6NI	47	MALE	G3	Stage I	T1a	MX	NX	C3	C3	low	0	1018	0	1018	-1.163	0.43	3	2416.24	-134.601	-1247.02	0.178024	22	37	NA	1	2.09538	1.6016	318	0.132424	16	16	228	0.0182531	0	0	0	0	0	0.038342	0.545481	0	0.0295941	0.0988348	0.00784932	0.0201808	0.0666669	0.00663282
TCGA-A3-A6NJ-01A-12R-A33J-07	TCGA-A3-A6NJ-01A	TCGA-A3-A6NJ	57	FEMALE	G1	Stage I	T1a	MX	NX	C3	C3	low	0	468	0	468	-1.6378	0	1	2018.77	804.924	-1263.18	0.345177	26	36	0.976388	0.850829	1.54217	1.11333	110	0.0512638	4	4	19	0	0.0092282	0	0.00305297	0	0	0.0794716	0.21973	0	0.0108029	0.0455937	0	0.0600701	0	0.0200269
TCGA-A3-A6NL-01A-11R-A33J-07	TCGA-A3-A6NL-01A	TCGA-A3-A6NL	49	FEMALE	G2	Stage I	T1b	MX	NX	C3	C3	low	0	689	0	689	-1.2873	0.03	3	2918.61	369.279	-1149.2	0.231827	22	NA	NA	1	0.961934	0.8044	115	0.0967335	4	4	25	0	0.0593733	0	0	0	0	0.0598871	0.331273	0	0.026019	0.0686624	0.0168449	0	0.0741613	0.0520418
TCGA-A3-A6NN-01A-12R-A33J-07	TCGA-A3-A6NN-01A	TCGA-A3-A6NN	78	MALE	G2	Stage I	T1a	MX	NX	C3	C3	low	0	3	0	3	-1.3027	0.04	6	2901.1	-199.598	-955.297	0.226588	23	67	NA	0.923379	0.828836	2.3145	65	0.220449	5	5	42	0.0020093	0	0	0	0	0	0.0670548	0.356532	0	0.0378304	0.0460006	0.00612674	0	0.154649	0.0206865
TCGA-A3-A8CQ-01A-11R-A37O-07	TCGA-A3-A8CQ-01A	TCGA-A3-A8CQ	59	FEMALE	G2	Stage I	T1a	MX	NX	C3	C3	low	0	3	0	3	-1.3092	0	5	2728.35	-261.432	-1249.5	0.102306	13	7	NA	1	0.798239	0.71289	49	0.208464	5	5	22	0	0.00400564	0	0.049424	0	0	0.0337127	0.398923	0	0.107645	0.0538835	0	0.0267884	0.0450248	0.0132025
TCGA-A3-A8OU-01A-11R-A37O-07	TCGA-A3-A8OU-01A	TCGA-A3-A8OU	74	FEMALE	G1	Stage I	T1a	MX	NX	C3	C3	low	0	0	0	0	-1.279	0.1	0	2524.14	154.876	-1487.37	0.237803	37	12	0.798222	1	NA	1.60875	58	0.0225106	4	4	11	0.00668797	0	0	0	0	0	0.0539847	0.351237	0	0.0233252	0.0997985	0.00624242	0	0.0573308	0.110095
TCGA-A3-A8OV-01A-11R-A37O-07	TCGA-A3-A8OV-01A	TCGA-A3-A8OV	75	MALE	G2	Stage I	T1a	MX	NX	C3	C3	low	0	340	0	340	-1.6903	0	3	3105.55	-650.184	-1959.83	0.0879217	45	16	NA	1	1.39363	2.916	45	0.113516	5	5	18	0.00231395	0	0	0	0	0	0.046235	0.379044	0	0.0301267	0.274125	0	0.0273459	0.0928654	0
TCGA-A3-A8OW-01A-11R-A37O-07	TCGA-A3-A8OW-01A	TCGA-A3-A8OW	37	MALE	G2	Stage III	T3a	MX	NX	C3	C3	low	0	323	0	323	-1.5626	0	1	2104.35	-144.036	-921.908	0.128764	22	11	NA	0.757827	1.05335	0.720067	65	0.058973	4	4	12	0	0.0017979	0	0	0	0	0.0277912	0.216374	0	0.0448548	0.0223923	0.00672457	0.0683254	0	0.0705839
TCGA-A3-A8OX-01A-11R-A37O-07	TCGA-A3-A8OX-01A	TCGA-A3-A8OX	65	FEMALE	G3	Stage I	T1a	MX	NX	C3	C3	low	0	0	0	0	-0.9658	0	0	2916.09	503.455	-712.364	0.42302	26	NA	0.601048	0.933158	NA	0.868948	53	0.000191754	0	0	8	0	0.0422988	0	0.0105961	0	0	0.0984467	0.238274	0	0.0349605	0.0418904	0	0.0368579	0	0.0229254
TCGA-AK-3428-01A-02R-1277-07	TCGA-AK-3428-01A	TCGA-AK-3428	62	MALE	G2	Stage III	T3b	M0	N0	C3	C3	low	0	3728	0	3728	-1.5454	NA	0	2331.12	-289.351	-731.043	0.113818	NA	NA	NA	NA	1.81258	NA	49	0.0727291	2	2	4	0	0.0410198	0.116071	0	0.000278547	0	0.014999	0.197596	0	0.0178685	0.375479	0.03388	0.0314086	0	0.00948967
TCGA-AK-3429-01A-02R-1325-07	TCGA-AK-3429-01A	TCGA-AK-3429	54	FEMALE	G2	Stage II	T2	M0	N0	C3	C3	low	0	3328	0	3328	-1.1286	NA	NA	2023.73	709.846	-1026.69	0.31654	14	3	NA	0.687775	0.853324	0.647545	55	0.400956	NA	NA	NA	0.00327077	0	0	0.0189788	0	0	0.0961733	0.108311	0.00328123	0.00947481	0.0296602	0	0.0836871	0	0.00399156
TCGA-AK-3434-01A-02R-1277-07	TCGA-AK-3434-01A	TCGA-AK-3434	72	MALE	G2	Stage I	T1b	M0	NX	C3	C3	low	0	2087	1	1640	-1.2312	NA	6	1526.86	332.656	-1118.44	0.130479	NA	NA	NA	0.828269	1.54612	NA	69	0.174328	4	4	4	0	0.0166212	0.00114203	0	0	0	0.116831	0.224143	0	0.0174987	0.0117716	0	0.036094	0	0.0179075
TCGA-AK-3450-01A-02R-1277-07	TCGA-AK-3450-01A	TCGA-AK-3450	85	FEMALE	G2	Stage I	T1a	M0	N0	C3	C3	low	0	1779	0	1779	-1.9061	NA	2	3446.54	392.519	-1521.67	0.164161	NA	NA	0.850695	0.972983	1.76745	NA	68	0.201121	9	9	7	0	0.0337017	0.00653419	0	0	0	0.0698772	0.17362	0	0.0810947	0.128309	0	0.0339461	0	0.114568
TCGA-AK-3453-01A-02R-1277-07	TCGA-AK-3453-01A	TCGA-AK-3453	58	FEMALE	G2	Stage II	T2	M0	NX	C3	C4	low	0	2531	0	2531	-2.165	NA	26	2204.6	-1992.88	-1148.85	0.0156638	6	2	NA	NA	0.770295	0.360673	45	0.927548	0	0	2	0	0.033467	0	0.00605315	0	0	0.0317035	0.293568	0	0.0947851	0.0569613	0.000601368	0.02226	0	0.0345385
TCGA-AK-3460-01A-02R-1277-07	TCGA-AK-3460-01A	TCGA-AK-3460	58	MALE	G2	Stage I	T1a	M0	NX	C3	C3	low	0	2508	0	2508	-1.2612	NA	4	1774.37	-53.7522	-851.873	0.126592	NA	NA	NA	0.952434	1.45982	NA	61	0.129101	0	0	19	0.00105403	0.0109056	0.0113003	0	0	0	0.00840532	0.472452	0	0.0440157	0.037895	0.00374155	0	0.00815627	0.00242069
TCGA-AK-3461-01A-02R-1277-07	TCGA-AK-3461-01A	TCGA-AK-3461	72	MALE	G2	Stage I	T1a	M0	NX	C3	C3	low	0	2217	0	2217	-1.3072	NA	NA	612.035	528.448	-833.37	0.160176	NA	NA	NA	0.902317	1.48574	NA	57	0.178908	NA	NA	NA	0.00201315	0.0191363	0	0.0118569	0	0	0.0787193	0.144158	0	0.0429205	0.289777	0	0.0192308	0.0684147	0
TCGA-AS-3778-01A-01R-A32Z-07	TCGA-AS-3778-01A	TCGA-AS-3778	35	MALE	G1	Stage I	T1a	M0	NX	C3	C3	low	0	43	0	43	-1.1627	0	1	3591	143.285	-1223	0.116844	18	88	NA	1	1.28012	1.38346	64	0.0283482	2	2	4	0	0	0	0	0	0	0.078054	0.393727	0	0.046858	0.0825168	0.00255324	0.0103622	0.0401256	0.0525754
TCGA-B0-4693-01A-01R-1277-07	TCGA-B0-4693-01A	TCGA-B0-4693	72	FEMALE	G4	Stage III	T3a	M0	N0	C3	C3	low	1	77	0	77	-1.6371	NA	3	2100.63	1029.66	-1275.68	0.310872	NA	NA	0.774429	0.968767	1.64946	NA	67	0.103845	3	3	3	0	0.0313749	0	0	0	0	0.0598279	0.222945	0.00894443	0	0.0903438	0.00234326	0.0493367	0	0.0447249
TCGA-B0-4710-01A-01R-1503-07	TCGA-B0-4710-01A	TCGA-B0-4710	75	FEMALE	G3	Stage III	T3a	M0	N0	C3	C3	low	0	1755	0	1755	-0.6167	0	19	2799.13	214.36	-771.454	0.16118	29	40	0.82897	0.974949	1.48296	1.85924	59	0.518025	5	5	14	0.00395	0.0388236	0	0	0	0.00385814	0.0260601	0.224545	0.000263944	0.0231324	0.119201	0	0.0131563	0.0655296	0.0784708
TCGA-B0-4714-01A-01R-1277-07	TCGA-B0-4714-01A	TCGA-B0-4714	81	MALE	G3	Stage IV	T3b	M1	NX	C3	C3	low	1	99	1	99	-1.1022	NA	3	2368.62	546.897	-1278.24	0.221153	NA	NA	NA	0.794666	1.40647	NA	75	0.126539	5	5	4	0.00514743	0	0	0	0	0	0.101674	0.184244	0	0.00467929	0.0399073	0	0.0782942	0	0.00579964
TCGA-B0-4718-01A-01R-1277-07	TCGA-B0-4718-01A	TCGA-B0-4718	57	MALE	G2	Stage III	T3a	M0	NX	C3	C3	low	0	1778	1	768	-1.4235	NA	2	2733.7	550.536	-1320.61	0.112241	NA	NA	NA	0.800053	1.97207	NA	123	0.138414	10	10	9	0	0.0115133	0	0	0	0	0.0717276	0.249456	0	0.0482648	0.00793269	0.000642902	0.0401648	0	0.0673133
TCGA-B0-4814-01A-01R-1277-07	TCGA-B0-4814-01A	TCGA-B0-4814	58	MALE	G3	Stage IV	T4	M1	N0	C3	C3	low	1	168	1	168	-0.9344	NA	4	3225.92	-401.017	-1034.72	0.150765	NA	NA	0.841226	0.968794	1.70859	NA	80	0.199572	5	5	5	0.0545294	0.00820157	0.00434637	0	0.00205134	0	0.0768508	0.211748	0	0.0700042	0.0753144	0.0104068	0	0.0211728	0.0387955
TCGA-B0-4816-01A-01R-1503-07	TCGA-B0-4816-01A	TCGA-B0-4816	49	MALE	G3	Stage II	T2	M0	N0	C3	C3	low	1	1371	1	1371	-1.3193	0	2	318.984	-82.3957	-1213.33	0.376741	31	114	NA	0.95775	1.39242	1.5287	68	0.0376206	6	6	7	0	0.00633469	0.00273693	0	0	0	0.0281495	0.345121	0	0.0141966	0.240774	0.0038939	0.0114455	0.0411075	0.00323762
TCGA-B0-4818-01A-01R-1503-07	TCGA-B0-4818-01A	TCGA-B0-4818	68	FEMALE	G3	Stage II	T2	M0	NX	C3	C3	low	1	510	1	127	-1.5932	0	1	2278.47	182.27	-1491.98	0.295685	23	66	0.765621	0.985573	1.24969	1.77601	72	0.0415888	4	4	2	0	0.138465	0.00167905	0	0	0	0.0582421	0.112137	0.00117511	0.00303724	0.05752	0.00402536	0.0240257	0.00309684	0.316689
TCGA-B0-4823-01A-02R-1420-07	TCGA-B0-4823-01A	TCGA-B0-4823	88	MALE	G2	Stage I	T1a	M0	N0	C3	C3	low	1	454	0	454	-1.2609	NA	6	1590.65	725.08	-440.427	0.217147	29	39	0.932628	0.945744	1.50587	2.47681	45	0.174656	0	0	19	0	0.113875	0.00503268	0	0	0	0.0353626	0.331543	0.00364971	0.00746162	0.0157083	0	0.00748837	0	0.0268799
TCGA-B0-4824-01A-01R-1277-07	TCGA-B0-4824-01A	TCGA-B0-4824	49	FEMALE	G3	Stage I	T1a	M0	N0	C3	C3	low	1	1657	0	1657	-1.0457	NA	2	2420.15	271.377	-1318.47	0.247426	NA	NA	NA	0.903819	1.53193	NA	107	0.0629443	5	5	8	0.00701533	0	0	0.0109202	0.00823647	0	0.101203	0.181533	0.0213036	0	0.0555197	0	0.0593219	0	0.00647383
TCGA-B0-4827-01A-02R-1420-07	TCGA-B0-4827-01A	TCGA-B0-4827	77	FEMALE	G4	Stage III	T3b	M0	N0	C3	C3	high	1	885	1	668	-0.7096	0	3	3058.07	185.764	-890.77	0.422414	40	96	0.656001	0.964018	2.11966	2.07802	89	0.115664	3	3	17	0	0.048031	0	0	0	0.00249482	0.0356453	0.249906	0	0.00605367	0.0403755	0.0133647	0.038268	0	0.228108
TCGA-B0-4833-01A-01R-1305-07	TCGA-B0-4833-01A	TCGA-B0-4833	82	FEMALE	G2	Stage I	T1b	M0	N0	C3	C3	low	1	2386	1	2386	-1.2026	NA	4	1927.78	727.512	-1388.51	0.229262	NA	NA	NA	0.679192	2.04325	NA	89	0.162129	3	3	3	0	0	0.00121396	0	0	0	0.0539938	0.141102	0	0.0293054	0.0431791	0	0.0700499	0	0.0724725
TCGA-B0-4837-01A-01R-1305-07	TCGA-B0-4837-01A	TCGA-B0-4837	63	MALE	G3	Stage I	T1b	M0	N0	C3	C3	high	1	1378	1	1208	-0.7609	NA	3	2191.41	-78.0331	-243.941	0.185851	NA	NA	NA	0.964705	1.94254	NA	91	0.113047	10	10	11	0	0.00905064	0	0	0	0.317446	0.0144884	0.22668	0	0.0283154	0.0495264	0.000827615	0.0284905	0.014962	0.00957086
TCGA-B0-4839-01A-01R-1305-07	TCGA-B0-4839-01A	TCGA-B0-4839	80	FEMALE	G2	Stage I	T1b	M0	N0	C3	C3	low	1	1639	0	1639	-1.4184	NA	7	1112.85	-189.379	-1575.87	0.156566	NA	NA	0.965304	0.969207	1.07565	NA	92	0.182277	5	5	6	0.00923389	0.00859512	0.00645327	0.00120125	0	0	0.0215715	0.335337	0	0.0624627	0.124949	0	0.0404141	0.0833157	0.000977348
TCGA-B0-4845-01A-01R-1277-07	TCGA-B0-4845-01A	TCGA-B0-4845	70	MALE	G2	Stage IV	T3a	M1	NX	C3	C3	low	1	1986	1	748	-0.8479	NA	13	1922.33	-109.765	-1102.4	0.0650169	NA	NA	NA	0.983471	1.66303	NA	77	0.947679	4	4	3	0	0.0147838	0.00516572	0	0	0.0158724	0.0471944	0.176032	0	0.0514422	0.1363	0.00552924	0	0.0442703	0.0369111
TCGA-B0-4846-01A-01R-1277-07	TCGA-B0-4846-01A	TCGA-B0-4846	52	MALE	G2	Stage IV	T3a	M1	N0	C3	C3	low	1	1200	1	163	-1.304	NA	1	2319.39	579.634	-1157.2	0.243101	NA	NA	NA	0.970844	1.54953	NA	65	0.0271012	1	1	19	0	0.00501133	0	0.0224094	0	0	0.201644	0.136459	0	0.0376539	0.0237619	0	0.0209169	0	0.000519694
TCGA-B0-4847-01A-01R-1277-07	TCGA-B0-4847-01A	TCGA-B0-4847	60	MALE	G3	Stage IV	T3a	M1	NX	C3	C3	low	1	793	0	793	-0.8649	NA	0	1318.19	537.609	-1083.03	0.365177	NA	NA	NA	0.968511	1.96486	NA	61	0.0581082	5	5	3	0	0.028611	0	0	0	0	0.0517775	0.108694	0.0105914	0	0.0546717	0	0.0345466	0	0.0495087
TCGA-B0-4849-01A-01R-1277-07	TCGA-B0-4849-01A	TCGA-B0-4849	51	MALE	G3	Stage III	T3a	M0	NX	C3	C3	low	1	69	1	4	-1.8271	NA	3	918.41	148.339	-1135.12	0.136463	NA	NA	NA	0.993463	0.909878	NA	103	0.110185	9	9	8	0	0.00467707	0	0	0	0	0.0704986	0.273478	0	0.0498887	0.125026	0.00363941	0.00510337	0.034662	0.00557133
TCGA-B0-4852-01A-01R-1503-07	TCGA-B0-4852-01A	TCGA-B0-4852	78	FEMALE	G2	Stage II	T2	M0	N0	C3	C3	low	1	1121	1	860	-0.635	0.11	2	1413.6	160.909	-562.092	0.159788	29	115	0.780458	0.95488	1.89452	2.1205	52	0.200982	7	7	3	0.0320753	0.0049105	0	0.00172613	0	0.0179766	0.0957645	0.223404	0.00437142	0.0299603	0.0688082	0.0073881	0.0268606	0.0292817	0.0430007
TCGA-B0-4945-01A-01R-1420-07	TCGA-B0-4945-01A	TCGA-B0-4945	75	FEMALE	G2	Stage I	T1a	M0	N0	C3	C3	low	1	2145	0	2145	-1.8531	0.07	3	1380.29	891.244	-982.644	0.17863	27	120	NA	0.917417	1.60143	1.0903	81	0.159688	11	11	8	0.00499145	0.00550348	0.00948836	0	0	0	0.100974	0.35876	0	0.0204612	0.0278394	0.00256873	0.0453265	0.00671617	0.0804561
TCGA-B0-5075-01A-01R-1334-07	TCGA-B0-5075-01A	TCGA-B0-5075	77	FEMALE	G2	Stage III	T3a	M0	N0	C3	C3	low	1	637	0	637	-1.0213	NA	5	2952.22	314.923	-1206.16	0.353556	39	40	NA	0.851582	1.60839	2.15274	64	0.162206	3	3	3	0	0.00869981	0	0.00552781	0.00238562	0.0603666	0.00289419	0.548086	0.0504485	0	0.00676679	0	0.0317888	0	0.000468577
TCGA-B0-5077-01A-01R-1334-07	TCGA-B0-5077-01A	TCGA-B0-5077	77	MALE	G3	Stage I	T1a	M0	N0	C3	C3	low	1	1317	0	1317	-0.7189	0	7	2440.73	264.41	-1165.58	0.225932	19	13	NA	0.877595	1.39677	1.22527	90	0.178369	5	5	12	0.0136811	0	0	0	0	0.0996767	0.0377161	0.357186	0	0.0265479	0.00178438	0	0.084582	0	0.0278457
TCGA-B0-5085-01A-01R-1334-07	TCGA-B0-5085-01A	TCGA-B0-5085	76	FEMALE	G3	Stage III	T3a	M0	N0	C3	C3	low	1	770	0	770	-1.6179	NA	0	2969.07	73.0761	-1770.91	0.134616	31	21	NA	0.976687	1.3599	1.79278	75	0.0445944	5	5	4	0.0596202	0	0.0103326	0	0	0	0.0289416	0.30212	0.0429125	0	0.0601091	0	0.124432	0	0.020376
TCGA-B0-5088-01A-01R-1334-07	TCGA-B0-5088-01A	TCGA-B0-5088	53	MALE	G3	Stage I	T1b	M0	N0	C3	C3	low	1	563	0	563	-1.1979	0.01	1	2661.17	563.743	-1176.11	0.327944	22	11	NA	0.960533	1.23886	1.55723	71	0.0420733	5	5	2	0	0.0390821	0	2.34e-05	0	0	0.0145588	0.408655	0.0394693	0	0.0338756	0	0.0479756	0.013059	0.0192269
TCGA-B0-5095-01A-01R-1420-07	TCGA-B0-5095-01A	TCGA-B0-5095	81	MALE	G3	Stage III	T3a	M0	N0	C3	C3	high	1	245	0	245	-0.5949	0.12	5	1986.13	543.818	-93.1227	0.232718	38	206	NA	0.970022	1.39946	1.97664	92	0.227111	9	9	12	0	0.0299365	0	0	0	0	0.0536445	0.289537	0.0175145	0	0.0678311	0.00582686	0.118959	0	0.0176886
TCGA-B0-5099-01A-01R-1420-07	TCGA-B0-5099-01A	TCGA-B0-5099	88	FEMALE	G3	Stage III	T3b	M0	NX	C3	C3	low	1	485	0	485	-1.2887	0.06	2	3270.53	830.118	-964.753	0.0449655	26	32	NA	0.940958	1.08074	1.83589	135	0.257878	16	16	11	0.0811388	0	0	0	0	0.204781	0.044804	0.0799796	0	0.0129053	0.0731838	0	0.0878789	0.0584764	0.115813
TCGA-B0-5102-01A-01R-1420-07	TCGA-B0-5102-01A	TCGA-B0-5102	74	FEMALE	G3	Stage I	T1	M0	NX	C3	C3	low	1	2764	1	2734	-1.6902	0	15	1371.54	-264.755	-1997.1	0.158084	24	6	0.683441	0.892369	2.03478	1.24977	65	0.402358	9	9	5	0	0.0148691	0	0	0	0	0.0908664	0.370059	0	0	0.0281107	0	0.0616255	0	0.0225335
TCGA-B0-5104-01A-01R-1420-07	TCGA-B0-5104-01A	TCGA-B0-5104	90	FEMALE	G2	Stage I	T1	M0	N0	C3	C3	low	1	2752	0	2752	-1.5891	0	1	2188.63	-0.720509	-1284.13	0.227135	21	99	NA	0.991123	1.59495	1.40418	88	0.0550136	4	4	4	0.0355683	0.00026181	0	0	0	0	0.0521403	0.29378	0	0.0288003	0.209557	0.00568697	0.00554916	0.0392981	0.029165
TCGA-B0-5106-01A-01R-1420-07	TCGA-B0-5106-01A	TCGA-B0-5106	64	MALE	G2	Stage I	T1a	M0	N0	C3	C3	low	1	1598	0	1598	-1.8721	0	6	1565.23	153.794	-1246.23	0.287812	32	95	0.950956	0.959735	1.32477	1.96884	77	0.154372	0	0	4	0	0.108112	0.00564967	0	0	0	0.0179592	0.299833	0	0.0394391	0.0723527	0.00759188	0.0470911	0	0.0431884
TCGA-B0-5110-01A-01R-1420-07	TCGA-B0-5110-01A	TCGA-B0-5110	71	FEMALE	G2	Stage I	T1a	M0	N0	C3	C3	low	0	2009	0	2009	-1.6466	0	1	2521.07	556.224	-750.939	0.160132	28	260	NA	0.902133	0.929073	1.43046	60	0.0723824	6	6	4	0	0.0312009	0.00302762	0	0	0	0.0788758	0.347999	0.0515022	0	0.0936682	0	0.0398838	0.0206723	0.00550684
TCGA-B0-5113-01A-01R-1420-07	TCGA-B0-5113-01A	TCGA-B0-5113	69	FEMALE	G2	Stage III	T3a	M0	N0	C3	C3	low	0	1175	0	1175	-1.6153	0.09	23	3200.13	83.0027	-874.12	0.194707	15	19	0.837108	0.974192	1.35359	0.917267	66	0.654542	3	3	5	0.00367129	0.0251597	0	0	0	0	0.0701222	0.334799	0	0.0360989	0.0132927	0.00675043	0.039756	0	0.0350047
TCGA-B0-5115-01A-01R-1420-07	TCGA-B0-5115-01A	TCGA-B0-5115	43	MALE	G3	Stage IV	T2	M1	N0	C3	C3	low	0	1604	1	75	-1.3203	0.11	2	3132.39	86.2284	-707.827	0.119199	12	42	NA	0.986872	0.918666	1.41186	77	0.154101	5	5	19	0	0	0	0.00899241	0	0.0192402	0.0741283	0.308756	0	0.0223594	0.0629149	0	0	0.0726103	0.0437837
TCGA-B0-5119-01A-02R-1420-07	TCGA-B0-5119-01A	TCGA-B0-5119	61	FEMALE	G2	Stage I	T1b	M0	N0	C3	C3	low	0	1552	0	1552	-1.0229	0	2	3061.15	169.927	-988.387	0.124423	15	69	NA	0.784353	0.968022	2.19719	50	0.0652988	5	5	3	0	0	0.00594157	0	0	0	0.033246	0.263149	0.00815496	0.00805507	0.0505304	0.0081815	0.0637906	0	0.000237159
TCGA-B0-5120-01A-01R-1420-07	TCGA-B0-5120-01A	TCGA-B0-5120	72	FEMALE	G2	Stage I	T1a	M0	N0	C3	C3	low	0	1169	0	1169	-1.0619	0	2	3140.76	804.497	-307.818	0.199246	NA	NA	0.506389	1	1.49045	1.4262	53	0.123197	4	4	3	0	0.0628581	0	0.0106183	0	0	0.0350805	0.42547	0.140311	0	0.0241543	0.00275283	0.0574142	0	0.02404
TCGA-B0-5121-01A-02R-1420-07	TCGA-B0-5121-01A	TCGA-B0-5121	56	MALE	G2	Stage I	T1b	M0	N0	C3	C3	low	0	1485	0	1485	-1.2208	0.02	1	1963.67	479.78	-1058.37	0.167823	14	4	NA	0.993504	1.28909	1.03054	74	0.0748062	7	7	5	0.00250838	0	0	0	0	0	0.0608342	0.259667	0	0.0683328	0.0870372	0	0	0.0789039	0.00209171
TCGA-B0-5399-01A-01R-1503-07	TCGA-B0-5399-01A	TCGA-B0-5399	46	MALE	G2	Stage I	T1b	M0	N0	C3	C3	low	0	1411	0	1411	-1.1159	NA	NA	2605.78	-197.915	-871.26	0.259276	10	4	NA	0.972493	1.25277	0.961052	43	0.0723917	NA	NA	NA	0.0204684	0	0	0.0681685	0	0	0.0649619	0.224757	0	0.0444513	0.0279986	0	0.0700486	0	0.0101545
TCGA-B0-5690-01A-11R-1541-07	TCGA-B0-5690-01A	TCGA-B0-5690	53	FEMALE	G1	Stage I	T1b	M0	NX	C3	C3	low	0	3392	0	3392	-1.1424	0.04	1	2192.43	79.4854	-1008.25	0.197526	31	5	NA	0.99374	1.09893	1.48326	61	0.0817889	4	4	2	0	0.0806978	0	0	0	0	0.087918	0.219353	0	0.083487	0.192909	0	0.0480907	0.0459771	0.0196815
TCGA-B0-5692-01A-11R-1541-07	TCGA-B0-5692-01A	TCGA-B0-5692	66	FEMALE	G3	Stage III	T3b	M0	N0	C3	C3	low	0	3944	0	3944	-0.9295	0	2	1951.59	1205.06	-1443.27	0.337267	17	219	0.777515	0.907011	1.9481	1.42344	116	0.101863	4	4	4	0	0.0147591	0	0	0	0	0.0514969	0.101558	0.0049326	0	0.0131633	0.00174157	0.127298	0	0.00760818
TCGA-B0-5693-01A-11R-1541-07	TCGA-B0-5693-01A	TCGA-B0-5693	47	FEMALE	G2	Stage I	T1b	M0	NX	C3	C3	low	0	4074	0	4074	-1.0398	0.02	3	2560.41	-10.0031	-903.274	0.0892307	24	250	NA	1	1.05545	1.0432	57	0.0872561	4	4	19	0	0.0211071	0.000518497	0	0	0	0.0577961	0.355636	0	0.148181	0.0944063	0	0.0603117	0.0547948	0.0303903
TCGA-B0-5694-01A-11R-1541-07	TCGA-B0-5694-01A	TCGA-B0-5694	71	MALE	G3	Stage III	T3a	M0	N0	C3	C3	low	1	480	1	288	-1.5383	0.03	5	2854.42	216.614	-891.113	0.211153	14	19	NA	0.98666	1.4064	1.43394	77	0.192868	3	3	3	0	0.0194808	0	0	0	0.0315515	0.0343389	0.392527	0.00492911	0	0.0759037	0	0.0518068	0.102371	0.0274196
TCGA-B0-5695-01A-11R-1541-07	TCGA-B0-5695-01A	TCGA-B0-5695	61	FEMALE	G2	Stage I	T1b	M0	N0	C3	C3	low	0	2150	0	2150	-1.5962	0.03	1	3121.02	74.1115	-1465.06	0.084808	33	3	NA	0.95275	1.21244	1.73064	63	0.0618667	5	5	4	0	0.069922	0.00432982	0	0	0	0.0195441	0.18209	0.000857594	0.0566627	0.15199	0	0.0161877	0	0.0181779
TCGA-B0-5696-01A-11R-1541-07	TCGA-B0-5696-01A	TCGA-B0-5696	69	MALE	G4	Stage III	T3a	M0	N0	C3	C3	low	0	2609	1	1717	-1.2225	0.24	6	2044.92	292.81	-1226.31	0.131422	28	36	NA	0.988594	1.54413	1.45795	77	0.254795	10	10	4	0	0.00636869	0	0	0	0	0.0690177	0.380087	0	0.0346209	0.121181	0.000903117	0.0341027	0	0.0150903
TCGA-B0-5698-01A-11R-1672-07	TCGA-B0-5698-01A	TCGA-B0-5698	77	MALE	G3	Stage I	T1b	M0	N0	C3	C3	low	0	3631	0	3631	-1.5567	0.03	3	1645.39	475.341	-838.201	0.204293	31	252	NA	0.990078	1.24883	1.90878	33	0.131523	5	5	19	0	0.0298856	0.000464504	0	0	0.00366528	0.0875577	0.266244	0	0.00786584	0.131885	0.00902789	0.0265588	0	0.0300785
TCGA-B0-5699-01A-11R-1541-07	TCGA-B0-5699-01A	TCGA-B0-5699	53	MALE	G2	Stage I	T1	M0	N0	C3	C3	low	0	3841	1	94	-0.8671	0	1	3754.73	26.3924	-1221.7	0.158914	19	NA	NA	0.993963	1.71506	1.02961	93	0.0463045	5	5	11	0.0297995	0	0	0	0	0	0.135386	0.267688	0	0.0569545	0.100725	0.0046499	0.042623	0.0751592	0.00188787
TCGA-B0-5700-01A-11R-1541-07	TCGA-B0-5700-01A	TCGA-B0-5700	77	MALE	G2	Stage I	T1a	M0	N0	C3	C3	low	0	1790	0	1790	-1.3415	NA	NA	2418.22	387.9	-1250.77	0.167217	25	109	NA	0.984338	1.03131	1.66335	NA	NA	NA	NA	NA	0	0.020873	0	0	0	0	0.046625	0.31189	0.101809	0	0.0879785	0	0.074151	0	0.0238879
TCGA-B0-5703-01A-11R-1541-07	TCGA-B0-5703-01A	TCGA-B0-5703	73	MALE	G3	Stage I	T1b	M0	N0	C3	C3	low	0	2246	0	2246	-1.0235	0	5	2613.73	348.995	-1246.82	0.187672	25	93	NA	0.986506	1.41356	1.63351	94	0.188403	14	14	14	0	0.0122339	0	0	0	0.00736329	0.0620117	0.0268894	0	0.0390362	0.0677026	0	0.0943145	0.0717838	0.00553302
TCGA-B0-5705-01A-11R-1541-07	TCGA-B0-5705-01A	TCGA-B0-5705	65	FEMALE	G2	Stage I	T1	M0	N0	C3	C3	low	0	4537	1	842	-1.2871	0	2	3496.57	-564.549	-1301.07	0.214222	35	181	NA	0.913894	1.57657	1.78383	71	0.0939144	3	3	2	0.00432975	0	0	0.0130448	0	0	0.0903027	0.194319	0	0.060902	0.0676927	0	0.0461547	0	0.0278188
TCGA-B0-5706-01A-11R-1541-07	TCGA-B0-5706-01A	TCGA-B0-5706	45	MALE	G2	Stage II	T2	M0	N0	C3	C3	low	0	3205	0	3205	-1.0268	NA	NA	1901.1	1415.28	-890.665	0.439969	24	157	0.713857	0.887604	0.931612	1.28508	69	0.0843704	NA	NA	NA	0	0.147168	0.013335	0	0	0	0.0271062	0.071048	0.0115076	0	0.0255859	0.00908853	0.0322194	0	0.232684
TCGA-B0-5710-01A-11R-1672-07	TCGA-B0-5710-01A	TCGA-B0-5710	57	MALE	G2	Stage I	T1b	M0	N0	C3	C3	low	0	2430	1	1441	-1.3262	0.03	2	1298.22	331.453	-584.077	0.174686	9	16	0.734627	0.986672	1.79321	0.997968	79	0.141807	8	8	5	0	0.0256073	0	0	0	0.0979648	0.0845545	0.26884	0	0.0487033	0.0314607	0	0.0462672	0	0.00454657
TCGA-B0-5711-01A-11R-1672-07	TCGA-B0-5711-01A	TCGA-B0-5711	50	MALE	G3	Stage III	T3b	M0	NX	C3	C3	low	0	3989	1	3766	-1.2744	0.02	1	3220.17	224.893	-572.986	0.233844	12	42	0.911765	0.980034	1.49643	0.847693	55	0.083228	5	5	3	0	0.0227524	0.0015611	0.00118436	0	0	0.0527594	0.234534	0	0.051743	0.127113	0	0	0.0546128	0.016063
TCGA-B0-5712-01A-11R-1672-07	TCGA-B0-5712-01A	TCGA-B0-5712	68	FEMALE	G3	Stage IV	T2	M1	N0	C3	C3	low	0	2722	1	725	-1.2419	0.03	3	2810.38	96.5855	-1320.46	0.197388	48	193	0.964512	0.905158	2.46917	2.62271	119	0.176736	1	1	7	0.0133342	0.000814887	0.00935973	0	0	0	0.0332826	0.235199	0.034708	0	0.0222312	0	0.0838524	0	0.0158781
TCGA-B0-5713-01A-11R-1672-07	TCGA-B0-5713-01A	TCGA-B0-5713	75	FEMALE	G3	Stage III	T3b	M0	N0	C3	C3	low	0	2782	0	2782	-1.1803	0.09	5	2343.9	150.934	-890.308	0.211953	44	220	NA	0.925195	1.07388	2.76739	47	0.162062	5	5	3	0	0.0127277	0	0	0	0	0.187823	0.187999	0	0.0365814	0.124447	0	0.0946438	0	0.020911
TCGA-B0-5812-01A-11R-1672-07	TCGA-B0-5812-01A	TCGA-B0-5812	53	MALE	G3	Stage I	T1b	M0	NX	C3	C3	low	0	3834	0	3834	-1.1283	0.01	0	1838.78	372.53	-489.451	0.222569	19	102	NA	0.971117	1.14739	1.11519	89	0.0475297	5	5	3	0	0.0347453	0	0.0104763	0	0	0.0670925	0.193268	0	0.0747641	0.124757	0	0.043641	0	0.0147465
TCGA-B2-3924-01A-02R-1325-07	TCGA-B2-3924-01A	TCGA-B2-3924	73	MALE	G2	Stage I	T1b	M0	NX	C3	C3	low	0	1092	0	1092	-0.8537	0.19	5	2256.23	564.41	-879.315	0.265194	NA	NA	0.794624	0.824244	1.02626	0	45	0.183408	1	1	7	0	0.0207691	0	0	0	0	0.0856725	0.195841	0.00924817	0	0.0351386	0.00264327	0.0712162	0	0.00720576
TCGA-B2-4101-01A-02R-1277-07	TCGA-B2-4101-01A	TCGA-B2-4101	52	MALE	G3	Stage II	T2a	M0	NX	C3	C3	low	0	648	0	648	-1.3241	NA	0	2712.5	187.338	-745.784	0.295856	18	61	0.83866	0.979217	1.77745	1.22862	77	0.0492024	5	5	19	0	0.0150802	0	0.0220965	0	0	0.0716053	0.192076	0	0.0365031	0.116851	0	0.0141026	0.0791286	0.0355795
TCGA-B2-4102-01A-02R-1325-07	TCGA-B2-4102-01A	TCGA-B2-4102	61	MALE	G2	Stage I	T1b	M0	NX	C3	C3	low	0	952	0	952	-1.4223	0.03	0	3783.75	314.591	-831.466	0.293632	25	103	0.917148	0.983132	1.71702	1.40543	121	0.081844	4	4	2	0	0.0203542	0.00418424	0	0	0	0.0915044	0.283422	0	0.0663158	0.143969	0.026668	0.0126986	0.0392635	0.0277514
TCGA-B2-5633-01A-01R-1541-07	TCGA-B2-5633-01A	TCGA-B2-5633	56	MALE	G2	Stage I	T1b	M0	N0	C3	C3	low	0	963	0	963	-1.3095	0.02	6	2876.11	383.215	-448.184	0.38146	24	10	0.405726	0.983836	1.62957	0.958593	62	0.230712	6	6	20	0.00311086	0.0167009	0.0031223	0.00703196	0	0	0.040963	0.389567	0	0.0571025	0.0473304	0	0	0.046217	0
TCGA-B2-5635-01A-01R-1541-07	TCGA-B2-5635-01A	TCGA-B2-5635	74	MALE	G2	Stage I	T1a	M0	NX	C3	C3	low	0	755	0	755	-1.4737	0	2	3180.45	-185.861	-991.721	0.383648	19	26	NA	0.955321	1.39061	1.26941	45	0.0913903	0	0	26	0	0	0.0109062	0	0	0	0.0549819	0.2667	0	0.0276529	0.0960291	0.00351263	0.0594319	0	0.00815117
TCGA-B2-5636-01A-02R-1541-07	TCGA-B2-5636-01A	TCGA-B2-5636	79	MALE	G2	Stage I	T1a	M0	NX	C3	C3	low	0	919	0	919	-1.8712	NA	NA	2979.72	33.5437	-492.457	0.0805324	11	NA	0.807944	0.984859	0.899309	0.363932	NA	NA	NA	NA	NA	0	0.0654609	0	0	0	0	0.0277543	0.352161	0	0.186354	0.0798798	0.019138	0.0603056	0	0.0200052
TCGA-B2-5641-01A-01R-1541-07	TCGA-B2-5641-01A	TCGA-B2-5641	79	MALE	G3	Stage I	T1a	M0	N0	C3	C3	low	0	656	0	656	-0.9943	0.19	3	3316.31	688.239	-987.069	0.444824	33	92	NA	0.762494	1.39803	1.6181	91	0.161203	11	11	11	0	0.035063	0	0.00124918	0	0	0.0416866	0.257464	0	0.0130551	0.0233308	0.00793341	0.0759846	0	0.00456183
TCGA-B2-A4SR-01A-11R-A266-07	TCGA-B2-A4SR-01A	TCGA-B2-A4SR	61	MALE	NA	Stage II	T2a	M0	NX	C3	C3	low	0	507	1	266	-1.2178	0	2	2572.61	288.919	-1103.74	0.121078	17	144	NA	0.99388	1.1034	1.01596	81	0.0645454	9	9	33	0.00137926	0.00114933	0	0.0201336	0	0.00789502	0.0894182	0.334431	0	0.0762673	0.0323634	0	0.0382486	0.00623354	0.0203767
TCGA-B4-5377-01A-01R-1503-07	TCGA-B4-5377-01A	TCGA-B4-5377	68	FEMALE	G3	Stage IV	T3	M1	N0	C3	C3	low	0	365	0	365	-1.3871	0	4	2751.57	-4.84367	-1254.1	0.17529	18	34	NA	0.881256	1.11073	1.29825	35	0.105286	3	3	4	0	0.0304413	0	0	0	0	0.0817508	0.290444	0.0199769	0	0.102015	0	0	0.0138491	0
TCGA-B4-5378-01A-01R-1503-07	TCGA-B4-5378-01A	TCGA-B4-5378	62	MALE	G2	Stage I	T1	M0	N0	C3	C4	low	0	175	0	175	-1.4479	0	0	3514.12	-56.3884	-855.958	0.0408376	NA	NA	NA	1	1.08316	0	39	4.96e-06	0	0	0	0	0.0902607	0	0	0	0	0.0104862	0.322803	0.0811916	0.108348	0.0538568	0.0230749	0.0617714	0.053023	0.015874
TCGA-B4-5834-01A-11R-1672-07	TCGA-B4-5834-01A	TCGA-B4-5834	59	MALE	G1	Stage I	T1	M0	N0	C3	C3	low	0	38	0	38	-1.3084	0	3	2690.01	359.763	-750.194	0.117645	15	18	NA	0.995825	0.86612	0.644251	61	0.084026	4	4	2	0	0.0222976	0	0.0019262	0.000690163	0	0.107362	0.260946	0	0.087991	0.12666	0	0.0413111	0	0.00618788
TCGA-B4-5838-01A-11R-1672-07	TCGA-B4-5838-01A	TCGA-B4-5838	52	MALE	G2	NA	T3	M0	N1	C3	C3	low	0	166	0	166	-0.485	0.04	21	1511.02	-571.628	-253.984	0.223708	29	191	NA	0.965765	1.49905	1.66196	44	0.48584	6	6	2	0	0.0650906	0	0.00246968	0	0.0265384	0.113451	0.288597	0	0.0379153	0.055144	0	0	0	0.01709
TCGA-B4-5843-01A-11R-1672-07	TCGA-B4-5843-01A	TCGA-B4-5843	45	MALE	G2	Stage I	T1	M0	N0	C3	C3	low	0	11	0	11	-0.6892	0	6	3293.73	-84.9239	-374.116	0.0980354	16	4	NA	1	1.70295	1.17262	55	0.238425	3	3	4	0.00260937	0.0146825	0	0	0	0	0.0444081	0.605536	0	0.0620886	0.0272	0.00466254	0.0167962	0.0269582	0.00704849
TCGA-B4-5844-01A-11R-1672-07	TCGA-B4-5844-01A	TCGA-B4-5844	61	FEMALE	G1	Stage II	T2	M0	N0	C3	C3	low	0	7	0	7	-1.3816	0	1	2290.68	263.001	-978.489	0.138817	35	28	NA	0.97957	1.22791	1.78975	37	0.0316461	5	5	2	0	0.0290875	0.0111033	0	0	0.0184048	0.0430924	0.240135	0	0.0832297	0.289035	0	0.0138665	0.0779256	0.0216892
TCGA-B8-4148-01A-02R-1325-07	TCGA-B8-4148-01A	TCGA-B8-4148	63	FEMALE	G3	Stage I	T1a	M0	N0	C3	C3	low	0	1520	0	1520	-0.9366	0.01	2	2351.18	248.635	-1092.88	0.249178	17	91	0.830481	0.658412	1.20831	0.779819	66	0.0821953	5	5	4	0.00944822	0	0	0	0	0	0.0923413	0.166692	0.00433222	0	0.0420707	0	0.123675	0	0.0245932
TCGA-B8-4151-01A-01R-1188-07	TCGA-B8-4151-01A	TCGA-B8-4151	51	FEMALE	G2	Stage III	T3a	M0	N0	C3	C4	low	0	1299	0	1299	-1.7306	0	1	2605.64	-80	-1580.69	0.0560332	19	73	NA	1	0.984093	1.39222	85	0.0320799	5	5	2	0.0154846	0.000381033	0.051202	0	0	0	0.0645709	0.457643	0	0.0705702	0.06378	0.0156224	0.0276498	0	0.00229433
TCGA-B8-4153-01B-11R-1672-07	TCGA-B8-4153-01B	TCGA-B8-4153	74	MALE	G3	Stage III	T3a	M0	NX	C3	C3	low	0	762	1	223	-1.654	0	0	2318.94	1005.15	-1522.58	0.119215	28	96	NA	0.983727	1.44417	1.67261	60	0.0188686	3	3	5	0	0.00391456	0	0	0	0	0.0346647	0.34748	0	0.0250885	0.0921244	0	0.0206016	0.0597764	0
TCGA-B8-5159-01A-01R-1420-07	TCGA-B8-5159-01A	TCGA-B8-5159	61	FEMALE	G3	Stage I	T1a	M0	N0	C3	C3	low	0	722	0	722	-1.0993	NA	5	3559.51	56.9789	-956.013	0.153873	18	31	NA	0.825271	1.7177	1.39788	79	0.239329	6	6	3	0	0.011008	0	0	0	0	0.0750534	0.231517	0	0.0228634	0.0708038	0.0168053	0.0611816	0	0.00792329
TCGA-B8-5164-01A-01R-1420-07	TCGA-B8-5164-01A	TCGA-B8-5164	65	MALE	G3	Stage III	T3a	M0	N0	C3	C3	low	0	26	0	26	-0.9156	0	3	2834.99	984.531	-1066.51	0.474904	27	45	NA	0.85497	1.59428	2.145	75	0.129656	5	5	11	0.0182267	0	0	0.0157881	0	0	0.0686936	0.18527	0	0.0266247	0.0188314	0	0.0663652	0	0
TCGA-B8-5165-01A-01R-1420-07	TCGA-B8-5165-01A	TCGA-B8-5165	43	MALE	G2	Stage I	T1a	M0	N0	C3	C3	low	0	737	0	737	-1.4337	0.03	0	2520.63	317.564	-373.108	0.125315	5	2	0.789519	0.963956	1.58752	0.498946	40	0.0688098	3	3	2	0	0.14943	0	0	0	0.0199953	0.0471753	0.27838	0	0.0695805	0.0261224	0.00369336	0.0372359	0	0.034525
TCGA-B8-5549-01A-01R-1541-07	TCGA-B8-5549-01A	TCGA-B8-5549	53	MALE	G3	Stage I	T1b	M0	N0	C3	C3	low	0	194	0	194	-1.171	0.02	22	2891.65	676.466	-994.352	0.193104	18	10	NA	0.932685	0.960743	1.43399	91	0.755246	5	5	6	0	0.0107512	0.00704192	0	0	0	0.0381532	0.254428	0.0275668	0	0.0648491	0.0176552	0.0103237	0	0.0143948
TCGA-B8-5550-01A-01R-1541-07	TCGA-B8-5550-01A	TCGA-B8-5550	71	MALE	G3	Stage III	T3a	M0	N0	C3	C3	low	0	1476	1	694	-0.6703	0	10	1652.35	-543.298	-384.18	0.292923	49	129	NA	0.974075	1.71798	2.78464	97	0.336871	6	6	16	0	0.0122822	0	0.00146028	0	0.00303752	0.0588698	0.4708	0	0.0427191	0.0151826	0.0382475	0.0193253	0	0.00194314
TCGA-B8-5552-01B-11R-1672-07	TCGA-B8-5552-01B	TCGA-B8-5552	41	FEMALE	G2	Stage I	T1b	M0	NX	C3	C3	low	0	1046	0	1046	-1.2196	0	1	2609.27	771.078	-254.124	0.294359	14	NA	NA	0.952028	1.17048	0.721798	51	0.05712	3	3	2	0	0.060107	0	0.00968054	0	0.0505697	0.0252531	0.499301	0.0240039	0.0152987	0.0186242	0.00386302	0.0220403	0	0.00528569
TCGA-B8-5553-01A-01R-1541-07	TCGA-B8-5553-01A	TCGA-B8-5553	67	FEMALE	G2	Stage I	T1b	M0	N0	C3	C3	low	0	435	0	435	-1.4201	0	0	2222.11	426.785	-668.047	0.329069	10	1	0.95602	0.957429	1.72632	1.52377	59	0.0910294	5	5	6	0	0.0894605	0	0.00929807	0.00223729	0	0.122348	0.205466	0.033544	0	0.0440389	0.00256947	0.0319636	0	0.0258607
TCGA-B8-A54D-01A-21R-A266-07	TCGA-B8-A54D-01A	TCGA-B8-A54D	69	MALE	G2	Stage III	T3a	MX	NX	C3	C3	low	0	830	0	830	-0.843	0	1	955.886	608.107	-707.498	0.337068	21	27	NA	0.866885	1.28591	1.24463	86	0.11875	8	8	33	0.000417231	0	0	0	0	0	0.0312894	0.279787	0	0	0.0117114	0.00458162	0.0748236	0	0.0398629
TCGA-B8-A54F-01A-11R-A266-07	TCGA-B8-A54F-01A	TCGA-B8-A54F	49	FEMALE	G2	Stage I	T1a	MX	NX	C3	C3	low	0	519	0	519	-1.4986	0	3	2675.2	-83.9335	-1053.86	0.21192	11	46	NA	1	1.39797	0.793804	79	0.116435	5	5	23	0	0.0534694	0.00733707	0	0	0	0.000507435	0.536815	0	0.00653859	0.0671761	0.000656741	0	0.0354989	0.0438623
TCGA-B8-A54G-01A-11R-A266-07	TCGA-B8-A54G-01A	TCGA-B8-A54G	50	MALE	G3	Stage I	T1a	MX	NX	C3	C3	low	0	53	0	53	-0.5903	0	1	1403.34	741.741	-1158.14	0.412164	18	1	NA	0.406403	1.65878	0.959497	84	0.142693	14	14	41	0.0124611	0	0	0.014133	0	0	0.0373626	0.291999	0.00245039	0	0.0523603	0.00120292	0.0606125	0	0.0116514
TCGA-B8-A54H-01A-11R-A33J-07	TCGA-B8-A54H-01A	TCGA-B8-A54H	69	FEMALE	G3	Stage II	T2a	MX	N0	C3	C3	low	0	256	0	256	-1.8399	0.09	1	-294.79	124.563	-1462.58	0.250558	41	452	NA	0.648814	0.989509	1.8235	77	0.0712171	4	4	28	0.0104485	0	0	0	0	0	0.0255553	0.216568	0	0.009403	0.0478672	0.00101073	0.0550869	0.00750408	0.0360028
TCGA-B8-A54J-01A-11R-A33J-07	TCGA-B8-A54J-01A	TCGA-B8-A54J	60	MALE	G2	Stage II	T2a	MX	NX	C3	C3	low	0	528	0	528	-1.3971	0.05	1	1024.64	328.697	-1101.03	0.231832	29	107	NA	0.952521	1.00106	1.38161	73	0.0655691	3	3	14	0	0	0.000765902	0	0	0	0.0754185	0.199966	0	0.0238607	0.0874451	0	0.048394	0	0.0470266
TCGA-BP-4158-01A-02R-1289-07	TCGA-BP-4158-01A	TCGA-BP-4158	69	MALE	G2	Stage I	T1b	M0	N0	C3	C3	low	0	3377	0	3377	-1.1604	NA	6	2530.8	-124.296	-1044.58	0.121613	NA	NA	NA	0.988594	1.1752	NA	67	0.183676	0	0	2	0.00205407	0	0	0	0	0	0.0757609	0.352267	0	0.080909	0.0264131	0	0.0124234	0.10411	0.0393556
TCGA-BP-4159-01A-02R-1289-07	TCGA-BP-4159-01A	TCGA-BP-4159	70	MALE	G2	Stage I	T1b	M0	N0	C3	C6	low	1	2601	1	2352	-1.1852	NA	3	1210.81	328.847	-756.181	0.14713	NA	NA	NA	0.988109	1.51236	NA	88	0.113577	7	7	3	0.0161455	0	0.000888784	0	0	0	0.0448327	0.359605	0	0.0482146	0.101103	0	0.0319465	0.109991	0.00975893
TCGA-BP-4160-01A-02R-1289-07	TCGA-BP-4160-01A	TCGA-BP-4160	67	MALE	G2	Stage III	T3a	M0	N0	C3	C3	low	0	2881	0	2881	-1.0581	NA	3	2230.48	1387.29	-461.045	0.424268	NA	NA	0.896014	0.884718	1.45699	NA	107	0.101119	4	4	5	0	0.0111734	0	0.00712711	0	0	0.0557366	0.182517	0.00863092	0	0.0190699	0	0.0887424	0	0.00570918
TCGA-BP-4162-01A-02R-1325-07	TCGA-BP-4162-01A	TCGA-BP-4162	65	FEMALE	G2	Stage I	T1b	M0	N0	C3	C3	low	0	3074	0	3074	-1.0534	0	10	2184.36	1186.92	-1056.82	0.325159	19	71	NA	0.800624	1.30641	0.827125	78	0.434279	5	5	2	0	0.00437677	0	0.00555908	0	0.0109756	0.0622967	0.24713	0.00971372	0	0.0111118	0.00758439	0.133421	0	0.0204882
TCGA-BP-4164-01A-02R-1325-07	TCGA-BP-4164-01A	TCGA-BP-4164	51	FEMALE	G2	Stage III	T3a	M0	NX	C3	C3	low	1	992	0	992	-1.3283	0	13	2476.65	-34.6869	-1336.26	0.0976364	19	NA	NA	0.964184	0.773249	0.936285	78	0.947669	4	4	7	0.0412432	0.00263455	0.0177654	0	0	0	0.0519958	0.305791	0	0.0272302	0.0691538	0.00717282	0.0717093	0	0.0129482
TCGA-BP-4165-01A-02R-1289-07	TCGA-BP-4165-01A	TCGA-BP-4165	64	FEMALE	G1	Stage I	T1b	M0	N0	C3	C3	low	0	3037	1	1049	-1.5163	NA	1	2292.26	171.036	-1513.68	0.134033	NA	NA	NA	0.935408	1.25055	NA	77	0.0212379	3	3	3	0	0.0102258	0	0	0	0	0.0595512	0.152398	0	0.0499621	0.0593158	0	0.0627213	0.147698	0.0250305
TCGA-BP-4166-01A-02R-1289-07	TCGA-BP-4166-01A	TCGA-BP-4166	69	MALE	G3	Stage III	T3a	M0	N0	C3	C3	low	0	13	0	13	-1.0997	NA	22	1264.58	311.858	-742.433	0.183103	NA	NA	0.972032	0.986996	1.22231	NA	56	0.593307	7	7	8	0	0.0826962	0	0	0	0	0.0552799	0.370623	0	0.0461509	0.024399	0	0.0337605	0.00303961	0.0423633
TCGA-BP-4170-01A-02R-1289-07	TCGA-BP-4170-01A	TCGA-BP-4170	72	FEMALE	G2	Stage I	T1b	M0	N0	C3	C3	low	1	2343	0	2343	-1.4063	NA	3	2758.19	233.413	-1251.06	0.218715	NA	NA	0.950578	0.92428	1.18208	NA	79	0.118975	5	5	4	0	0.0110035	0	0.000434623	0	0	0.0939878	0.269651	0.0391611	0	0.0272739	0.0182171	0.0553356	0	0.00454891
TCGA-BP-4173-01A-02R-1289-07	TCGA-BP-4173-01A	TCGA-BP-4173	47	MALE	G3	Stage II	T2	M0	N0	C3	C3	low	0	1893	0	1893	-0.4936	NA	NA	847.001	1427.09	-272.275	0.599701	NA	NA	0.99693	0.801882	1.61017	NA	55	0.103631	NA	NA	NA	0	0.00346743	0	0.000831341	0	0	0.0730674	0.160736	0.0236772	0	0.0571093	0.00760692	0.0612924	0	0.00708163
TCGA-BP-4174-01A-02R-1289-07	TCGA-BP-4174-01A	TCGA-BP-4174	49	MALE	G3	Stage II	T2	M0	N0	C3	C3	low	0	1879	0	1879	-0.9353	NA	14	1979.04	-757.629	-1136.83	0.206137	NA	NA	NA	0.977594	1.724	NA	84	0.947102	7	7	5	0	0.00365358	0	0	0	0.000623401	0.0438263	0.430548	0.00153106	0.00652197	0.132125	0.00608437	0	0	0.00346125
TCGA-BP-4325-01A-02R-1289-07	TCGA-BP-4325-01A	TCGA-BP-4325	64	FEMALE	G2	Stage I	T1b	M0	N0	C3	C3	low	0	2964	0	2964	-0.6856	NA	4	3027.18	-471.209	-1361.96	0.159284	NA	NA	NA	0.820247	1.2981	NA	73	0.130922	4	4	4	0	0.000127048	0	0	0	0	0.0502012	0.251091	0.0085754	0	0.0357664	0.00342438	0.0723809	0	0.0296323
TCGA-BP-4327-01A-01R-1289-07	TCGA-BP-4327-01A	TCGA-BP-4327	75	FEMALE	G2	Stage II	T2	M0	N0	C3	C3	low	1	109	0	109	-1.5557	NA	4	2591.33	350.426	-1771.94	0.113322	NA	NA	0.829585	0.979798	1.21368	NA	73	0.291778	4	4	6	0	0.00131339	0	0	0	0.0130423	0.0384495	0.318189	0	0.02045	0.0276291	0.00511076	0.0452734	0.0571644	0.122848
TCGA-BP-4329-01A-02R-1289-07	TCGA-BP-4329-01A	TCGA-BP-4329	75	MALE	G2	Stage III	T3a	M0	N0	C3	C3	low	1	845	1	134	-1.6553	NA	2	3161.85	262.047	-873.751	0.159654	NA	NA	NA	0.98346	1.91173	NA	99	0.134866	8	8	6	0.00603198	0.00956125	0.00123672	0.0120169	0	0	0.0488076	0.255489	0	0.102177	0.118576	0	0.0277633	0	0.00190513
TCGA-BP-4330-01A-01R-1289-07	TCGA-BP-4330-01A	TCGA-BP-4330	60	FEMALE	G2	Stage III	T3a	M0	N0	C3	C3	low	0	1888	0	1888	-1.1803	NA	0	4043.96	455.446	-700.924	0.310242	NA	NA	0.90353	0.946475	1.35965	NA	85	0.0513121	5	5	19	0	0.0593218	0	0	0	0	0.0785535	0.158106	0	0.0284943	0.031332	0	0.0551636	0	0.0915198
TCGA-BP-4332-01A-01R-1289-07	TCGA-BP-4332-01A	TCGA-BP-4332	36	MALE	G2	Stage III	T3a	M0	N0	C3	C3	low	0	1133	0	1133	-1.2105	NA	3	2508.57	158.674	-811.256	0.0933671	NA	NA	NA	0.97748	1.51791	NA	115	0.13519	5	5	18	0.00754236	0.012719	0	0	0	0	0.0075602	0.548761	0	0.0346154	0.103167	0	0.0135129	0.0329356	0
TCGA-BP-4335-01A-01R-1289-07	TCGA-BP-4335-01A	TCGA-BP-4335	65	FEMALE	G3	Stage IV	T3a	M1	N0	C3	C3	low	1	475	1	160	-1.2664	NA	2	1504.03	1105.95	-1073.59	0.230796	NA	NA	0.840265	0.978081	1.93267	NA	59	0.100313	5	5	3	0	0.141802	0	0	0.00663528	0	0.0823186	0.0702606	0.0304671	0	0.0127199	0.00480243	0.041328	0	0.171913
TCGA-BP-4337-01A-01R-1289-07	TCGA-BP-4337-01A	TCGA-BP-4337	76	FEMALE	G4	Stage III	T3b	M0	N0	C3	C3	high	1	2	0	2	-1.1577	NA	15	1015.21	174.929	-662.057	0.316218	NA	NA	0.92892	0.986926	1.81738	NA	79	0.809176	6	6	19	0.0155112	0.0378548	0	0	0	0	0.0665496	0.255892	0	0.0951445	0.0339148	0	0	0.0349848	0.0985488
TCGA-BP-4340-01A-01R-1289-07	TCGA-BP-4340-01A	TCGA-BP-4340	70	FEMALE	G2	Stage I	T1b	M0	N0	C3	C3	low	1	562	0	562	-1.3242	NA	5	2400.9	27.5661	-1428.81	0.111468	NA	NA	NA	0.962944	1.57648	NA	63	0.205893	5	5	10	0	0.0110458	0.00860911	0	0	0	0.141504	0.242816	0.00734063	0.00456505	0.0773395	0	0.0504453	0.0549504	0.0669587
TCGA-BP-4341-01A-01R-1289-07	TCGA-BP-4341-01A	TCGA-BP-4341	67	MALE	G2	Stage III	T3a	M0	NX	C3	C3	low	1	1589	1	1589	-1.6569	NA	1	3117.57	-132.287	-1674.21	0.115676	NA	NA	NA	1	1.29782	NA	75	0.0454078	5	5	2	0	0.0246914	0.00632723	0	0	0	0.0148811	0.267739	0	0.0478234	0.126848	0	0.0810887	0.0821214	0.0215435
TCGA-BP-4346-01A-01R-1289-07	TCGA-BP-4346-01A	TCGA-BP-4346	57	MALE	G3	Stage III	T3b	M0	N0	C3	C3	low	1	1493	0	1493	-0.7201	NA	1	2450.91	718.879	-683.451	0.435516	NA	NA	0.368589	0.874429	1.39853	NA	89	0.0524965	5	5	6	0.0139389	0	0	0	0	0	0.0598991	0.126467	0.00702252	0	0.0175249	0.0018354	0.101011	0	0.0192442
TCGA-BP-4347-01A-01R-1289-07	TCGA-BP-4347-01A	TCGA-BP-4347	74	MALE	G2	Stage III	T3b	M0	NX	C3	C3	low	0	1367	0	1367	-1.1414	NA	8	2097.45	414.104	-741.414	0.178304	NA	NA	NA	0.88991	1.34184	NA	55	0.291715	0	0	3	0	0.0161911	0	0.00200077	0	0	0.0850743	0.189011	0	0.0531298	0.0438674	0	0.0544755	0	0.101694
TCGA-BP-4349-01A-01R-1289-07	TCGA-BP-4349-01A	TCGA-BP-4349	68	FEMALE	G2	Stage I	T1a	M0	NX	C3	C3	low	0	372	0	372	-1.8571	NA	0	1574.57	449.092	-1269.41	0.234015	NA	NA	NA	0.986294	1.51682	NA	65	0.0497302	6	6	2	0	0.0558201	0	0	0	0	0.0678598	0.245503	0	0.0226671	0.0508203	0	0.0426704	0.0312594	0.0561074
TCGA-BP-4351-01A-01R-1289-07	TCGA-BP-4351-01A	TCGA-BP-4351	51	FEMALE	G2	Stage III	T3a	M0	N0	C3	C3	low	0	970	1	873	-0.957	NA	24	1913.24	200.652	-1059.43	0.151027	NA	NA	NA	0.908888	2.0088	NA	102	0.620749	1	1	9	0	0.0684325	0	0	0	0	0.023183	0.31966	0	0.00519718	0.0568664	0	0.0436088	0.0346697	0.0095041
TCGA-BP-4355-01A-01R-1289-07	TCGA-BP-4355-01A	TCGA-BP-4355	59	FEMALE	G4	Stage III	T3a	M0	NX	C3	C3	low	1	953	0	953	-1.9194	NA	0	1117.24	761.313	-547.747	0.121761	NA	NA	NA	0.934517	1.59405	NA	107	0.0495843	5	5	19	0.038721	0	0.0170654	0	0	0	0.0342643	0.394142	0	0.0490134	0.16255	0	0.0327181	0	0.00669441
TCGA-BP-4758-01A-01R-1289-07	TCGA-BP-4758-01A	TCGA-BP-4758	40	MALE	G2	Stage I	T1a	M0	NX	C3	C3	low	0	2208	0	2208	-1.013	NA	2	2068.68	842.366	-927.129	0.234702	NA	NA	NA	0.865726	1.40799	NA	66	0.0823378	5	5	2	0	0	0.000102334	0	0	0	0.0701496	0.152284	0.00805475	0	0.0144343	0.00131362	0.0718835	0	0.0166456
TCGA-BP-4759-01A-01R-1289-07	TCGA-BP-4759-01A	TCGA-BP-4759	50	MALE	G2	Stage I	T1a	M0	NX	C3	C6	low	0	2372	0	2372	-0.8746	NA	NA	3402.63	420.934	-710.97	0.153225	NA	NA	NA	0.971865	1.78657	NA	81	0.109406	NA	NA	NA	0	0.0184322	0.0110899	0	0	0.00213319	0.0348308	0.28807	0	0.0239935	0.0624009	0	0.0147238	0.0526744	0
TCGA-BP-4762-01A-02R-1289-07	TCGA-BP-4762-01A	TCGA-BP-4762	42	MALE	G3	Stage I	T1a	M0	NX	C3	C3	low	1	1343	0	1343	-1.0114	NA	1	2386.66	223.399	-326.635	0.189287	NA	NA	0.889758	0.955502	1.63091	NA	59	0.133222	9	9	10	0	0.0810157	0	0.0236206	0	0	0.0342577	0.304049	0	0.0758924	0.0371905	0.00607487	0.0189057	0	0.0546972
TCGA-BP-4763-01A-01R-1289-07	TCGA-BP-4763-01A	TCGA-BP-4763	79	FEMALE	G2	Stage I	T1a	M0	NX	C3	C2	low	1	1270	0	1270	-1.1186	NA	8	455.142	658.432	-48.2034	0.262396	NA	NA	NA	0.932464	2.29906	NA	88	0.306272	0	0	6	0.0031656	0.00398117	0	0	0	0	0.148485	0.359446	0	0.0395926	0.0155076	0	0	0.038297	0.0108847
TCGA-BP-4765-01A-01R-1289-07	TCGA-BP-4765-01A	TCGA-BP-4765	43	MALE	G2	Stage I	T1a	M0	NX	C3	C3	low	0	2184	0	2184	-1.2595	NA	1	3114.98	358.472	-809.441	0.13557	NA	NA	NA	0.969724	1.07077	NA	71	0.0646018	6	6	4	0	0.015344	0	0.0109524	0	0	0.0370181	0.341082	0.00877141	0.0446673	0.146721	0	0.00687305	0.16373	0.101405
TCGA-BP-4766-01A-01R-1289-07	TCGA-BP-4766-01A	TCGA-BP-4766	43	FEMALE	G3	Stage I	T1a	M0	NX	C3	C3	low	0	1462	0	1462	-0.9668	NA	4	3299.13	-238.863	-1272.64	0.142884	NA	NA	NA	1	1.59694	NA	123	0.16183	10	10	6	0.01511	0	0	0	0	0.022298	0.00940948	0.530365	0.0549209	0	0.115737	0.0333228	0.0567087	0.0139064	0.0221914
TCGA-BP-4768-01A-01R-1289-07	TCGA-BP-4768-01A	TCGA-BP-4768	72	FEMALE	G2	Stage I	T1a	M0	N0	C3	C3	low	0	400	0	400	-1.3633	NA	23	4018.23	359.42	-1571.43	0.07969	NA	NA	NA	0.903539	2.1924	NA	111	0.730951	9	9	5	0.0291678	0	0	0	0	0.073425	0.0293027	0.348329	0.0363915	0	0.0272907	0.00611597	0.0693301	0	0.00338441
TCGA-BP-4771-01A-01R-1289-07	TCGA-BP-4771-01A	TCGA-BP-4771	62	MALE	G4	Stage IV	T3a	M1	N0	C3	C3	low	1	162	1	23	-0.6105	NA	NA	1194.56	632.476	-582.726	0.533576	NA	NA	0.869319	0.806418	2.05686	NA	72	0.205412	NA	NA	NA	0	0	0	0	0	0	0.0473735	0.108274	0	0.00583747	0.0298635	0.00313401	0.138721	0	0.0113219
TCGA-BP-4774-01A-01R-1289-07	TCGA-BP-4774-01A	TCGA-BP-4774	57	FEMALE	G2	Stage I	T1a	M0	NX	C3	C3	low	0	1885	0	1885	-1.3056	NA	1	1670.78	947.211	-1184.99	0.145547	NA	NA	NA	0.970065	1.69089	NA	75	0.0429433	2	2	4	0.00124772	0.000781355	0.00439746	0	0	0	0.0372252	0.278946	0.178763	0	0.0274314	0	0.0949205	0	0.0149379
TCGA-BP-4775-01A-01R-1289-07	TCGA-BP-4775-01A	TCGA-BP-4775	55	FEMALE	G2	Stage I	T1a	M0	NX	C3	C3	low	0	1843	0	1843	-0.673	NA	14	2879.2	577.886	-892.23	0.210358	NA	NA	0.688758	0.935995	0.918147	NA	114	0.495835	5	5	3	0	0.028149	0	0.018563	0	0	0.0964207	0.243572	0.0797616	0	0.0997942	0.00845698	0.0497026	0	0.0376833
TCGA-BP-4776-01A-01R-1289-07	TCGA-BP-4776-01A	TCGA-BP-4776	52	MALE	G2	Stage I	T1a	M0	NX	C3	C3	low	0	411	0	411	-1.389	NA	1	982.647	1529.69	-1229.99	0.193612	NA	NA	0.885897	0.975504	1.23204	NA	59	0.04813	5	5	2	0.0458198	0.00442417	0.0107911	0	0.00939787	0	0.0115167	0.0684273	0.129655	0	0.0719003	0	0.12106	0	0.184258
TCGA-BP-4777-01A-01R-1289-07	TCGA-BP-4777-01A	TCGA-BP-4777	46	MALE	G3	Stage I	T1a	M0	NX	C3	C3	low	0	1731	0	1731	-0.661	NA	2	560.681	1358.05	-655.426	0.543694	NA	NA	0.940373	0.93406	1.45481	NA	78	0.154023	5	5	3	0.00475783	0.0231283	0	0	0	0.0321434	0.0538166	0.242096	0	0.00296326	0.0100328	0.00514239	0.0861592	0	0.0129612
TCGA-BP-4789-01A-01R-1305-07	TCGA-BP-4789-01A	TCGA-BP-4789	48	MALE	G2	Stage I	T1a	M0	NX	C3	C3	low	0	1489	0	1489	-1.5128	NA	3	2276.82	250.749	-171.718	0.106834	NA	NA	NA	0.941432	1.24912	NA	41	0.0794601	4	4	19	0	0.0236466	0	0	0	0	0.0529948	0.31431	0	0.103701	0.0464184	0	0.0210889	0.0828193	0.00497844
TCGA-BP-4790-01A-01R-1305-07	TCGA-BP-4790-01A	TCGA-BP-4790	76	MALE	G2	Stage I	T1a	M0	NX	C3	C3	low	1	1111	0	1111	-1.3079	NA	2	2727.82	226.909	-35.6185	0.417056	NA	NA	0.930455	0.912108	1.60058	NA	109	0.0953483	5	5	19	0	0.0189547	0	0.0188423	0	0.0600335	0.0757712	0.264852	0	0.0236908	0.00863426	0	0.0453642	0	0.0162417
TCGA-BP-4961-01A-01R-1334-07	TCGA-BP-4961-01A	TCGA-BP-4961	47	MALE	G2	Stage I	T1a	M0	NX	C3	C3	low	0	1935	0	1935	-1.5725	0.12	1	1944.1	-112.081	-711.822	0.117952	13	15	NA	1	1.25936	0.840017	56	0.105532	2	2	19	0.00162402	0.0146367	0	0	0	0	0.0373092	0.419139	0	0.184692	0.0354112	0.0153928	0	0.0476772	0.00290008
TCGA-BP-4962-01A-01R-1334-07	TCGA-BP-4962-01A	TCGA-BP-4962	58	MALE	G2	Stage II	T2	M0	NX	C3	C3	low	0	1785	0	1785	-1.0055	0.24	5	1697.43	181.829	-642.476	0.425557	15	30	0.927056	0.833445	1.64836	1.06132	63	0.283365	4	4	6	0	0.0043524	0	0.0153444	0	0	0.0556653	0.262878	0	0.0198051	0.0225927	0.00636489	0.0789607	0	0.0205563
TCGA-BP-4963-01A-01R-1334-07	TCGA-BP-4963-01A	TCGA-BP-4963	63	MALE	G3	Stage I	T1b	M0	NX	C3	C3	low	0	1834	0	1834	-0.7888	NA	8	2925.66	288.127	-815.518	0.291416	41	39	NA	0.996185	1.60193	1.90747	75	0.257329	9	9	5	0	0.00563204	0	0	0	0.0359893	0.0518518	0.414274	0	0.0153546	0.0676968	0.0179062	0.0149255	0.0102053	0.023867
TCGA-BP-4965-01A-01R-1334-07	TCGA-BP-4965-01A	TCGA-BP-4965	46	MALE	G2	Stage I	T1a	M0	NX	C3	C3	low	0	1871	0	1871	-0.8825	0.02	1	1663.18	150.45	-626.776	0.14261	21	12	NA	0.976118	1.80307	1.39612	64	0.118937	9	9	9	0	0.0176789	0	0	0	0	0.0408619	0.395782	0	0.0807128	0.0643047	0.0296997	0.042555	0	0.0111185
TCGA-BP-4968-01A-01R-1334-07	TCGA-BP-4968-01A	TCGA-BP-4968	40	MALE	G3	Stage I	T1b	M0	N0	C3	C3	low	0	1746	0	1746	-0.8249	0.23	0	193.323	680.206	-987.656	0.228495	18	3	NA	0.807815	1.81685	1.06415	77	0.270654	5	5	4	0	0	0	0	0	0	0.0805964	0.169532	0	0.000806041	0.0293738	0.00194092	0.121684	0	0.0230215
TCGA-BP-4969-01A-01R-1334-07	TCGA-BP-4969-01A	TCGA-BP-4969	63	FEMALE	G2	Stage I	T1a	M0	NX	C3	C3	low	0	1794	0	1794	-1.3564	NA	23	1960.72	-437.703	-1331.99	0.130658	NA	NA	NA	0.988109	1.37908	NA	128	0.947729	5	5	9	0	0.0908903	0.00482692	0	0	0	0.0870767	0.271671	0	0.0676888	0.0461047	0	0.0826654	0.0177144	0.0686529
TCGA-BP-4971-01A-01R-1334-07	TCGA-BP-4971-01A	TCGA-BP-4971	40	MALE	G3	Stage III	T3a	M0	N0	C3	C3	low	0	1487	0	1487	-1.0767	0.09	5	173.459	67.3591	-90.6092	0.39597	13	94	NA	0.98791	1.7922	0.974433	72	0.146339	4	4	2	0.0397259	0	0	0.0244636	0	0.0582467	0.116791	0.198957	0	0.0666245	0.0623391	0	0.0513687	0	0.00512449
TCGA-BP-4972-01A-01R-1334-07	TCGA-BP-4972-01A	TCGA-BP-4972	43	FEMALE	G3	Stage III	T3a	M0	NX	C3	C3	low	0	1502	0	1502	-1.1681	0	2	2655.47	544.344	-399.997	0.147587	11	101	NA	0.994836	0.912221	0.832099	55	0.0808544	5	5	19	0	0.0255878	0	0	0	0.0691666	0.0441066	0.586659	0.0100609	0	0.0224643	0.0120114	0.033812	0	0.00513093
TCGA-BP-4973-01A-01R-1334-07	TCGA-BP-4973-01A	TCGA-BP-4973	47	MALE	G3	Stage III	T3a	M0	NX	C3	C3	low	0	1384	0	1384	-1.2333	0.23	2	2247.14	273.169	-1002.09	0.224217	17	2	NA	0.920567	1.50403	0.779059	91	0.180174	5	5	2	0.00855357	0.0077055	0.00110593	0	0	0	0.0850168	0.221972	0	0.0191824	0.0463334	0.0154592	0.052468	0	0.00763214
TCGA-BP-4974-01A-01R-1334-07	TCGA-BP-4974-01A	TCGA-BP-4974	58	MALE	G4	Stage IV	T3a	M1	N0	C3	C3	low	1	211	1	35	-1.2315	0.2	2	1888.42	480.588	-413.502	0.163961	21	1	0.973259	0.992797	1.04132	0.897377	89	0.109853	6	6	6	0.00317644	0.00207241	0.0245462	0	0	0	0.0403813	0.290751	0.0689268	0	0.0280152	0	0.0513654	0.00415768	0.0543412
TCGA-BP-4975-01A-01R-1334-07	TCGA-BP-4975-01A	TCGA-BP-4975	40	MALE	G3	Stage I	T1b	M0	NX	C3	C3	low	0	1433	0	1433	-1.0968	0	1	3793.17	-209.286	-965.799	0.133832	7	4	0.959059	0.987199	1.31048	0.346301	115	0.0892276	6	6	3	0	0.097829	0	0	0	0	0.0235724	0.442482	0	0.0494348	0.0620178	0.0130642	0.0231696	0.0209844	0.0376799
TCGA-BP-4981-01A-01R-1334-07	TCGA-BP-4981-01A	TCGA-BP-4981	75	FEMALE	G3	Stage III	T3a	M0	NX	C3	C3	low	1	1097	0	1097	-1.6388	0.03	2	1476.09	36.5727	-1583.34	0.167894	27	0	NA	0.961455	1.79379	1.14812	51	0.105184	10	10	6	0.00693039	0.000758856	0	0	0	0	0.049617	0.35919	0	0.00389222	0.0515484	0	0.0520311	0.0204332	0.027335
TCGA-BP-4982-01A-01R-1334-07	TCGA-BP-4982-01A	TCGA-BP-4982	42	MALE	G3	Stage I	T1b	M0	NX	C3	C3	low	0	1014	0	1014	-1.1661	NA	1	2773.3	178.172	-254.92	0.276137	23	1	NA	0.976021	1.29089	0.890873	111	0.0461012	5	5	2	0	0.0385461	0	0	0	0	0.0679782	0.350957	0	0.064023	0.0309753	0.013629	0.0478152	0	0.0415169
TCGA-BP-4987-01A-01R-1334-07	TCGA-BP-4987-01A	TCGA-BP-4987	41	FEMALE	G2	Stage I	T1b	M0	NX	C3	C3	low	0	1124	0	1124	-1.3094	0	4	3489.84	-674.167	-1262.5	0.158031	13	9	NA	0.974073	0.911057	0.544489	103	0.117021	5	5	5	0.00107216	0.000656835	0	0.00630861	0	0	0.0435051	0.306936	0	0.0725434	0.0415984	0.00391159	0.0735501	0	0.0278132
TCGA-BP-4989-01A-01R-1334-07	TCGA-BP-4989-01A	TCGA-BP-4989	58	MALE	G3	Stage III	T3a	M0	N0	C3	C3	low	0	118	0	118	-0.4804	0.04	9	-2463.87	744.576	-160.429	0.40852	28	17	NA	0.822381	2.29927	1.63385	151	0.380424	8	8	7	0	0.0993397	0.00513101	0	0	0	0.022435	0.144341	0.014062	0	0.0135881	0.0119499	0.105227	0	0.0252533
TCGA-BP-4991-01A-01R-1334-07	TCGA-BP-4991-01A	TCGA-BP-4991	54	MALE	G2	Stage I	T1a	M0	NX	C3	C3	low	0	1413	0	1413	-1.0713	0.1	2	2609.78	454.89	-328.662	0.160872	17	32	NA	1	0.928405	1.08481	117	0.137758	8	8	5	0.0113294	0	0.000423501	0	0	0	0.0660775	0.419392	0	0.0807073	0.083597	0.0100143	0.0642893	0.0365477	0.0030335
TCGA-BP-4993-01A-02R-1420-07	TCGA-BP-4993-01A	TCGA-BP-4993	58	MALE	G3	Stage I	T1a	M0	NX	C3	C3	low	0	177	0	177	-1.551	NA	1	1921.65	796.753	-909.537	0.130621	22	17	NA	NA	1.05716	1.5157	65	0.0627969	5	5	3	0	0.0124017	0	0.0101103	0	0	0.0463085	0.266735	0	0.0688031	0.0529842	0	0.0365661	0	0.0198384
TCGA-BP-4999-01A-01R-1334-07	TCGA-BP-4999-01A	TCGA-BP-4999	56	MALE	G2	Stage I	T1a	M0	NX	C3	C3	low	0	1266	0	1266	-1.3099	0	4	2287.24	139.312	-623.248	0.139375	22	68	NA	1	1.10015	1.08615	80	0.129268	0	0	19	0	0.0306209	0	0	0	0	0.0721533	0.351718	0	0.133867	0.072159	0.00665878	0.0252761	0.0339363	0.0142609
TCGA-BP-5000-01A-01R-1334-07	TCGA-BP-5000-01A	TCGA-BP-5000	40	MALE	G3	Stage I	T1b	M0	NX	C3	C3	low	0	563	0	563	-0.9911	0.17	9	1448.85	685.847	-958.403	0.334239	15	19	NA	0.967857	1.70898	0.869674	71	0.237167	8	8	8	0	0	0	0	0	0	0.048886	0.301029	0	0.00527028	0.0232873	0	0.0500252	0	0.0579331
TCGA-BP-5001-01A-01R-1334-07	TCGA-BP-5001-01A	TCGA-BP-5001	43	FEMALE	G2	Stage I	T1b	M0	NX	C3	C3	low	0	1177	0	1177	-1.5423	NA	1	2491.98	39.5441	-1811.41	0.159452	17	0	NA	0.971398	1.67675	0.783436	133	0.0921214	9	9	3	0.0706658	0	0.00670352	0.00133391	0	0	0.0471914	0.115874	0	0.0218344	0.0384592	0	0.103573	0	0.0171452
TCGA-BP-5004-01A-01R-1334-07	TCGA-BP-5004-01A	TCGA-BP-5004	53	MALE	G3	Stage I	T1a	M0	NX	C3	C3	low	0	1126	0	1126	-0.9115	0	5	2951.74	-160.493	-866.739	0.189312	19	122	NA	0.990576	1.64906	1.09942	98	0.261886	10	10	14	0	0.0202221	0	0	0	0.245085	0.0681698	0.354878	0	0.0248253	0	0.0114979	0.00995361	0	0.00390336
TCGA-BP-5007-01A-01R-1334-07	TCGA-BP-5007-01A	TCGA-BP-5007	45	MALE	G2	Stage II	T2	M0	N0	C3	C3	low	0	1140	0	1140	-1.2952	0	0	3093.38	211.131	-938.82	0.153106	12	6	NA	0.890738	1.08911	0.694422	97	0.056975	4	4	6	0	0.00418506	0	0	0	0	0.0718601	0.277967	0	0.0289325	0.0226869	0.00180077	0.0658313	0	0.052238
TCGA-BP-5008-01A-01R-1334-07	TCGA-BP-5008-01A	TCGA-BP-5008	46	MALE	G2	Stage I	T1a	M0	NX	C3	C3	low	0	1071	0	1071	-1.0458	0.06	2	1675.84	1637.06	-149.085	0.293863	18	13	NA	0.976762	1.19497	1.06756	91	0.0966186	5	5	7	0	0.0536035	0	0.000738135	0	0	0.087572	0.261391	0.0686834	0	0.0654758	0	0.00556439	0	0.0040733
TCGA-BP-5168-01A-01R-1420-07	TCGA-BP-5168-01A	TCGA-BP-5168	75	MALE	G2	Stage I	T1a	M0	NX	C3	C3	low	1	1463	0	1463	-1.4226	NA	3	3244.77	180.615	-1153.28	0.119398	33	122	NA	0.978607	1.26269	2.47004	54	0.0989338	2	2	2	0	0.00981329	0	0	0	0	0.0978435	0.334574	0.0291731	0	0.0164712	0	0.0914413	0	0.00514018
TCGA-BP-5170-01A-01R-1426-07	TCGA-BP-5170-01A	TCGA-BP-5170	55	MALE	G2	Stage I	T1a	M0	NX	C3	C3	low	0	2412	0	2412	-1.4991	0	2	2264	734.736	-1087.97	0.302488	16	9	NA	0.961405	1.97006	0.91549	55	0.122947	5	5	8	0	0.0442913	0.00898478	0	0	0	0.0203258	0.510542	0.072727	0	0.0114928	0	0.0135052	0	0.00743174
TCGA-BP-5173-01A-01R-1426-07	TCGA-BP-5173-01A	TCGA-BP-5173	75	MALE	G2	Stage I	T1a	M0	NX	C3	C3	low	1	62	0	62	-0.7867	0.1	26	3125.71	170.773	-912.387	0.172636	43	1	NA	0.709863	0.904058	1.86635	69	0.758594	4	4	4	0	0	0	0.00132366	0	0	0.0595496	0.196203	0	0.0292378	0.0178289	0.00238299	0.0864021	0	0.0068725
TCGA-BP-5174-01A-01R-1426-07	TCGA-BP-5174-01A	TCGA-BP-5174	45	FEMALE	G2	Stage I	T1a	M0	NX	C3	C3	low	0	2257	0	2257	-1.1389	0	1	1779.64	-426.222	-1285.69	0.242683	13	38	NA	0.859704	1.21931	0.928117	71	0.0936504	4	4	3	0.0131858	0	0	0	0	0	0.0523549	0.347309	0	0.0441814	0.0683246	0	0.0597973	0	0.0227273
TCGA-BP-5176-01A-01R-1426-07	TCGA-BP-5176-01A	TCGA-BP-5176	78	FEMALE	G2	Stage I	T1a	M0	NX	C3	C3	low	1	1590	0	1590	-1.3763	0.01	1	2280.53	353.515	-1327.67	0.20883	42	121	NA	0.965899	1.39017	2.6343	78	0.0931282	4	4	2	0	0	0	0	0	0	0.0624555	0.343059	0	0.0341839	0.0314623	0	0.0375282	0.0565445	0.0245549
TCGA-BP-5177-01A-01R-1426-07	TCGA-BP-5177-01A	TCGA-BP-5177	46	FEMALE	G3	Stage I	T1a	M0	NX	C3	C3	low	0	293	0	293	-1.3196	0.08	5	1391.49	448.928	-585.99	0.178705	18	45	NA	1	1.33724	0.982089	94	0.251128	11	11	8	1.66e-05	0.000833248	0	0	0	0	0.105146	0.234847	0	0.0413781	0.072029	0	0.0638411	0	0.0405715
TCGA-BP-5180-01A-01R-1426-07	TCGA-BP-5180-01A	TCGA-BP-5180	53	MALE	G2	Stage I	T1a	M0	NX	C3	C3	low	0	2263	0	2263	-0.9041	0	6	3232.34	421.367	-1064.16	0.187055	14	3	NA	0.979454	1.69667	0.975506	61	0.947729	5	5	5	0.00173984	0.00521485	0	0	0	0.0385674	0.0638352	0.324192	0.0412445	0	0.0694013	0.00122067	0.0323752	0	0.011954
TCGA-BP-5183-01A-01R-1426-07	TCGA-BP-5183-01A	TCGA-BP-5183	57	MALE	G3	Stage III	T3a	M0	NX	C3	C3	low	0	1291	1	485	-0.9757	0	5	2825.06	-90.307	-960.235	0.252229	13	43	NA	0.891595	2.09809	1.11762	55	0.315102	4	4	5	0.0199359	0	0	0	0	0	0.0637336	0.281483	0	0.0022913	0.0222061	0.00124175	0.0504278	0	0.0351996
TCGA-BP-5184-01A-01R-1426-07	TCGA-BP-5184-01A	TCGA-BP-5184	54	MALE	G3	Stage I	T1a	M0	NX	C3	C3	low	0	1133	0	1133	-1.1204	0	2	2582.62	-23.9744	-779.416	0.2214	11	38	NA	0.975685	1.00591	0.588966	49	0.0357156	4	4	3	0.0264996	0.00904688	0	0	0	0	0.050194	0.427516	0	0.01685	0.0172795	0	0.0238017	0	0.00169512
TCGA-BP-5185-01A-01R-1426-07	TCGA-BP-5185-01A	TCGA-BP-5185	56	MALE	G3	Stage I	T1a	M0	NX	C3	C3	low	0	1132	1	736	-1.1183	0.04	20	2435.32	254.646	-1369.37	0.10758	27	90	NA	1	0.842174	2.045	100	0.621672	1	1	19	0	0.0128498	0	0	0	0	0.0325064	0.217272	0	0.0438835	0.0217543	0	0.109314	0	0.0659405
TCGA-BP-5186-01A-01R-1426-07	TCGA-BP-5186-01A	TCGA-BP-5186	50	FEMALE	G2	Stage I	T1a	M0	N0	C3	C3	low	0	693	0	693	-1.4005	0	0	3068.88	-98.302	-997.062	0.18563	18	23	NA	0.927766	1.18628	0.830214	54	0.0205119	3	3	19	0	0.1107	0	0	0	0	0.0364323	0.25904	0	0.0635562	0.0212185	0	0.0336554	0	0.122204
TCGA-BP-5187-01A-01R-1426-07	TCGA-BP-5187-01A	TCGA-BP-5187	54	MALE	G2	Stage I	T1a	M0	NX	C3	C3	low	0	406	0	406	-1.0544	0.03	4	2469.27	570.549	-379.837	0.292236	39	6	NA	0.951722	1.97443	1.45598	51	0.129317	0	0	4	0	0.058883	0	0	0	0	0.107231	0.21264	0.0142224	0.00180442	0.0211515	0.00451169	0.0628399	0	0.0166762
TCGA-BP-5189-01A-02R-1426-07	TCGA-BP-5189-01A	TCGA-BP-5189	60	MALE	G4	Stage I	T1b	M0	NX	C3	C3	low	1	822	1	634	-1.2399	0	3	2541.47	267.478	-769.41	0.307177	28	125	NA	0.989312	1.12753	1.18809	59	0.138929	2	2	6	0	0.0235826	0	0	0	0	0.053301	0.380589	0	0.0201677	0.0939921	0.0290096	0.0178846	0.012028	0.0184808
TCGA-BP-5190-01A-01R-1426-07	TCGA-BP-5190-01A	TCGA-BP-5190	61	MALE	G3	Stage I	T1a	M0	NX	C3	C3	low	0	1011	0	1011	-1.4062	0	1	1790.62	512.705	-1211.49	0.248111	18	93	NA	0.867825	1.67222	0.996187	60	0.0760682	4	4	6	0.0187892	0	0.00339287	0	0	0	0.0447545	0.347087	0	0.0327213	0.0316783	0.00125018	0.0668635	0	0.0134746
TCGA-BP-5192-01A-01R-1426-07	TCGA-BP-5192-01A	TCGA-BP-5192	59	MALE	G2	Stage I	T1a	M0	NX	C3	C3	low	0	714	0	714	-1.5423	0	1	3986.4	578.152	-1007.92	0.0523462	17	63	NA	0.904336	1.03171	1.0811	139	0.0723857	7	7	8	0	0.00206923	0.0233798	0	0	0	0.0574759	0.297407	0	0.0859728	0.015383	0	0.0388768	0.013348	0.0862135
TCGA-BP-5194-01A-02R-1426-07	TCGA-BP-5194-01A	TCGA-BP-5194	39	MALE	G2	Stage I	T1a	M0	NX	C3	C3	low	0	408	0	408	-1.1359	0	1	3453.85	167.75	-597.092	0.153874	14	5	0.576028	0.991279	0.987128	0.61352	47	0.0427272	5	5	4	0	0.164412	0	0.00697081	0	0	0.0425347	0.363799	0	0.0597663	0.0163053	0	0.0487881	0	0.0365215
TCGA-BP-5195-01A-02R-1426-07	TCGA-BP-5195-01A	TCGA-BP-5195	75	MALE	G2	Stage I	T1a	M0	NX	C3	C3	low	0	749	0	749	-1.3404	0.13	1	1927.82	349.62	-757.407	0.2944	35	81	0.882676	0.994193	1.16812	1.73143	67	0.0606349	5	5	3	0	0.00601649	0	0	0	0	0.0520211	0.403259	0	0.0260785	0.0983116	0.0225239	0.0274754	0.00594866	0.0130153
TCGA-BP-5200-01A-01R-1426-07	TCGA-BP-5200-01A	TCGA-BP-5200	44	MALE	G4	Stage II	T2	M0	NX	C3	C3	low	0	1063	0	1063	-1.3083	0.04	24	1587.43	1418.89	-726.161	0.249411	20	39	0.664742	0.954965	1.24366	0.970178	51	0.605032	0	0	3	0	0.0506795	0.0062905	0	0.00120942	0	0.0325238	0.255238	0.0649285	0	0.0365531	0	0.104865	0	0.0229141
TCGA-BP-5202-01A-02R-1426-07	TCGA-BP-5202-01A	TCGA-BP-5202	75	MALE	G2	Stage III	T3a	M0	NX	C3	C3	low	0	29	0	29	-1.2248	0.01	0	2670.58	-35.3671	-715.743	0.145627	20	15	NA	0.971272	1.06672	1.0061	103	0.0570548	7	7	8	0	0.00871566	0.0131416	0	0	0	0.0752499	0.410783	0	0.0173938	0.131516	0	0.0504787	0.0298277	0.0162296
TCGA-CJ-4634-01A-02R-1325-07	TCGA-CJ-4634-01A	TCGA-CJ-4634	60	FEMALE	G2	Stage I	T1b	M0	NX	C3	C3	low	0	3498	0	3498	-1.3797	0.05	2	3244.13	-583.4	-1036.37	0.158972	32	110	NA	0.992454	1.22676	1.85768	93	0.0636707	4	4	2	0	0.0131317	0	0	0	0	0.0184408	0.504925	0	0.109965	0.0589285	0.000858685	0.00152143	0.0532155	0.0129225
TCGA-CJ-4635-01A-02R-1305-07	TCGA-CJ-4635-01A	TCGA-CJ-4635	48	MALE	G3	Stage I	T1b	M0	NX	C3	C3	low	0	1416	0	1416	-0.7269	NA	22	2711.19	-604.479	-879.963	0.209276	NA	NA	NA	0.973847	1.90191	NA	100	0.545977	1	1	2	0.003781	0	0	0	0	0.0811299	0.0390352	0.261938	0.0048783	0	0	0.00370285	0.0407599	0	0.0137297
TCGA-CJ-4638-01A-02R-1325-07	TCGA-CJ-4638-01A	TCGA-CJ-4638	46	FEMALE	G4	Stage IV	T3a	M1	N1	C3	C3	low	1	431	1	70	-0.7376	0.23	2	3174.63	-156.919	-813.384	0.173302	29	158	NA	0.968629	2.4661	1.71089	73	0.239714	6	6	6	0.014898	0	0.00677255	0	0	0.0193152	0.0230791	0.103987	0	0.065534	0.0732116	0.000734074	0.0652604	0	0.111375
TCGA-CJ-4639-01A-02R-1325-07	TCGA-CJ-4639-01A	TCGA-CJ-4639	49	FEMALE	G2	Stage II	T2	M0	N0	C3	C3	low	0	3229	0	3229	-1.2446	0	2	2897.53	757.791	-1002.82	0.202344	30	85	NA	0.9668	1.12049	1.6274	63	0.0945383	5	5	5	0	0.00882949	0.00487298	0	0	0	0.0625238	0.150596	0	0.00498751	0.0327199	0	0.0453037	0	0.0175599
TCGA-CJ-4640-01A-02R-1325-07	TCGA-CJ-4640-01A	TCGA-CJ-4640	49	MALE	G4	Stage III	T3a	M0	N0	C3	C3	low	0	3480	0	3480	-0.9634	0.04	7	2164.79	-10.9677	-1165.92	0.373087	36	113	NA	0.885339	1.8225	1.34159	74	0.260896	10	10	12	0	0	0	0.00763675	0	0	0.112856	0.292716	0	0.0188421	0.0126199	0.00132974	0.026984	0	0.00401477
TCGA-CJ-4643-01A-02R-1325-07	TCGA-CJ-4643-01A	TCGA-CJ-4643	67	FEMALE	G3	Stage II	T2b	M0	N0	C3	C3	low	0	1793	0	1793	-1.6455	0.13	2	2384.07	214.522	-862.495	0.186747	41	247	NA	0.969129	1.59705	1.90207	74	0.0840307	5	5	3	0	0.0401929	0.000967998	0	0	0	0.0871899	0.250076	0	0.0198874	0.13141	0	0.0497308	0.00258815	0.0182023
TCGA-CJ-4870-01A-01R-1305-07	TCGA-CJ-4870-01A	TCGA-CJ-4870	58	FEMALE	G2	Stage III	T3a	M0	NX	C3	C3	low	0	1498	0	1498	-1.6735	NA	NA	1990.33	-18.4024	-1626.54	0.0867694	NA	NA	NA	0.982568	0.731779	NA	109	0.0993449	NA	NA	NA	0	0.0517144	0.0159018	0	0	0	0.0193159	0.413084	0	0.0521554	0.139287	0	0.0210782	0.0375517	0.00134313
TCGA-CJ-4871-01A-01R-1305-07	TCGA-CJ-4871-01A	TCGA-CJ-4871	63	MALE	G4	Stage IV	T3a	M1	NX	C3	C3	low	0	2423	1	169	-0.9033	NA	1	839.78	438.734	-827.901	0.229539	NA	NA	NA	0.94207	1.66311	NA	69	0.495953	5	5	3	0	0.0225461	0	0	0	0	0.0844314	0.392953	0	0.0125057	0.0602469	0.00814322	0.0198072	0.0234852	0.00224204
TCGA-CJ-4874-01A-01R-1305-07	TCGA-CJ-4874-01A	TCGA-CJ-4874	73	FEMALE	G3	Stage I	T1b	M0	N0	C3	C3	low	0	2283	0	2283	-1.179	NA	1	1581.29	716.905	-862.152	0.321991	NA	NA	NA	0.870262	1.44415	NA	64	0.0547418	5	5	19	0	0.00559409	0	0.00271804	0	0	0.0899946	0.21863	0.000107569	0.0148291	0.0282945	0.000392229	0.0876498	0	0.00467172
TCGA-CJ-4875-01A-01R-1305-07	TCGA-CJ-4875-01A	TCGA-CJ-4875	67	MALE	G3	Stage IV	T3a	M1	NX	C3	C3	low	1	3554	1	531	-0.7612	NA	8	1214.54	157.576	-1256.09	0.131421	NA	NA	NA	0.615132	2.20797	NA	81	0.236804	3	3	5	0	0	0	0	0	0	0.0117814	0.134272	0.00278556	0.00108663	0.0273703	0	0.115259	0	0.00735819
TCGA-CJ-4876-01A-01R-1305-07	TCGA-CJ-4876-01A	TCGA-CJ-4876	57	MALE	G3	Stage II	T2b	M0	N0	C3	C3	low	0	1955	0	1955	-1.4379	NA	8	1996.93	532.099	-1250.58	0.2265	NA	NA	0.956155	0.937237	1.79721	NA	118	0.325498	12	12	12	0	0	0	0	0	0	0.051063	0.0730419	0.00356219	0	0.0143837	0	0.108555	0	0.0588112
TCGA-CJ-4878-01A-01R-1305-07	TCGA-CJ-4878-01A	TCGA-CJ-4878	71	FEMALE	G2	Stage III	T3a	M0	NX	C3	C3	low	0	2186	0	2186	-1.1293	NA	3	1691.19	-244.062	-708.351	0.0828503	NA	NA	NA	0.969022	1.26259	NA	79	0.108272	14	14	6	0.013429	0	0.0109714	0	0	0	0.0472265	0.238504	0	0.160976	0.125366	0.0221213	0	0.0553606	0.0421412
TCGA-CJ-4885-01A-01R-1305-07	TCGA-CJ-4885-01A	TCGA-CJ-4885	64	MALE	G3	Stage IV	T3a	M1	NX	C3	C3	low	0	3451	1	2041	-1.7912	NA	11	1592.15	-15.1191	-1317.11	0.0826512	NA	NA	NA	0.898502	1.76751	NA	68	0.307314	5	5	5	0	0.0156494	0.00415195	0	0	0	0.0353479	0.293757	0	0.0658482	0.088458	0.00201631	0.0861752	0	0.00571935
TCGA-CJ-4886-01A-01R-1305-07	TCGA-CJ-4886-01A	TCGA-CJ-4886	42	FEMALE	G3	Stage I	T1a	M0	NX	C3	C3	low	0	1952	0	1952	-1.2382	NA	1	1890.08	456.792	-819.06	0.244152	NA	NA	0.744484	0.974336	1.27596	NA	65	0.0589925	6	6	19	0	0.010155	0	0.000425419	0	0	0.112639	0.249287	0.000329414	0.0381265	0.00363549	0.00234741	0.114695	0	0.0133974
TCGA-CJ-4887-01A-01R-1305-07	TCGA-CJ-4887-01A	TCGA-CJ-4887	48	MALE	G3	Stage IV	T3a	M1	NX	C3	C3	low	1	932	1	322	-0.7703	NA	6	1925.39	420.745	-946.222	0.450871	NA	NA	0.783894	0.930145	0.947267	NA	91	0.18266	5	5	5	0	0.00822413	0	0.0073007	0	0	0.0795353	0.242608	0.0320284	0	0.0222773	0.00662941	0.0426023	0	0.00500489
TCGA-CJ-4889-01A-01R-1305-07	TCGA-CJ-4889-01A	TCGA-CJ-4889	63	FEMALE	G4	Stage I	T1a	M0	NX	C3	C3	low	0	1946	0	1946	-1.3507	NA	NA	1228.36	1036.11	-650.747	0.567704	NA	NA	0.52209	0.833071	1.54531	NA	73	0.134713	NA	NA	NA	0.135934	0.0343641	0	0	0	0	0.0717918	0.307351	0	0.0161434	0.00946469	0	0	0.00506502	0.0933281
TCGA-CJ-4892-01A-01R-1305-07	TCGA-CJ-4892-01A	TCGA-CJ-4892	65	FEMALE	G2	Stage I	T1b	M0	N0	C3	C3	low	0	1521	0	1521	-1.2435	NA	3	2430.12	309.294	-1107.89	0.241553	NA	NA	NA	0.85622	1.38781	NA	65	0.117463	5	5	8	0	0	0	0	0	0	0.020825	0.0949096	0	0.00753102	0.0370808	0	0.125539	0	0.0259455
TCGA-CJ-4893-01A-01R-1305-07	TCGA-CJ-4893-01A	TCGA-CJ-4893	76	FEMALE	G3	Stage I	T1b	M0	NX	C3	C3	low	0	750	0	750	-1.7312	NA	6	2016.69	833.98	-1222.84	0.249454	NA	NA	0.97726	0.887145	1.51271	NA	67	0.243863	6	6	4	0	0.00681229	0	0.012058	0	0	0.079459	0.204977	0	0.0391682	0.0469903	0.00304462	0.0441864	0	0.00969615
TCGA-CJ-4894-01A-01R-1305-07	TCGA-CJ-4894-01A	TCGA-CJ-4894	58	MALE	G3	Stage III	T3a	M0	N0	C3	C3	low	1	841	1	158	-0.809	NA	3	2714.16	390.481	-863.728	0.269101	NA	NA	0.72158	0.88017	1.60782	NA	65	0.183774	7	7	10	0	0.00774632	0	0.00918138	0	0	0.0888924	0.132986	0.0161503	0	0.0309999	0	0.0727131	0	0.0409893
TCGA-CJ-4897-01A-03R-1426-07	TCGA-CJ-4897-01A	TCGA-CJ-4897	79	FEMALE	G3	Stage III	T3a	M0	NX	C3	C3	low	0	3341	1	1423	-1.3022	NA	29	2848.7	299.384	-1025.61	0.129403	NA	NA	0.808757	0.985762	1.0868	NA	59	0.643821	5	5	3	0	0.0464567	0	0.00230716	0	0	0.105589	0.238192	0	0.0641334	0.0527397	0	0.0436949	2.69e-05	0.0317899
TCGA-CJ-4899-01A-01R-1334-07	TCGA-CJ-4899-01A	TCGA-CJ-4899	42	MALE	G2	Stage I	T1b	M0	NX	C3	C3	low	0	1528	0	1528	-1.046	0	3	1992.76	353.362	-342.247	0.175779	19	42	0.960677	0.927423	1.29501	0.829923	99	0.144678	2	2	4	0	0.0162397	0	0	0	0	0.0235108	0.561921	0	0.0994824	0.00814114	0.00747405	0.0200486	0	0.0434634
TCGA-CJ-4902-01A-01R-1426-07	TCGA-CJ-4902-01A	TCGA-CJ-4902	61	MALE	G3	Stage III	T3a	M0	NX	C3	C3	low	0	1520	0	1520	-1.0118	0.03	1	1697.49	721.838	-664.218	0.31127	26	8	0.928256	0.977035	1.44759	1.47668	82	0.102022	7	7	12	0	0.0148244	0	0	0	0.0491509	0.0670852	0.337097	0	0.0422957	0.0340734	0.00238994	0.0651765	0	0.0274791
TCGA-CJ-4903-01A-01R-1426-07	TCGA-CJ-4903-01A	TCGA-CJ-4903	50	MALE	G3	Stage I	T1b	M0	NX	C3	C3	low	0	1560	0	1560	-1.5289	0.39	1	2922.86	505.094	-1274.65	0.218572	25	373	0.198196	0.984645	1.01101	1.24256	85	0.525589	5	5	11	0	0.00728374	0	0.00155117	0	0	0.0479054	0.244367	0.0787789	0	0.0681941	0.00231442	0.101426	0	0.0210903
TCGA-CJ-4904-01A-02R-1426-07	TCGA-CJ-4904-01A	TCGA-CJ-4904	60	FEMALE	G3	Stage IV	T3a	M1	N0	C3	C3	low	0	3302	1	278	-1.2725	0.17	4	1267.71	439.235	-758.908	0.172163	3	17	NA	0.990243	1.25353	1.24727	49	0.129096	0	0	2	0	0.0333166	0	0	0	0	0.169457	0.266883	0	0.0492192	0.0627911	0	0.00315364	0.011566	0.00430772
TCGA-CJ-4905-01A-02R-1426-07	TCGA-CJ-4905-01A	TCGA-CJ-4905	62	FEMALE	G2	Stage I	T1a	M0	NX	C3	C3	low	0	1496	0	1496	-1.3102	0	2	2601.39	-168.09	-469.827	0.131122	18	182	NA	0.986706	0.837269	1.23467	51	0.0959575	5	5	3	0	0.00739906	0	0	0	0	0.0642053	0.256195	0	0.106992	0.106011	0	0.0234499	0.111565	0.00563005
TCGA-CJ-4907-01A-01R-1426-07	TCGA-CJ-4907-01A	TCGA-CJ-4907	58	MALE	G3	Stage III	T3b	M0	NX	C3	C3	low	0	1499	0	1499	-1.235	0.47	0	3243.93	234.802	-731.232	0.160043	29	3	NA	0.905307	1.31633	1.56229	86	0.535197	5	5	4	0	0.040224	0.00263387	0	0	0	0.0460663	0.463391	0	0.0637496	0.0606802	0.0126555	0.0634316	0	0.0144586
TCGA-CJ-4908-01A-01R-1426-07	TCGA-CJ-4908-01A	TCGA-CJ-4908	38	MALE	G2	Stage I	T1a	M0	NX	C3	C3	low	0	1531	0	1531	-1.1976	0.09	1	1913.28	297.28	-337.365	0.209977	15	1	NA	0.876898	1.78388	0.672428	141	0.0596793	3	3	4	0	0.0182861	0.00244485	0	0	0	0.0262566	0.311317	0	0.0238543	0.107365	0	0	0.0144744	0.0218531
TCGA-CJ-4916-01A-01R-1426-07	TCGA-CJ-4916-01A	TCGA-CJ-4916	69	FEMALE	G3	Stage III	T3a	M0	NX	C3	C3	low	0	1373	0	1373	-1.0779	0	2	2669.03	1043.44	-1088.15	0.434095	22	4	0.846302	0.837036	1.41894	1.05835	78	0.104949	6	6	3	0.00526541	0	0	0.00193235	0	0	0.0823386	0.153776	0.0112679	0	0.00965595	0	0.108245	0	0.0237515
TCGA-CJ-5672-01A-11R-1541-07	TCGA-CJ-5672-01A	TCGA-CJ-5672	84	MALE	G3	Stage I	T1a	M0	NX	C3	C3	low	1	2190	0	2190	-1.1823	0.02	6	1689.12	855.219	-1371.58	0.346053	39	118	0.995253	0.739993	1.60252	2.25384	107	0.249038	11	11	19	0	0.00171851	0	0.00242706	0	0	0.076964	0.253026	0.00283559	0.00315501	0.0201556	0.00515878	0.0767343	0	0.0139581
TCGA-CJ-5675-01A-11R-1541-07	TCGA-CJ-5675-01A	TCGA-CJ-5675	70	MALE	G3	Stage II	T2a	M0	NX	C3	C3	low	0	3936	1	900	-1.2473	0	3	2787.64	525.695	-1282.95	0.402446	28	15	NA	0.848656	1.46238	1.55474	61	0.165687	10	10	3	0	0.00075217	0	0	0	0	0.0665104	0.160547	0.0139321	0	0.0320723	0.0046531	0.0953696	0	0.000416757
TCGA-CJ-5678-01A-11R-1541-07	TCGA-CJ-5678-01A	TCGA-CJ-5678	62	MALE	G3	Stage IV	T2b	M1	N0	C3	C2	low	1	574	1	399	-0.9097	0	3	1618.49	1118.83	-1150.35	0.348194	21	194	0.921003	0.963269	1.89222	1.171	152	0.175769	7	7	11	0.000854705	0.0105888	0	0.0183505	0	0	0.0965341	0.121155	0	0.0409663	0.0211428	0.00573395	0.0872153	0	0.0752223
TCGA-CJ-5684-01A-11R-1541-07	TCGA-CJ-5684-01A	TCGA-CJ-5684	61	MALE	G2	Stage III	T3a	M0	NX	C3	C3	low	0	2231	0	2231	-1.2353	0.12	3	2707.22	411.869	-800.023	0.236792	16	8	NA	0.909468	1.54367	0.890708	72	0.187912	3	3	19	0	0.0150045	0	0.00465637	0	0	0.0764074	0.192772	0	0.0544559	0.0209793	0	0.0699735	0	0.0164562
TCGA-CJ-5686-01A-11R-1672-07	TCGA-CJ-5686-01A	TCGA-CJ-5686	59	FEMALE	G3	Stage I	T1b	M0	NX	C3	C3	low	0	2038	0	2038	-1.3416	0	2	1883.67	67.2857	-1084.64	0.388174	28	180	0.759637	0.981659	2.03204	1.55855	34	0.122853	3	3	3	0	0.0233534	0	0	0	0	0.0630835	0.344007	0	0.0109746	0.0692501	0.0203405	0.0160439	0	0.0171271
TCGA-CJ-6031-01A-11R-1672-07	TCGA-CJ-6031-01A	TCGA-CJ-6031	54	MALE	G3	Stage I	T1b	M0	NX	C3	C3	low	0	1906	0	1906	-0.7749	0.07	2	1539.3	585.71	-414.419	0.361908	28	287	0.818842	0.930099	1.53975	1.74147	66	0.100345	5	5	4	0	0.029036	0	0	0	0.0311192	0.0488745	0.427426	0	0.0398194	0.0022203	0.00945271	0.0248026	0	0.0258036
TCGA-CJ-6032-01A-11R-1672-07	TCGA-CJ-6032-01A	TCGA-CJ-6032	63	FEMALE	G3	Stage II	T2	M0	NX	C3	C3	low	0	3639	0	3639	-1.4142	0.09	6	2108.1	937.111	-1191.21	0.228971	17	1	NA	0.932809	1.60772	1.22559	39	0.219704	12	12	5	0	0	0	0	0	0	0.0693973	0.350435	0.0200995	0	0.0449789	0	0.0755328	0	0.00528221
TCGA-CW-5583-01A-02R-1541-07	TCGA-CW-5583-01A	TCGA-CW-5583	51	FEMALE	G2	Stage I	T1a	M0	NX	C3	C3	low	0	2489	0	2489	-1.4956	0	3	4198.3	121.496	-722.244	0.0774382	11	58	NA	0.857144	1.33433	0.611795	66	0.0847656	3	3	19	0	0.0468098	0.0106989	0	0	0	0.086054	0.263827	0	0.091473	0.0596999	0.022031	0.0488151	0.0598436	0.028331
TCGA-CW-5584-01A-01R-1541-07	TCGA-CW-5584-01A	TCGA-CW-5584	74	MALE	G3	Stage III	T3b	M0	N1	C3	C3	low	1	164	1	102	-1.2228	0.03	1	2774.46	472.393	-804.553	0.2479	NA	NA	0.946805	0.98849	1.93408	0	65	0.14863	6	6	5	0	0.0418969	0	0.00547188	0	0	0.0738415	0.353226	0	0.0444977	0.193118	0.0063076	0	0.0397651	0.00821804
TCGA-CW-5585-01A-01R-1541-07	TCGA-CW-5585-01A	TCGA-CW-5585	51	MALE	G2	Stage IV	T3b	M1	N0	C3	C3	low	0	2609	0	2609	-1.4293	0	3	3657.23	-189.957	-1367.42	0.0476309	14	10	NA	1	1.14941	1.07011	88	0.150276	10	10	10	0	0.00344483	0.0203369	0	0	0	0.0368239	0.316984	0	0.0446065	0.182944	0	0.0514486	0.0951969	0.000801686
TCGA-CW-5587-01A-01R-1541-07	TCGA-CW-5587-01A	TCGA-CW-5587	62	FEMALE	G2	Stage III	T3b	M0	N0	C3	C3	low	0	2226	1	2003	-1.113	NA	6	3250.36	495.617	-1049.98	0.311298	22	26	0.951941	0.945159	1.28309	1.74198	51	0.239333	3	3	2	0	0	0	0.00186446	0	0	0.115694	0.229068	0	0.00743976	0.052188	0	0.0837267	0	0.00633026
TCGA-CW-5589-01A-01R-1541-07	TCGA-CW-5589-01A	TCGA-CW-5589	52	MALE	G2	Stage I	T1a	M0	NX	C3	C3	low	0	2378	0	2378	-1.2312	NA	NA	3774.88	216.829	-1216.34	0.167565	NA	NA	0.439313	0.990776	1.46739	0	83	0.0904556	NA	NA	NA	0	0.0431956	0.0119901	0.0102302	0	0.0358367	0.0171282	0.491283	0	0.0251477	0.0457287	0	0.0153663	0.0548867	0.0332745
TCGA-CW-6088-01A-11R-1672-07	TCGA-CW-6088-01A	TCGA-CW-6088	60	MALE	G2	Stage I	T1b	M0	N0	C3	C3	low	0	3222	0	3222	-1.2928	NA	3	2793.56	-363.217	-645.705	0.130841	NA	NA	NA	0.991837	1.20204	NA	53	0.0995867	2	2	11	0	0.0160895	0	0	0	0	0.0402874	0.43	0	0.101928	0.0820613	0.0187182	0	0.0697772	0.0127219
TCGA-CW-6090-01A-11R-1672-07	TCGA-CW-6090-01A	TCGA-CW-6090	68	MALE	G3	Stage I	T1b	M0	NX	C3	C3	low	0	2552	1	2780	-1.4184	0	11	2487.54	-216.64	-864.905	0.193586	41	49	0.765538	0.945327	1.70565	2.15859	79	0.8859	7	7	19	0	0.0615471	0.0208363	0	0	0	0.00312423	0.473078	0	0.060052	0.0649274	0.00235601	0.0288962	0	0.00697374
TCGA-CW-6093-01A-11R-1672-07	TCGA-CW-6093-01A	TCGA-CW-6093	73	MALE	G1	Stage I	T1a	M0	NX	C3	C3	low	0	3146	0	3146	-1.14	0.02	2	1459.14	285.73	-339.367	0.125863	37	30	NA	0.960964	0.802128	2.88511	72	0.0731144	2	2	2	0	0.0136894	0.00321323	0	0	0	0.0234795	0.254314	0	0.086663	0.31704	0	0.0163006	0.0954236	0.000847505
TCGA-CZ-4853-01A-01R-1426-07	TCGA-CZ-4853-01A	TCGA-CZ-4853	82	MALE	G2	Stage I	T1a	M0	NX	C3	C3	low	0	774	0	774	-1.3425	0	3	3713.32	-101.653	-1488.67	0.129103	29	57	0.963347	0.997798	1.1489	2.42216	76	0.115376	4	4	4	0	0.0318226	0.00358841	0	0	0	0.120305	0.331228	0	0.0510478	0.0253436	0	0.00938235	0.0183276	0.0204032
TCGA-CZ-4859-01A-02R-1426-07	TCGA-CZ-4859-01A	TCGA-CZ-4859	59	FEMALE	G2	Stage I	T1	M0	N0	C3	C3	low	0	1787	0	1787	-1.2868	0.11	4	3490.11	94.8385	-1760.95	0.0730992	46	131	NA	0.93606	1.12506	2.46399	79	0.198435	13	13	9	0	0.016223	0.0423282	0	0	0	0.0738002	0.223301	0	0.0376991	0.178166	0	0.051953	0.0382385	0.0178548
TCGA-CZ-4863-01A-01R-1503-07	TCGA-CZ-4863-01A	TCGA-CZ-4863	51	FEMALE	G3	Stage III	T3b	M0	N0	C3	C3	low	0	1928	0	1928	-0.7051	0.2	0	1673.11	435.346	-918.455	0.394866	19	172	NA	0.944867	1.2388	1.24765	43	0.0968306	3	3	3	0	0.00493408	0	0.0182504	0	0	0.0940181	0.0983608	0	0.0378833	0.0197478	0	0.0723363	0	0.0114959
TCGA-CZ-4864-01A-01R-1503-07	TCGA-CZ-4864-01A	TCGA-CZ-4864	86	MALE	G3	Stage II	T2	M0	N0	C3	C3	low	1	2830	0	2830	-1.0682	0.01	4	2466.35	158.284	-839.876	0.24955	24	18	0.842935	0.896667	1.37924	1.94645	60	0.184893	5	5	4	0.00963614	0	0	0	0	0	0.107717	0.247044	0	0.0253122	0.0278671	0.0110158	0.0556741	0	0.0180868
TCGA-CZ-4866-01A-01R-1503-07	TCGA-CZ-4866-01A	TCGA-CZ-4866	79	FEMALE	G3	Stage I	T1	M0	NX	C3	C3	low	0	3267	0	3267	-1.232	0.09	25	1640.54	-706.633	-1406.51	0.200053	32	61	0.962014	0.985588	1.57334	2.07835	58	0.690407	3	3	2	0	0.0113259	0	0	0	0.120558	0.0270132	0.50203	0	0.0211744	0.0648731	0.0194554	0.0229543	0	0.0345289
TCGA-CZ-5451-01A-01R-1503-07	TCGA-CZ-5451-01A	TCGA-CZ-5451	74	MALE	G3	Stage II	T2	M0	N0	C3	C3	low	0	1929	0	1929	-1.3002	0	4	3701.23	279.534	-1203.13	0.165024	43	58	NA	0.992454	0.990223	2.07665	45	0.129155	0	0	2	0	0.0087044	0	0	0	0	0.0696095	0.426944	0	0.0151632	0.0286331	0	0.0891708	0	0.00758868
TCGA-CZ-5452-01A-01R-1503-07	TCGA-CZ-5452-01A	TCGA-CZ-5452	69	MALE	G2	Stage II	T2	M0	N0	C3	C3	low	0	1789	0	1789	-1.2081	0.12	4	1935.63	267.163	-1303.36	0.54694	12	28	0.660638	0.954226	1.64156	0.827338	45	0.333491	4	4	7	0.00819487	0.0108091	0	0.00471259	0	0	0.0379548	0.132673	0.0190867	0	0.0258197	0.000672216	0.078937	0	0.0143328
TCGA-CZ-5453-01A-01R-1503-07	TCGA-CZ-5453-01A	TCGA-CZ-5453	67	MALE	G2	Stage II	T2	M0	NX	C3	C3	low	1	2419	0	2419	-1.3333	0.01	3	2470.36	443.256	-1397.29	0.0338279	35	31	NA	NA	0.808994	1.96537	71	0.131555	7	7	10	0	0.049056	0	0	0	0.0182014	0.0353654	0.554116	0.0368985	0	0.110437	0.00748319	0.0468977	0.0292915	0.0484261
TCGA-CZ-5454-01A-01R-1503-07	TCGA-CZ-5454-01A	TCGA-CZ-5454	63	MALE	G2	Stage IV	T2	M1	N0	C3	C4	low	1	722	1	423	-1.3998	0	4	3458.74	778.666	-1305.59	0.144335	11	5	NA	0.986757	1.11212	0.511605	75	0.139782	8	8	3	0	0.0104027	0.00772639	0.0188489	0.00467281	0.0423212	0.00331756	0.602048	0.0554917	0	0.016173	0.012284	0.00951133	0	0.00135588
TCGA-CZ-5457-01A-01R-1503-07	TCGA-CZ-5457-01A	TCGA-CZ-5457	62	MALE	G4	Stage III	T3a	M0	NX	C3	C3	low	0	2754	1	174	-1.4713	0.01	24	698.363	26.2482	-1060.83	0.183785	41	93	0.848906	0.943507	1.16378	1.86764	46	0.763888	1	1	4	0	0.0332021	0	0	0	0	0.0817893	0.479041	0	0.0299484	0.0261999	0.0166004	0.0261132	0	0.0462397
TCGA-CZ-5458-01A-01R-1503-07	TCGA-CZ-5458-01A	TCGA-CZ-5458	43	MALE	G3	Stage III	T3a	M0	NX	C3	C3	low	0	2789	0	2789	-1.1562	0	1	3071.05	844.456	-602.645	0.29364	13	0	NA	0.969266	1.57276	0.775673	53	0.143331	6	6	6	0	0.0200601	0.0263314	0	0	0	0.0426241	0.214921	0	0.0377329	0.105353	0.00451132	0.0617608	0	0.00752935
TCGA-CZ-5459-01A-01R-1503-07	TCGA-CZ-5459-01A	TCGA-CZ-5459	63	MALE	G3	Stage III	T3b	M0	NX	C3	C3	low	0	1683	0	1683	-0.6365	0	2	2922.85	745.943	-799.754	0.201652	37	230	0.93937	0.888719	1.48025	2.27708	39	0.06766	0	0	19	0	0.0155455	0	0	0	0.0129463	0.120988	0.270449	0	0.0391918	0.00366566	0.00299972	0.0355118	0	0.00980792
TCGA-CZ-5460-01A-01R-1503-07	TCGA-CZ-5460-01A	TCGA-CZ-5460	55	MALE	G2	Stage IV	T3b	M1	NX	C3	C3	low	0	2873	0	2873	-1.2079	0.27	2	2255.96	1020.1	-1590.61	0.257776	24	7	0.919456	0.913944	1.41725	1.40156	70	0.409412	5	5	5	0	0.042165	0.00683915	0	0	0	0.0464608	0.127948	0	0.0166983	0.0411274	0.00577554	0.0771804	0	0.0175249
TCGA-CZ-5462-01A-01R-1503-07	TCGA-CZ-5462-01A	TCGA-CZ-5462	83	MALE	G3	Stage IV	T1b	M1	NX	C3	C4	low	1	311	1	311	-1.6963	0	5	1177.82	652.479	-1632.27	0.460093	12	48	0.853546	0.992578	1.90159	1.77278	68	0.251548	15	15	11	0	0.0237124	0.0319402	0	0.000645029	0.00892072	0.0884929	0.149485	0.172456	0	0.171195	0.0388796	0.0709376	0	0.010056
TCGA-CZ-5463-01A-01R-1503-07	TCGA-CZ-5463-01A	TCGA-CZ-5463	76	MALE	G2	Stage II	T2	M0	NX	C3	C3	low	0	662	0	662	-1.1683	0	6	3087.3	206.321	-769.969	0.164774	27	84	NA	0.885767	1.05029	1.19811	43	0.20837	0	0	4	0.00710703	0	0	0	0	0	0.175542	0.359764	0	0.0127754	0.00727093	0.00204934	0.0454901	0	0.00588012
TCGA-CZ-5465-01A-01R-1503-07	TCGA-CZ-5465-01A	TCGA-CZ-5465	76	FEMALE	G2	Stage III	T3b	M0	NX	C3	C3	low	1	2564	0	2564	-1.3224	0.12	27	3337.26	-196.317	-1369.03	0.062275	50	122	0.913698	0.960422	1.91553	2.63733	55	0.752112	4	4	2	0	0.0352275	0	0	0	0	0.0781864	0.391462	0.056179	0	0.0441765	6.64e-05	0.0615214	0	0.0231315
TCGA-CZ-5467-01A-01R-1503-07	TCGA-CZ-5467-01A	TCGA-CZ-5467	86	FEMALE	G4	Stage III	T3a	M0	N0	C3	C3	low	1	73	1	62	-1.9159	0	4	1789.17	53.3882	-1290.83	0.104507	18	9	0.874495	0.979519	1.21101	1.37919	47	0.129674	10	10	6	0	0.0228454	0.00423189	0.00367534	0	0	0.159914	0.215474	0	0.0612823	0.0753246	0.00622075	0	0	0.0300091
TCGA-CZ-5982-01A-11R-1672-07	TCGA-CZ-5982-01A	TCGA-CZ-5982	59	FEMALE	G2	Stage I	T1a	M0	NX	C3	C3	low	0	2439	0	2439	-1.5905	0.09	2	1411.48	54.2814	-1116.26	0.133512	20	68	NA	0.980724	0.642144	1.10806	39	0.115398	4	4	2	0	0.00269518	0	0	0	0	0.0605323	0.298802	0	0.0986766	0.0929439	0.0326384	0.0177338	0.0147123	0.00688526
TCGA-CZ-5985-01A-11R-1672-07	TCGA-CZ-5985-01A	TCGA-CZ-5985	58	MALE	G2	Stage II	T2	M0	N0	C3	C3	low	0	1997	0	1997	-0.8929	0.02	5	3140.67	882.354	-1260.28	0.281096	18	100	0.708946	0.863545	1.51714	1.29206	71	0.22067	12	12	12	0	0.0496417	0	0.0012875	0	0.0719286	0.109077	0.394926	0	0.0115877	0.0278727	0.012162	0.011929	0	0.060479
TCGA-CZ-5986-01A-11R-1672-07	TCGA-CZ-5986-01A	TCGA-CZ-5986	61	MALE	G3	Stage I	T1	M0	N0	C3	C3	low	0	373	0	373	-1.0963	0.04	6	3418.04	-31.7314	-723.559	0.141525	15	46	NA	1	0.723943	1.27902	57	0.179382	0	0	2	0	0.0117453	0	0.0571168	0	0	0.133684	0.425678	0	0.0401051	0.0472534	0.00113536	0.0192911	0.0299362	0.0032534
TCGA-CZ-5988-01A-11R-1672-07	TCGA-CZ-5988-01A	TCGA-CZ-5988	38	MALE	G2	Stage I	T1b	M0	N0	C3	C3	low	0	693	0	693	-0.373	0	6	2328.27	793.494	-314.215	0.236411	19	1	NA	0.880451	1.16366	1.00072	69	0.147705	7	7	11	0	0.0530428	0	0	0	0.0180523	0.0934872	0.281708	0	0.0141958	0.0277709	0	0.0317339	0	0.00953188
TCGA-DV-5565-01A-01R-1541-07	TCGA-DV-5565-01A	TCGA-DV-5565	59	MALE	G2	Stage I	T1a	M0	NX	C3	C3	low	0	1329	0	1329	-1.8411	0	7	-532.668	-35.6498	-666.764	0.12414	28	75	NA	0.989297	0.767951	1.3425	58	0.187181	12	12	6	0.00130502	0	0.00863491	0	0	0.0348799	0.0569946	0.472235	0.000692916	0.0222874	0.116155	0	0.0289106	0.0118104	0.00992757
TCGA-DV-5566-01A-01R-1541-07	TCGA-DV-5566-01A	TCGA-DV-5566	67	FEMALE	G2	Stage I	T1a	M0	NX	C3	C3	low	0	1398	0	1398	-0.6133	0.06	3	1756.9	322.703	-796.596	0.206174	21	7	NA	1	1.94705	1.14427	37	0.0780144	3	3	5	0	0.0136477	0	0	0	0	0.0897787	0.444328	0.0443789	0	0.0499759	0.00443137	0.0508294	0	0.00803239
TCGA-DV-5567-01A-01R-1541-07	TCGA-DV-5567-01A	TCGA-DV-5567	40	FEMALE	G2	Stage I	T1a	M0	NX	C3	C3	low	0	2004	1	2004	-1.6351	0	0	3917.22	266.087	-1087.85	0.0355652	8	NA	NA	1	1.03974	NA	69	0.000286012	0	0	19	0.00654737	0.00789381	0	0	0	0.0141026	0.040407	0.300501	0	0.24662	0.0498186	0.000398901	0	0.0151916	0
TCGA-DV-5569-01A-01R-1541-07	TCGA-DV-5569-01A	TCGA-DV-5569	29	FEMALE	G2	Stage I	T1a	M0	NX	C3	C3	low	0	355	0	355	-0.8573	NA	0	1418.83	786.027	-794.109	0.184274	NA	NA	NA	0.9359	1.27206	0	51	0.0527932	4	4	7	0	0.0295257	0	0	0	0.0217765	0.0732634	0.384368	0	0.0221693	0.0397013	0.00805436	0.0438506	0	0.0134571
TCGA-DV-5575-01A-01R-1541-07	TCGA-DV-5575-01A	TCGA-DV-5575	52	FEMALE	G2	Stage I	T1a	M0	NX	C3	C3	low	0	1729	0	1729	-0.9338	NA	3	2027.04	770.145	-842.928	0.231926	NA	NA	0.891283	0.920131	1.35981	0	63	0.0946974	8	8	5	0	0.0197425	0	0.00974586	0	0.0135519	0.0662338	0.268373	0	0.0148093	0.0415041	0.00368565	0.0572025	0	0.0101548
TCGA-DV-A4W0-01A-11R-A266-07	TCGA-DV-A4W0-01A	TCGA-DV-A4W0	55	MALE	G3	Stage I	T1b	MX	NX	C3	C3	low	0	2470	1	2008	-0.9668	0.02	5	2100.12	518.595	-936.668	0.0284458	35	NA	NA	1	1.73797	0.763985	65	0.159281	8	8	25	0.00278145	0.0109897	0.0350128	0	0	0	0.0732194	0.547081	0	0.0266071	0.0159578	0	0	0.0423019	0.0390727
TCGA-EU-5904-01A-11R-1672-07	TCGA-EU-5904-01A	TCGA-EU-5904	47	FEMALE	G1	Stage I	T1	M0	NX	C3	C3	low	0	551	0	551	-1.7802	0	0	3094.56	1210.86	-1356.87	0.175262	19	1	NA	0.994251	0.849783	0.988676	53	0.0437823	5	5	3	0	0.0638651	0.0179405	0	0	0	0.0302973	0.219944	0.113735	0	0.0915356	0.00850705	0.0616323	0	0.0203775
TCGA-EU-5905-01A-11R-1672-07	TCGA-EU-5905-01A	TCGA-EU-5905	67	FEMALE	G3	Stage I	T1	M0	NX	C3	C3	high	0	119	0	119	-1.3285	0.3	21	999.124	261.181	-967.541	0.225437	16	13	NA	1	1.49367	1.51043	75	0.947721	3	3	8	0	0.0194945	0.00992575	0	0	0	0.0424964	0.422519	0	0.112945	0.0103378	0.0027253	0.0102182	0.0438075	0.00260947
TCGA-EU-5906-01A-11R-1672-07	TCGA-EU-5906-01A	TCGA-EU-5906	55	MALE	G2	Stage I	T1b	M0	NX	C3	C3	low	0	206	0	206	-0.9555	0	1	3015.02	447.183	-675.454	0.228665	33	25	NA	0.978932	1.30031	1.64668	55	0.0471687	4	4	19	0	0.017318	0	0	0	0.00386071	0.0458094	0.449882	0	0.0658035	0.0580505	0.0213124	0.00769702	0.0172107	0.00827123
TCGA-EU-5907-01A-11R-1672-07	TCGA-EU-5907-01A	TCGA-EU-5907	81	MALE	G3	Stage III	T3a	M0	NX	C3	C4	low	0	127	0	127	-1.3898	NA	7	3253.39	-59.0936	-884.25	0.0591827	20	53	NA	0.960964	1.69112	1.16609	91	0.927421	11	11	8	0	0	0.0311594	0	0	0	0.0588667	0.457108	0	0.0176644	0.0568331	0.0171667	0.0577708	0	0.0047348
TCGA-G6-A8L6-01A-11R-A37O-07	TCGA-G6-A8L6-01A	TCGA-G6-A8L6	55	MALE	G3	Stage IV	T2a	MX	NX	C3	C3	low	1	313	1	304	-1.7051	0.09	1	2427.18	289.438	-1675.03	0.190777	29	34	NA	0.98666	1.25929	1.4439	70	0.0912167	2	2	18	0	0.0175189	0	0	0	0	0.0330881	0.288014	0	0.0137551	0.20866	0	0.0423199	0	0.0504434
TCGA-G6-A8L8-01A-21R-A37O-07	TCGA-G6-A8L8-01A	TCGA-G6-A8L8	62	FEMALE	G3	Stage I	T1b	MX	NX	C3	C3	low	1	1091	0	1091	-1.8855	0.02	5	3010.62	-556.208	-2020.32	0.0668771	29	13	NA	1	1.16145	1.62152	143	0.900695	20	20	85	0.0452746	0	0.0175092	0	0	0	0.0234717	0.155234	0	0.0744914	0.0889696	0	0.102094	0.0465603	0.0099921
TCGA-GK-A6C7-01A-11R-A33J-07	TCGA-GK-A6C7-01A	TCGA-GK-A6C7	76	FEMALE	NA	Stage I	T1a	MX	NX	C3	C3	low	0	61	0	61	-1.2577	0	3	2215.99	433.33	-978.522	0.170194	47	128	NA	0.986926	1.09126	2.19867	63	0.129184	5	5	32	0	0	0	0	0	0	0.0871853	0.203632	0	0.0446827	0.140964	0	0.037867	0.0872999	0.0494486
TCGA-MM-A563-01A-11R-A266-07	TCGA-MM-A563-01A	TCGA-MM-A563	41	MALE	G2	NA	T3	MX	NX	C3	C3	low	0	591	0	591	-0.8579	0	6	971.953	475.044	-885.699	0.237995	24	121	0.840157	0.97994	1.48361	1.16951	97	0.885592	4	4	71	0	0.0393474	0	0.0129581	0	0.0234053	0.0814538	0.227151	0	0.0456408	0.076573	0	0.0462887	0	0.0925145
TCGA-MM-A564-01A-11R-A266-07	TCGA-MM-A564-01A	TCGA-MM-A564	68	MALE	G2	Stage II	T2a	MX	NX	C3	C3	low	0	607	0	607	-1.4372	0	9	1136.68	-818.642	-1252.31	0.0901757	29	149	NA	1	1.85613	2.03278	52	0.333998	5	5	19	0.036546	0	0.0193489	0	0	0.0146093	0.00466938	0.168739	0	0.105049	0.256544	0	0.129814	0.0854727	0.0112481
TCGA-MW-A4EC-01A-11R-A266-07	TCGA-MW-A4EC-01A	TCGA-MW-A4EC	72	FEMALE	G2	Stage I	T1a	MX	NX	C3	C3	low	0	498	0	498	-1.398	0	4	2055.76	337.507	-1412.85	0.142923	14	0	NA	1	1.01675	0.881972	103	0.140674	4	4	40	0.0411025	0	0	0.0166347	0	0.0206006	0.0381104	0.354619	0.00566047	0.0316701	0.0457095	0.0115864	0.0237522	0.0455037	0.0486171
[truncated: 13 more columns]

## Sheet: S2
Table-S2: Immunomodulators
Gene	HGNC Symbol	Friendly Name	Entrez ID	Gene Family	Super Category	Immune Checkpoint	Function
ADORA2A	ADORA2A	ADORA2A	135	Receptor	Receptor	Inhibitory
ARG1	ARG1	ARG1	383	Enzyme	Other	Inhibitory	Immune suppression
BTLA	BTLA	BTLA	151888	Immunoglobulin	Receptor	Inhibitory
BTN3A1	BTN3A1	BTN3A1	11119	Butyrophilins	Co-inhibitor	Stimulatory	Activation of γδ T cells
BTN3A2	BTN3A2	BTN3A2	11118	Butyrophilins	Co-inhibitor	Stimulatory	Higher expression leads to increased CD4+ infiltration
CCL5 (RANTES)	CCL5	RANTES	6352	Chemokine	Ligand	Stimulatory
CD27 (TNFRSF7)	CD27	CD27	939	TNFR	Receptor	Stimulatory
CD274 (PD-L1)	CD274	PD-L1	29126	B7/CD28	Co-inhibitor	Inhibitory
CD276 (B7-H3)	CD276	CD276	80381	B7/CD28	Co-inhibitor	Inhibitory
CD28	CD28	CD28	940	B7/CD28	Co-stimulator	Stimulatory
CD40	CD40	CD40	958	TNFR	Receptor	Stimulatory
CD40LG	CD40LG	CD40LG	959	TNF	Ligand	Stimulatory
CD70	CD70	CD70	970	TNF	Ligand	Stimulatory
CD80 (B7-1)	CD80	CD80	941	B7/CD28	Co-stimulator	Stimulatory	T cell activation
CTLA4	CTLA4	CTLA4	1493	Receptor	Receptor	Inhibitory
CX3CL1	CX3CL1	CX3CL1	6376	CXC chemokine	Ligand	Stimulatory
CXCL10 (IP-10)	CXCL10	IP-10	3627	CXC chemokine	Ligand	Stimulatory
CXCL9	CXCL9	CXCL9	4283	CXC chemokine	Ligand	Stimulatory
EDNRB	EDNRB	EDNRB	1910	Receptor	Receptor	Inhibitory	Suppress T cell adhesion and homing
ENTPD1	ENTPD1	ENTPD1	953	Ectonucleotidase	Other	Stimulatory	Immune suppression
GZMA	GZMA	GZMA	3001	Granzyme	Other	Stimulaotry	Granzyme
HAVCR2 (TIM-3)	HAVCR2	TIM-3	84868	Immunoglobulin	Receptor	Inhibitory
HLA-A	HLA-A	HLA-A	3105	MHC Class I	Antigen presentation		MHC Class I
HLA-B	HLA-B	HLA-B	3106	MHC Class I	Antigen presentation		MHC Class I
HLA-C	HLA-C	HLA-C	3107	MHC Class I	Antigen presentation		MHC Class I
HLA-DPA1	HLA-DPA1	HLA-DPA1	3113	MHC Class II	Antigen presentation		MHC Class II
HLA-DPB1	HLA-DPB1	HLA-DPB1	3115	MHC Class II	Antigen presentation		MHC Class II
HLA-DQA1	HLA-DQA1	HLA-DQA1	3117	MHC Class II	Antigen presentation		MHC Class II
HLA-DQA2	HLA-DQA2	HLA-DQA2	3118	MHC Class II	Antigen presentation		MHC Class II
HLA-DQB1	HLA-DQB1	HLA-DQB1	3119	MHC Class II	Antigen presentation		MHC Class II
HLA-DQB2	HLA-DQB2	HLA-DQB2	3120	MHC Class II	Antigen presentation		MHC Class II
HLA-DRA	HLA-DRA	HLA-DRA	3122	MHC Class II	Antigen presentation		MHC Class II
HLA-DRB1	HLA-DRB1	HLA-DRB1	3123	MHC Class II	Antigen presentation		MHC Class II
HLA-DRB3	HLA-DRB3	HLA-DRB3	3125	MHC Class II	Antigen presentation		MHC Class II
HLA-DRB4	HLA-DRB4	HLA-DRB4	3126	MHC Class II	Antigen presentation		MHC Class II
HLA-DRB5	HLA-DRB5	HLA-DRB5	3127	MHC Class II	Antigen presentation		MHC Class II
HMGB1	HMGB1	HMGB1	3146	HMG-box	Other	Stimulatory
ICAM1	ICAM1	ICAM1	3383		Cell adhesion	Stimulatory
ICOS	ICOS	ICOS	29851	B7/CD28	Receptor	Stimulatory
ICOSLG (B7-H2)	ICOSLG	ICOSLG	23308	Ligand	Co-stimulator	Stimulatory
IDO1	IDO1	IDO1	3620	Enzyme	Other	Inhibitory
IFNA1	IFNA1	IFNA1	3439	Cytokine	Ligand	Stimulatory
IFNA2	IFNA2	IFNA2	3440	Cytokine	Ligand	Stimulatory
IFNG	IFNG	IFNG	3458	Cytokine	Ligand	Stimulatory
IL10	IL10	IL10	3586	Cytokine	Ligand	Inhibitory	Anti-inflammatory cytokine
IL12	IL12A	IL12	3592	Cytokine	Ligand	Stumulatory
IL13	IL13	IL13	3596	Cytokine	Ligand	Inhibitory	Anti-inflammatory cytokine
IL1A	IL1A	IL1A	3552	Cytokine	Ligand	Stimulatory
IL1B	IL1B	IL1B	3553	Cytokine	Ligand	Stimulatory
IL2	IL2	IL2	3558	Cytokine	Ligand	Stimulatory
IL2RA (CD122)	IL2RA	IL2RA	3559	Type I cytokine receptor	Receptor	Stimulatory
IL4	IL4	IL4	3565	Cytokine	Ligand	Inhibitory	Differentiation of Th0 to Th2
ITGB2 (LFA1)	ITGB2	ITGB2	3689	Integrin	Cell adhesion	Stimulatory
KIR2DL1	KIR2DL1	KIR2DL1	3802	KIR	Receptor	Inhibitory
KIR2DL2	KIR2DL2	KIR2DL2	3803	KIR	Receptor	Inhibitory
KIR2DL3	KIR2DL3	KIR2DL3	3804	KIR	Receptor	Inhibitory
LAG3	LAG3	LAG3	3902	Immunoglobulin	Receptor	Inhibitory
MICA	MICA	MICA	100507436	MHC Class I	Antigen presentation		Immune suppression
MICB	MICB	MICB	4277	MHC Class I	Antigen presentation		Immune suppression
PDCD1 (PD-1)	PDCD1	PD-1	5133	B7/CD28	Receptor	Inhibitory
PDCD1LG2 (PD-L2, CD273, B7-DC)	PDCD1LG2	PD-L2	80380	B7/CD28	Co-inhibitor		Immune suppression
PRF1	PRF1	PRF1	5551	Pore	Other	Stimulatory	Allows infiltration by granzymes
SELP	SELP	SELP	6403	Selectin	Cell adhesion	Stimulatory
SLAMF7	SLAMF7	SLAMF7	57823	SLAM	Co-inhibitor	Inhibitory	Inhibitory
TGFB1	TGFB1	TGFB1	7040	Cytokine	Ligand	Inhibitory	Immune suppression
TIGIT	TIGIT	TIGIT	201633	PVR	Receptor	Inhibitory
TLR4	TLR4	TLR4	7099	Receptor	Receptor	Stimulatory
TNFA	TNF	TNF	7124	Cytokine	Ligand	Stimulatory
TNFRSF14 (HVEM)	TNFRSF14	HVEM	8764	TNFR	Receptor	Stimulatory
TNFRSF18 (CD357, GITR)	TNFRSF18	TNFRSF18	8784	TNFR	Receptor	Stimulatory
TNFRSF4 (CD134,OX40)	TNFRSF4	OX40	7293	TNFR	Receptor	Stimulatory
TNFRSF9 (CD137, 4-1BB)	TNFRSF9	4-1BB	3604	TNFR	Receptor	Stimulatory
TNFSF4 (OX40L)	TNFSF4	OX40L	7292	TNF	Ligand	Stimulatory
TNFSF9 (CD137L, 4-1BB-L)	TNFSF9	4-1BB-L	8744	TNF	Ligand	Stimulatory
VEGFA	VEGFA	VEGFA	7422	Growth factor	Ligand	Inhibitory	Immune suppressor
VEGFB	VEGFB	VEGFB	7423	Growth factor	Ligand	Inhibitory	Immune suppressor
VISTA (B7-H5)	C10orf54	VISTA	64115	Immunoglobulin	Co-inhibitor	Inhibitory
VTCN1 (B7-H4)	VTCN1	VTCN1	79679	B7/CD28	Co-inhibitor	Inhibitory

## Sheet: S3
Table-S3: Other relevant gene signatures (biological processes) enrolled in this study
Gene Signature	Platform	Genes	Source
CD8 T effector	Gene expression profiling	CD8A, CXCL10, CXCL9, GZMA, GZMB, IFNG, PRF1, TBX21	PMID: 26952546
Antigen processing machinery	Gene expression profiling	B2M, HLA-A, HLA-B, HLA-C, TAP1, TAP2	PMID: 27855702
Immune checkpoint	Gene expression profiling	CD274, CTLA4, HAVCR2, LAG3, PDCD1, PDCD1LG2, TIGIT
EMT1	Gene expression profiling	CLDN3, CLDN7, CLDN4, CDH1, VIM, TWIST1, ZEB1, ZEB2	PMID: 24520177
EMT2	Gene expression profiling	AXL, FAP, LOXL2, ROR2, TAGLN, TWIST2, WNT5A	PMID: 26997480
EMT3	Gene expression profiling	FOXF1, GATA6, SOX9, TWIST1, ZEB1, ZEB2	PMID: 27321955
Pan-F-TBRS	Gene expression profiling	ACTA2, ACTG2, ADAM12, ADAM19, CNN1, COL4A1, CTGF, CTPS1, FAM101B, FSTL3, HSPB1, IGFBP3, PXDC1, SEMA7A, SH3PXD2A, TAGLN, TGFBI, TNS1, TPM1	PMID: 29443960
Angiogenesis	Gene expression profiling	CDH5, SOX17, SOX18, TEK	PMID: 22553347
Fanconi anemia	Gene expression profiling	APITD1, ATR, ATRIP, BLM, BRCA1, BRCA2, BRIP1, C17orf70, C19orf40, EME1, EME2, ERCC1, ERCC4, FAN1, FANCA, FANCB, FANCC, FANCD2, FANCE, FANCF, FANCG, FANCI, FANCL, FANCM, HES1, MLH1, MUS81, PALB2, PMS2, POLH, POLI, POLK, POLN, RAD51, RAD51C, REV1, REV3L, RMI1, RMI2, RPA1, RPA2, RPA3, RPA4, SLX4, STRA13, TELO2, TOP3A, TOP3B, UBE2T, USP1, WDR48	KEGG hsa03460
Cell cycle	Gene expression profiling	ABL1, ANAPC1, ANAPC10, ANAPC11, ANAPC13, ANAPC2, ANAPC4, ANAPC5, ANAPC7, ATM, ATR, BUB1, BUB1B, BUB3, CCNA1, CCNA2, CCNB1, CCNB2, CCNB3, CCND1, CCND2, CCND3, CCNE1, CCNE2, CCNH, CDC14A, CDC14B, CDC16, CDC20, CDC23, CDC25A, CDC25B, CDC25C, CDC26, CDC27, CDC45, CDC6, CDC7, CDK1, CDK2, CDK4, CDK6, CDK7, CDKN1A, CDKN1B, CDKN1C, CDKN2A, CDKN2B, CDKN2C, CDKN2D, CHEK1, CHEK2, CREBBP, CUL1, DBF4, E2F1, E…	KEGG hsa4110
DNA replication	Gene expression profiling	DNA2, FEN1, LIG1, MCM2, MCM3, MCM4, MCM5, MCM6, MCM7, PCNA, POLA1, POLA2, POLD1, POLD2, POLD3, POLD4, POLE, POLE2, POLE3, POLE4, PRIM1, PRIM2, RFC1, RFC2, RFC3, RFC4, RFC5, RNASEH1, RNASEH2A, RNASEH2B, RNASEH2C, RPA1, RPA2, RPA3, RPA4, SSBP1	KEGG hsa3030
Nucleotide excision repair	Gene expression profiling	CCNH, CDK7, CETN2, CUL4A, CUL4B, DDB1, DDB2, ERCC1, ERCC2, ERCC3, ERCC4, ERCC5, ERCC6, ERCC8, GTF2H1, GTF2H2, GTF2H3, GTF2H4, GTF2H5, LIG1, MNAT1, PCNA, POLD1, POLD2, POLD3, POLD4, POLE, POLE2, POLE3, POLE4, RAD23A, RAD23B, RBX1, RFC1, RFC2, RFC3, RFC4, RFC5, RPA1, RPA2, RPA3, RPA4, XPA, XPC	KEGG hsa3420
DNA damage repair	Gene expression profiling	ALKBH2, ALKBH3, APEX1, APEX2, APLF, ATM, ATR, ATRIP, BLM, BRCA1, BRCA2, BRIP1, CCNH, CDK7, CETN2, CHAF1A, CHEK1, CHEK2, CLK2, DCLRE1C, DDB1, DDB2, DUT, ENDOV, ERCC1, ERCC2, ERCC3, ERCC4, ERCC5, ERCC6, ERCC8, FAN1, FANCA, FANCB, FANCC, FANCD2, FANCE, FANCF, FANCG, FANCL, FANCM, GTF2H1, GTF2H2, GTF2H3, GTF2H4, GTF2H5, H2AFX, HLTF, HUS1, LIG1, LIG3, LIG4, MBD4, MDC1, MGMT, MLH1, MLH3, MMS19, MNAT1, …	Wood lab
Homologous recombination	Gene expression profiling	BLM, BRCA2, EME1, MRE11A, MUS81, NBN, POLD1, POLD2, POLD3, POLD4, RAD50, RAD51, RAD51B, RAD51C, RAD51D, RAD52, RAD54B, RAD54L, RPA1, RPA2, RPA3, RPA4, SHFM1, SSBP1, TOP3A, TOP3B, XRCC2, XRCC3	KEGG hsa3440
Mismatch repair	Gene expression profiling	EXO1, LIG1, MLH1, MLH3, MSH2, MSH3, MSH6, PCNA, PMS2, POLD1, POLD2, POLD3, POLD4, RFC1, RFC2, RFC3, RFC4, RFC5, RPA1, RPA2, RPA3, RPA4, SSBP1	KEGG hsa3430
WNT target	Gene expression profiling	EFNB3, MYC, TCF12, VEGFA	PMID: 25970248
Cell cycle regulators	Gene expression and mutational profiling	ATM, CCND1, CCNE1, CDKN1A, CDKN2A, E2F3, FBXW7, MDM2, RB1, TP53	PMID: 24476821

## Sheet: S4
Table-S4: Clinical data of ccRCC patients treated with anti-PD-1 therapy
RNA_ID	Cohort	Treatment	Sex	Age	Received_Prior_Therapy	Number_of_Prior_Therapies	SampleType	Tumor_Sample_Primary_or_Metastasis	Site_of_Metastasis	ORR	Benefit	ExtremeResponder	PFS	PFS_CNSR	OS	OS_CNSR
G138701_RCCBMS-00020-T_v1_RNA_OnPrem	CM-010	NIVOLUMAB	Male	62	Yes	2	FFPE	PRIMARY	NA	SD	CB	NEITHER	12.1644	1	25.3479	1
G138701_RCCBMS-00097-T_v1_RNA_OnPrem	CM-010	NIVOLUMAB	Female	67	Yes	2	FFPE	PRIMARY	NA	PR	CB	NEITHER	5.49041	1	36.526	1
G138701_RCCBMS-00141-T_v1_RNA_OnPrem	CM-010	NIVOLUMAB	Female	62	Yes	1	FFPE	PRIMARY	NA	PR	CB	ER	61.9068	0	68.5479	0
G138701_RCCBMS-00099-T_v1_RNA_OnPrem	CM-010	NIVOLUMAB	Male	60	Yes	3	FFPE	PRIMARY	NA	PD	NCB	PD	1.24932	1	1.47945	1
G138701_RCCBMS-00163-T_v1_RNA_OnPrem	CM-010	NIVOLUMAB	Male	76	Yes	2	FFPE	PRIMARY	NA	SD	ICB	NEITHER	5.65479	1	63.9781	0
G138701_RCCBMS-00053-T_v1_RNA_OnPrem	CM-010	NIVOLUMAB	Female	46	Yes	3	FFPE	PRIMARY	NA	SD	CB	NEITHER	15.4192	1	72.1315	0
G138701_RCCBMS-00116-T_v1_RNA_OnPrem	CM-010	NIVOLUMAB	Male	60	Yes	2	FFPE	PRIMARY	NA	PD	NCB	PD	1.21644	1	5.95068	1
G138701_RCCBMS-00136-T_v1_RNA_OnPrem	CM-010	NIVOLUMAB	Male	64	Yes	2	FFPE	PRIMARY	NA	SD	ICB	NEITHER	2.86027	1	35.5726	1
G138701_RCCBMS-00057-T_v1_RNA_OnPrem	CM-010	NIVOLUMAB	Male	59	Yes	2	FFPE	PRIMARY	NA	SD	ICB	NEITHER	7.00274	1	39.0904	1
G109543_RCCBMS-00007-T_v1_RNA_OnPrem	CM-010	NIVOLUMAB	Male	72	Yes	3	FFPE	PRIMARY	NA	PR	CB	NEITHER	33.337	1	73.1507	0
G138701_RCCBMS-00008-T_v1_RNA_OnPrem	CM-010	NIVOLUMAB	Female	63	Yes	1	FFPE	PRIMARY	NA	PD	NCB	PD	0.953425	1	1.18356	1
G138701_RCCBMS-00065-T_v1_RNA_OnPrem	CM-010	NIVOLUMAB	Female	63	Yes	1	FFPE	PRIMARY	NA	PD	NCB	PD	1.38082	1	13.0521	1
G138701_RCCBMS-00110-T_v1_RNA_OnPrem	CM-010	NIVOLUMAB	Female	64	Yes	3	FFPE	PRIMARY	NA	SD	ICB	NEITHER	2.10411	1	9.43562	1
G138701_RCCBMS-00111-T_v1_RNA_OnPrem	CM-010	NIVOLUMAB	Male	81	Yes	2	FFPE	PRIMARY	NA	PD	NCB	PD	1.4137	1	4.04384	1
G109543_RCCBMS-00147-T_v1_RNA_OnPrem	CM-010	NIVOLUMAB	Male	57	Yes	3	FFPE	PRIMARY	NA	PD	NCB	PD	1.9726	1	1.9726	1
G138701_RCCBMS-00044-T_v1_RNA_OnPrem	CM-010	NIVOLUMAB	Female	56	Yes	3	FFPE	PRIMARY	NA	PD	NCB	PD	1.64384	1	4.53699	1
G138701_RCCBMS-00084-T_v1_RNA_OnPrem	CM-010	NIVOLUMAB	Female	60	Yes	2	FFPE	PRIMARY	NA	PD	NCB	PD	1.38082	1	56.7123	1
G138701_RCCBMS-00093-T_v1_RNA_OnPrem	CM-010	NIVOLUMAB	Male	46	Yes	3	FFPE	PRIMARY	NA	PD	NCB	PD	1.31507	1	5.12877	1
G138701_RCCBMS-00154-T_v1_RNA_OnPrem	CM-010	NIVOLUMAB	Male	66	Yes	2	FFPE	PRIMARY	NA	PR	CB	NEITHER	27.8795	1	46.2575	1
G138701_RCCBMS-00194-T_v1_RNA_OnPrem	CM-010	NIVOLUMAB	Male	50	Yes	3	FFPE	PRIMARY	NA	PD	NCB	PD	1.31507	1	7.98904	1
G138701_RCCBMS-00028-T_v1_RNA_OnPrem	CM-010	NIVOLUMAB	Female	51	Yes	2	FFPE	PRIMARY	NA	CR	CB	NEITHER	10.8493	1	18.5753	1
G138701_RCCBMS-00047-T_v1_RNA_OnPrem	CM-010	NIVOLUMAB	Male	81	Yes	1	FFPE	PRIMARY	NA	SD	ICB	NEITHER	4.17534	1	64.9644	1
G138701_RCCBMS-00178-T_v1_RNA_OnPrem	CM-010	NIVOLUMAB	Male	55	Yes	3	FFPE	PRIMARY	NA	PR	CB	NEITHER	5.52329	1	8.21918	1
G138701_RCCBMS-00068-T_v1_RNA_OnPrem	CM-010	NIVOLUMAB	Female	60	Yes	2	FFPE	PRIMARY	NA	PD	NCB	PD	2.20274	1	4.17534	1
G138701_RCCBMS-00072-T_v1_RNA_OnPrem	CM-010	NIVOLUMAB	Male	76	Yes	2	FFPE	PRIMARY	NA	PR	CB	ER	39.1562	0	60.7233	0
G138701_RCCBMS-00035-T_v1_RNA_OnPrem	CM-010	NIVOLUMAB	Male	67	Yes	2	FFPE	PRIMARY	NA	PD	NCB	PD	1.18356	1	2.9589	1
G109543_RCCBMS-00114-T_v1_RNA_OnPrem	CM-010	NIVOLUMAB	Male	61	Yes	1	FFPE	PRIMARY	NA	SD	CB	NEITHER	7.10137	1	15.8795	1
G138701_RCCBMS-00125-T_v1_RNA_OnPrem	CM-010	NIVOLUMAB	Female	59	Yes	1	FFPE	PRIMARY	NA	PD	NCB	PD	2.63014	1	69.9945	0
G138701_RCCBMS-00165-T_v1_RNA_OnPrem	CM-010	NIVOLUMAB	Male	63	Yes	1	FFPE	PRIMARY	NA	PD	NCB	PD	1.4137	1	50.3671	1
G138701_RCCBMS-00092-T_v1_RNA_OnPrem	CM-010	NIVOLUMAB	Male	50	Yes	1	FFPE	PRIMARY	NA	PD	NCB	PD	1.4137	1	25.3151	1
G138701_RCCBMS-00036-T_v1_RNA_OnPrem	CM-010	NIVOLUMAB	Male	46	Yes	2	FFPE	PRIMARY	NA	PD	NCB	PD	0.526027	1	13.3808	1
G138701_RCCBMS-00011-T_v1_RNA_OnPrem	CM-010	NIVOLUMAB	Female	51	Yes	2	FFPE	PRIMARY	NA	SD	CB	NEITHER	8.54795	1	68.9096	0
G109543_RCCBMS-00145-T_v1_RNA_OnPrem	CM-010	NIVOLUMAB	Male	54	Yes	3	FFPE	PRIMARY	NA	PD	NCB	PD	1.4137	1	25.2493	1
G109543_RCCBMS-00196-T_v1_RNA_OnPrem	CM-010	NIVOLUMAB	Female	55	Yes	3	FFPE	PRIMARY	NA	PD	NCB	PD	1.34795	1	50.663	1
G138701_RCCBMS-00090-T_v1_RNA_OnPrem	CM-010	NIVOLUMAB	Male	50	Yes	1	FFPE	PRIMARY	NA	SD	ICB	NEITHER	2.99178	1	22.7178	1
G138701_RCCBMS-00113-T_v1_RNA_OnPrem	CM-010	NIVOLUMAB	Male	74	Yes	2	FFPE	PRIMARY	NA	SD	CB	NEITHER	11.0137	1	68.9425	0
G109543_RCCBMS-00076-T2_v1_RNA_OnPrem	CM-010	NIVOLUMAB	Male	54	Yes	2	FFPE	PRIMARY	NA	PR	CB	NEITHER	6.04932	0	28.2082	1
G138701_RCCBMS-00098-T_v1_RNA_OnPrem	CM-010	NIVOLUMAB	Female	69	Yes	2	FFPE	PRIMARY	NA	PR	CB	ER	39.1562	1	39.1562	1
G138701_RCCBMS-00103-T_v1_RNA_OnPrem	CM-010	NIVOLUMAB	Male	63	Yes	2	FFPE	PRIMARY	NA	SD	CB	NEITHER	8.05479	1	13.2164	0
G138701_RCCBMS-00137-T_v1_RNA_OnPrem	CM-010	NIVOLUMAB	Male	60	Yes	2	FFPE	PRIMARY	NA	PR	CB	NEITHER	9.92877	1	22.8493	1
G109543_RCCBMS-00150-T_v1_RNA_OnPrem	CM-010	NIVOLUMAB	Male	74	Yes	2	FFPE	PRIMARY	NA	PD	NCB	PD	1.44658	1	7.95616	1
G138701_RCCBMS-00191-T_v1_RNA_OnPrem	CM-010	NIVOLUMAB	Male	58	Yes	3	FFPE	PRIMARY	NA	PD	NCB	PD	1.34795	1	6.93699	1
G138701_RCCBMS-00169-T_v1_RNA_OnPrem	CM-010	NIVOLUMAB	Female	70	Yes	1	FFPE	PRIMARY	NA	PR	CB	NEITHER	25.1178	1	61.8411	0
G138701_RCCBMS-00049-T_v1_RNA_OnPrem	CM-010	NIVOLUMAB	Male	77	Yes	2	FFPE	PRIMARY	NA	SD	ICB	NEITHER	4.10959	1	5.2274	1
G138701_RCCBMS-00025-T_v1_RNA_OnPrem	CM-010	NIVOLUMAB	Male	69	Yes	1	FFPE	PRIMARY	NA	SD	ICB	NEITHER	0.0328767	0	31.2658	1
EA639146	CM-025	NIVOLUMAB	F	78	Yes	1	FFPE	PRIMARY	NA	NE	ICB	NEITHER	0.722793	1	5.65092	1
P66425-02F-Run1_S7_L001	CM-025	NIVOLUMAB	F	37	Yes	1	FFPE	PRIMARY	NA	PD	NCB	PD	0.985626	1	10.8747	1
P66291-09A-Run1_S10_L001	CM-025	NIVOLUMAB	M	45	Yes	1	FFPE	PRIMARY	NA	SD	ICB	NEITHER	3.84394	1	29.8645	1
P66425-08F-Run1_S7_L001	CM-025	NIVOLUMAB	M	62	Yes	1	FFPE	PRIMARY	NA	CRPR	CB	NEITHER	15.6386	1	50.037	1
P66511-05E-Run1_S11_L001	CM-025	NIVOLUMAB	M	65	Yes	1	FFPE	PRIMARY	NA	PD	NCB	PD	1.18275	1	2.13552	1
EA632171	CM-025	NIVOLUMAB	M	73	Yes	1	FFPE	METASTASIS	VISCERAL LUNG	SD	ICB	NEITHER	3.05544	1	63.4086	0
P66425-10A-Run1_S13_L002	CM-025	NIVOLUMAB	M	56	Yes	1	FFPE	PRIMARY	NA	SD	ICB	NEITHER	5.35524	1	11.729	1
P66287-07B-Run1_S2_L001	CM-025	NIVOLUMAB	F	70	Yes	1	FFPE	PRIMARY	NA	CRPR	CB	ER	57.5606	0	59.9261	0
P66287-09H-Run1_S14_L001	CM-025	NIVOLUMAB	M	53	Yes	1	FFPE	PRIMARY	NA	PD	NCB	PD	1.83984	1	17.577	1
P66507-10D-Run1_S4_L001	CM-025	NIVOLUMAB	M	59	Yes	1	FFPE	METASTASIS	VISCERAL OTHER	SD	CB	NEITHER	9.26489	1	38.5708	1
P66291-12D-Run1_S29_L002	CM-025	NIVOLUMAB	M	64	Yes	2	FFPE	PRIMARY	NA	SD	ICB	NEITHER	3.58111	1	57.0021	0
P66507-09C-Run1_S26_L002	CM-025	NIVOLUMAB	M	NA	Yes	1	FFPE	METASTASIS	VISCERAL LUNG	SD	ICB	NEITHER	4.96099	1	6.6037	1
P66451-09H-Run1_S2_L001	CM-025	NIVOLUMAB	M	64	Yes	1	FFPE	PRIMARY	NA	SD	ICB	NEITHER	5.32238	1	19.7782	1
EA647814	CM-025	NIVOLUMAB	M	67	Yes	2	FFPE	METASTASIS	VISCERAL LUNG	SD	CB	NEITHER	11.1376	1	57.0021	1
EA595647	CM-025	NIVOLUMAB	M	61	Yes	1	FFPE	PRIMARY	NA	CRPR	CB	NEITHER	29.0103	1	31.8357	1
P66432-08G-Run1_S26_L002	CM-025	NIVOLUMAB	M	75	Yes	2	FFPE	PRIMARY	NA	PD	NCB	PD	1.80698	1	47.2115	0
P66451-06C-Run1_S12_L001	CM-025	NIVOLUMAB	M	60	Yes	2	FFPE	METASTASIS	VISCERAL OTHER	SD	CB	NEITHER	7.29363	1	28.2546	1
P66287-11C-Run1_S22_L002	CM-025	NIVOLUMAB	M	73	Yes	2	FFPE	PRIMARY	NA	SD	ICB	NEITHER	1.90554	0	16.7228	1
P66282-01G-Run1_S3_L001	CM-025	NIVOLUMAB	M	69	Yes	2	FFPE	PRIMARY	NA	CRPR	CB	ER	54.9979	0	57.7577	0
P66425-06E-Run1_S28_L002	CM-025	NIVOLUMAB	M	60	Yes	1	FFPE	PRIMARY	NA	SD	ICB	NEITHER	5.71663	1	9.06776	1
P66511-10D-Run1_S3_L001	CM-025	NIVOLUMAB	M	64	Yes	1	FFPE	METASTASIS	OTHER	PD	NCB	PD	1.54415	1	56.3121	0
P66511-06G-Run1_S16_L001	CM-025	NIVOLUMAB	M	85	Yes	1	FFPE	PRIMARY	NA	SD	ICB	NEITHER	9.23203	1	20.3696	1
EA632688	CM-025	NIVOLUMAB	M	62	Yes	1	FFPE	PRIMARY	NA	CRPR	CB	NEITHER	6.50513	1	59.4333	0
P66425-07C-Run1_S2_L001	CM-025	NIVOLUMAB	M	57	Yes	1	FFPE	PRIMARY	NA	SD	CB	NEITHER	7.19507	1	22.4394	1
P66425-06G-Run1_S30_L002	CM-025	NIVOLUMAB	M	53	Yes	1	FFPE	PRIMARY	NA	CRPR	CB	NEITHER	10.9405	1	22.8665	1
EA647820	CM-025	NIVOLUMAB	M	67	Yes	2	FFPE	PRIMARY	NA	SD	ICB	NEITHER	5.35524	1	36.2053	1
EA595632	CM-025	NIVOLUMAB	M	71	Yes	1	FFPE	METASTASIS	OTHER	NE	ICB	NEITHER	0.0657084	1	0.295688	1
P66511-09B-Run1_S26_L002	CM-025	NIVOLUMAB	M	53	Yes	2	FFPE	PRIMARY	NA	SD	ICB	NEITHER	5.51951	1	55.885	0
P66282-10E-Run1_S12_L002	CM-025	NIVOLUMAB	F	62	Yes	1	FFPE	PRIMARY	NA	SD	ICB	NEITHER	11.4004	1	35.1211	1
P66432-07E-Run1_S20_L002	CM-025	NIVOLUMAB	M	66	Yes	1	FFPE	PRIMARY	NA	NE	ICB	NEITHER	0.0328542	0	5.0924	1
EA639153	CM-025	NIVOLUMAB	M	53	Yes	2	FFPE	PRIMARY	NA	SD	ICB	NEITHER	4.73101	1	51.1869	0
EA632174	CM-025	NIVOLUMAB	M	40	Yes	3	FFPE	METASTASIS	VISCERAL LUNG	CRPR	CB	ER	38.6694	1	62.6201	0
P66287-06H-Run1_S30_L002	CM-025	NIVOLUMAB	M	70	Yes	1	FFPE	PRIMARY	NA	CRPR	CB	NEITHER	5.55236	0	12.9446	1
P66451-08H-Run1_S26_L002	CM-025	NIVOLUMAB	M	62	Yes	3	FFPE	METASTASIS	VISCERAL LUNG	NE	ICB	NEITHER	0.0328542	0	0.952772	0
EA632758	CM-025	NIVOLUMAB	M	79	Yes	1	FFPE	PRIMARY	NA	NE	ICB	NEITHER	0.459959	1	0.821355	1
EA632149	CM-025	NIVOLUMAB	F	75	Yes	2	FFPE	METASTASIS	VISCERAL OTHER	SD	ICB	NEITHER	14.883	1	63.2115	0
P66507-04A-Run1_S1_L001	CM-025	NIVOLUMAB	F	71	Yes	1	FFPE	PRIMARY	NA	SD	ICB	NEITHER	7.3922	1	65.807	0
P66282-05D-Run1_S21_L002	CM-025	NIVOLUMAB	M	31	Yes	1	FFPE	PRIMARY	NA	PD	NCB	PD	1.77413	1	21.9138	1
P66451-05D-Run1_S8_L001	CM-025	NIVOLUMAB	M	70	Yes	1	FFPE	METASTASIS	OTHER	PD	NCB	PD	1.83984	1	30.0616	1
P66287-04D-Run1_S18_L002	CM-025	NIVOLUMAB	M	38	Yes	1	FFPE	METASTASIS	OTHER	PD	NCB	PD	1.74127	1	40.0164	1
P66291-05G-Run1_S22_L002	CM-025	NIVOLUMAB	M	45	Yes	1	FFPE	METASTASIS	VISCERAL OTHER	PD	NCB	PD	1.80698	1	31.1786	1
P66291-01B-Run1_S2_L001	CM-025	NIVOLUMAB	F	88	Yes	1	FFPE	PRIMARY	NA	CRPR	CB	ER	61.6674	0	63.2772	0
P66287-03A-Run1_S9_L001	CM-025	NIVOLUMAB	M	43	Yes	2	FFPE	PRIMARY	NA	PD	NCB	PD	1.80698	1	5.25667	1
EA632123	CM-025	NIVOLUMAB	M	64	Yes	2	FFPE	PRIMARY	NA	PD	NCB	PD	1.83984	1	12.7474	1
P66507-02D-Run1_S25_L002	CM-025	NIVOLUMAB	M	83	Yes	1	FFPE	PRIMARY	NA	SD	CB	NEITHER	37.7166	1	47.7043	1
EA595720	CM-025	NIVOLUMAB	M	48	Yes	1	FFPE	PRIMARY	NA	SD	CB	NEITHER	16.1643	1	36.961	1
P66507-08D-Run1_S20_L002	CM-025	NIVOLUMAB	M	54	Yes	2	FFPE	PRIMARY	NA	PD	NCB	PD	1.90554	1	9.72485	1
P66507-12B-Run1_S13_L001	CM-025	NIVOLUMAB	M	55	Yes	1	FFPE	METASTASIS	VISCERAL LUNG	PD	NCB	PD	1.9384	1	50.8583	0
P66507-01E-Run1_S19_L002	CM-025	NIVOLUMAB	F	52	Yes	1	FFPE	PRIMARY	NA	CRPR	CB	ER	37.7495	0	40.3121	0
EA595719	CM-025	NIVOLUMAB	F	64	Yes	1	FFPE	PRIMARY	NA	SD	ICB	NEITHER	7.16222	1	53.2238	0
P66432-04D-Run1_S2_L001	CM-025	NIVOLUMAB	F	66	Yes	3	FFPE	PRIMARY	NA	PD	NCB	PD	1.9384	1	43.3347	1
P66507-07F-Run1_S16_L002	CM-025	NIVOLUMAB	M	82	Yes	1	FFPE	PRIMARY	NA	PD	NCB	PD	1.47844	1	1.77413	1
EA632813	CM-025	NIVOLUMAB	F	60	Yes	1	FFPE	PRIMARY	NA	SD	ICB	NEITHER	5.84805	1	13.963	1
EA632133	CM-025	NIVOLUMAB	M	77	Yes	2	FFPE	METASTASIS	OTHER	CRPR	CB	NEITHER	13.1745	1	13.1745	1
P66432-11C-Run1_S7_L001	CM-025	NIVOLUMAB	M	46	Yes	1	FFPE	NA	NA	PD	NCB	PD	1.74127	1	12.4846	0
P66432-02C-Run1_S22_L002	CM-025	NIVOLUMAB	M	69	Yes	1	FFPE	METASTASIS	NA	SD	ICB	NEITHER	3.84394	1	12.2546	1
EA639099	CM-025	NIVOLUMAB	M	58	Yes	1	FFPE	METASTASIS	OTHER	CRPR	CB	NEITHER	7.16222	1	22.1109	1
P66287-04G-Run1_S20_L002	CM-025	NIVOLUMAB	M	44	Yes	1	FFPE	PRIMARY	NA	SD	ICB	NEITHER	9.23203	1	27.6961	1
P66432-06D-Run1_S11_L001	CM-025	NIVOLUMAB	M	56	Yes	3	FFPE	METASTASIS	VISCERAL LUNG	PD	NCB	PD	0.985626	1	12.0903	1
P66425-02C-Run1_S5_L001	CM-025	NIVOLUMAB	M	58	Yes	3	FFPE	METASTASIS	VISCERAL OTHER	SD	ICB	NEITHER	7.35934	1	34.5298	1
P66451-01E-Run1_S17_L002	CM-025	NIVOLUMAB	M	51	Yes	2	FFPE	PRIMARY	NA	PD	NCB	PD	1.77413	1	59.9261	0
P66291-06C-Run1_S26_L002	CM-025	NIVOLUMAB	M	85	Yes	2	FFPE	METASTASIS	VISCERAL LUNG	NE	ICB	NEITHER	0.0328542	0	10.2177	1
P66432-10G-Run1_S4_L001	CM-025	NIVOLUMAB	M	52	Yes	1	FFPE	PRIMARY	NA	PD	ICB	PD	29.2731	1	58.9076	0
P66425-02E-Run1_S6_L001	CM-025	NIVOLUMAB	M	51	Yes	1	FFPE	PRIMARY	NA	PD	NCB	PD	2.00411	1	10.6448	1
P66507-03H-Run1_S30_L002	CM-025	NIVOLUMAB	M	56	Yes	3	FFPE	METASTASIS	SKIN/SOFT TISSUE	PD	NCB	PD	1.70842	1	31.3429	1
EA639120	CM-025	NIVOLUMAB	M	50	Yes	1	FFPE	PRIMARY	NA	SD	ICB	NEITHER	7.42505	1	14.3901	1
P66511-10G-Run1_S4_L001	CM-025	NIVOLUMAB	M	74	Yes	1	FFPE	METASTASIS	OTHER	PD	NCB	PD	1.51129	1	8.70637	1
EA639131	CM-025	NIVOLUMAB	M	70	Yes	1	FFPE	METASTASIS	OTHER	SD	ICB	NEITHER	3.77823	1	53.1253	0
P66451-04F-Run1_S6_L001	CM-025	NIVOLUMAB	F	63	Yes	1	FFPE	PRIMARY	NA	PD	NCB	PD	1.74127	1	22.2094	1
P66451-08G-Run1_S25_L002	CM-025	NIVOLUMAB	M	68	Yes	1	FFPE	PRIMARY	NA	SD	CB	NEITHER	7.3922	1	14.423	1
P66432-07D-Run1_S19_L002	CM-025	NIVOLUMAB	M	80	Yes	1	FFPE	PRIMARY	NA	PD	NCB	PD	1.9384	1	38.8008	1
EA595529	CM-025	NIVOLUMAB	F	30	Yes	1	FFPE	PRIMARY	NA	NE	ICB	NEITHER	0.0328542	0	20.6982	1
EA595597	CM-025	NIVOLUMAB	F	64	Yes	1	FFPE	METASTASIS	OTHER	CRPR	CB	ER	53.7166	0	57.3963	0
P66291-10G-Run1_S20_L002	CM-025	NIVOLUMAB	M	56	Yes	1	FFPE	PRIMARY	NA	SD	ICB	NEITHER	15.4743	1	62.4887	0
P66507-02B-Run1_S23_L002	CM-025	NIVOLUMAB	M	49	Yes	1	FFPE	PRIMARY	NA	PD	NCB	PD	1.37988	1	1.577	1
EA647824	CM-025	NIVOLUMAB	M	71	Yes	2	FFPE	PRIMARY	NA	SD	ICB	NEITHER	3.71253	0	7.49076	1
P66511-01E-Run1_S17_L002	CM-025	NIVOLUMAB	M	59	Yes	1	FFPE	PRIMARY	NA	SD	ICB	NEITHER	5.84805	1	23.3593	1
EA632768	CM-025	NIVOLUMAB	F	53	Yes	1	FFPE	PRIMARY	NA	NE	ICB	NEITHER	1.21561	1	10.152	1
EA639107	CM-025	NIVOLUMAB	M	67	Yes	1	FFPE	METASTASIS	NA	SD	CB	NEITHER	9.16632	1	22.0123	0
EA639109	CM-025	NIVOLUMAB	F	54	Yes	2	FFPE	PRIMARY	NA	CRPR	CB	NEITHER	23.9836	1	53.5195	0
EA595500	CM-025	NIVOLUMAB	M	61	Yes	1	FFPE	PRIMARY	NA	PD	NCB	PD	2.13552	1	3.54825	1
P66425-10B-Run1_S14_L001	CM-025	NIVOLUMAB	M	64	Yes	1	FFPE	METASTASIS	OTHER	NE	ICB	NEITHER	0.0328542	0	10.4805	1
P66425-03D-Run1_S11_L001	CM-025	NIVOLUMAB	M	62	Yes	3	FFPE	PRIMARY	NA	PD	NCB	PD	2.06982	1	56.5421	1
EA632802	CM-025	NIVOLUMAB	M	75	Yes	1	FFPE	PRIMARY	NA	PD	ICB	PD	9.95483	1	41.5277	1
P66451-05G-Run1_S9_L001	CM-025	NIVOLUMAB	F	39	Yes	2	FFPE	METASTASIS	OTHER	PD	NCB	PD	2.03696	1	13.3388	1
P66291-07E-Run1_S3_L001	CM-025	NIVOLUMAB	M	40	Yes	2	FFPE	PRIMARY	NA	PD	NCB	PD	1.83984	1	4.73101	1
P66291-07H-Run1_S5_L001	CM-025	NIVOLUMAB	M	37	Yes	1	FFPE	PRIMARY	NA	CRPR	CB	NEITHER	9.56057	1	55.6879	0
P66291-11F-Run1_S24_L002	CM-025	NIVOLUMAB	M	66	Yes	1	FFPE	PRIMARY	NA	PD	NCB	PD	1.87269	1	13.4374	1
P66425-06F-Run1_S29_L002	CM-025	NIVOLUMAB	F	83	Yes	1	FFPE	PRIMARY	NA	SD	CB	NEITHER	11.3018	1	60.0246	0
P66432-02B-Run1_S21_L002	CM-025	NIVOLUMAB	F	45	Yes	2	FFPE	PRIMARY	NA	SD	ICB	NEITHER	20.3039	1	59.8275	0
P66282-05G-Run1_S23_L002	CM-025	NIVOLUMAB	F	54	Yes	2	FFPE	PRIMARY	NA	SD	ICB	NEITHER	5.0924	1	18.1355	1
P66282-01B-Run1_S1_L001	CM-025	NIVOLUMAB	M	71	Yes	1	FFPE	PRIMARY	NA	CRPR	CB	ER	42.3819	1	42.3819	1
EA595522	CM-025	NIVOLUMAB	M	59	Yes	1	FFPE	PRIMARY	NA	SD	ICB	NEITHER	3.18686	1	19.6468	1
P66291-08G-Run1_S8_L001	CM-025	NIVOLUMAB	M	60	Yes	1	FFPE	PRIMARY	NA	SD	ICB	NEITHER	3.71253	1	11.2361	1
EA639018	CM-025	NIVOLUMAB	M	68	Yes	1	FFPE	PRIMARY	NA	SD	ICB	NEITHER	5.42094	1	17.0513	1
P66287-05E-Run1_S24_L002	CM-025	NIVOLUMAB	M	65	Yes	1	FFPE	PRIMARY	NA	SD	ICB	NEITHER	21.8809	1	60.6489	0
P66291-07B-Run1_S17_L002	CM-025	NIVOLUMAB	M	36	Yes	1	FFPE	PRIMARY	NA	PD	NCB	PD	1.67556	1	15.1129	1
P66287-09C-Run1_S12_L001	CM-025	NIVOLUMAB	M	75	Yes	2	FFPE	PRIMARY	NA	CRPR	CB	NEITHER	7.65503	1	44.5832	1
EA595635	CM-025	NIVOLUMAB	M	65	Yes	1	FFPE	PRIMARY	NA	PD	NCB	PD	1.01848	1	3.67967	1
EA595654	CM-025	NIVOLUMAB	M	70	Yes	1	FFPE	PRIMARY	NA	CRPR	CB	NEITHER	11.269	1	58.5791	0
P66282-04A-Run1_S14_L002	CM-025	NIVOLUMAB	F	48	Yes	2	FFPE	PRIMARY	NA	CRPR	CB	NEITHER	11.039	1	45.1745	1
EA595624	CM-025	NIVOLUMAB	M	67	Yes	1	FFPE	PRIMARY	NA	CRPR	CB	NEITHER	11.8275	1	17.8398	0
EA595454	CM-025	NIVOLUMAB	M	69	Yes	1	FFPE	METASTASIS	LYMPH NODES	SD	CB	NEITHER	11.1047	1	37.8152	1
P66291-09D-Run1_S11_L001	CM-025	NIVOLUMAB	M	63	Yes	1	FFPE	PRIMARY	NA	SD	ICB	NEITHER	5.58522	1	19.5811	1
EA632234	CM-025	NIVOLUMAB	M	58	Yes	1	FFPE	PRIMARY	NA	SD	CB	NEITHER	8.34497	1	16.9199	1
P66511-07H-Run1_S19_L002	CM-025	NIVOLUMAB	M	66	Yes	1	FFPE	PRIMARY	NA	SD	ICB	NEITHER	3.77823	1	8.27926	1
EA647826	CM-025	NIVOLUMAB	F	59	Yes	1	FFPE	PRIMARY	NA	CRPR	CB	NEITHER	5.78234	1	25.9877	1
P66451-07A-Run1_S15_L002	CM-025	NIVOLUMAB	F	47	Yes	1	FFPE	PRIMARY	NA	PD	NCB	PD	1.90554	1	16.7885	1
P66511-06F-Run1_S15_L001	CM-025	NIVOLUMAB	F	51	Yes	2	FFPE	METASTASIS	OTHER	PD	NCB	PD	1.51129	1	3.02259	1
P66287-02A-Run1_S5_L001	CM-025	NIVOLUMAB	M	57	Yes	1	FFPE	PRIMARY	NA	CRPR	CB	ER	46.0945	0	50.7598	0
P66282-03D-Run1_S11_L001	CM-025	NIVOLUMAB	M	50	Yes	1	FFPE	PRIMARY	NA	PD	NCB	PD	1.80698	1	5.51951	0
P66287-11B-Run1_S21_L002	CM-025	NIVOLUMAB	M	76	Yes	1	FFPE	PRIMARY	NA	CRPR	CB	NEITHER	9.3306	1	9.3306	1
P66287-08B-Run1_S7_L001	CM-025	NIVOLUMAB	M	58	Yes	1	FFPE	METASTASIS	OTHER	PD	NCB	PD	1.74127	1	13.3388	1
EA639040	CM-025	NIVOLUMAB	M	71	Yes	2	FFPE	PRIMARY	NA	PD	NCB	PD	1.67556	1	34.037	1
P66507-04D-Run1_S3_L001	CM-025	NIVOLUMAB	M	63	Yes	1	FFPE	PRIMARY	NA	CRPR	CB	NEITHER	10.152	0	55.3593	0
P66507-07G-Run1_S17_L002	CM-025	NIVOLUMAB	M	67	Yes	1	FFPE	PRIMARY	NA	CRPR	CB	NEITHER	5.58522	1	55.1294	0
P66425-05B-Run1_S21_L002	CM-025	NIVOLUMAB	F	63	Yes	1	FFPE	METASTASIS	LYMPH NODES	PD	NCB	PD	1.64271	1	63.5072	0
P66425-03B-Run1_S10_L001	CM-025	NIVOLUMAB	F	74	Yes	3	FFPE	PRIMARY	NA	SD	ICB	NEITHER	3.58111	1	9.59343	1
EA639069	CM-025	NIVOLUMAB	M	52	Yes	2	FFPE	PRIMARY	NA	PD	NCB	PD	1.87269	1	54.8008	0
P66282-11G-Run1_S20_L002	CM-025	NIVOLUMAB	M	63	Yes	1	FFPE	PRIMARY	NA	PD	NCB	PD	1.97125	1	2.00411	1
RCC_102_T_SCR	CM-009	NIVOLUMAB	MALE	64	Yes	NA	FROZEN	METASTASIS	SoftTissue	SD	ICB	NEITHER	3.55068	1	5.42466	0
RCC_105_T_SCR	CM-009	NIVOLUMAB	MALE	64	Yes	NA	FROZEN	METASTASIS	SoftTissue	PD	NCB	PD	1.47945	1	3.87945	1
RCC_106_T_SCR	CM-009	NIVOLUMAB	FEMALE	61	Yes	NA	FROZEN	METASTASIS	SoftTissue	PR	CB	NEITHER	26.9918	0	28.6027	0
RCC_115_T_SCR	CM-009	NIVOLUMAB	MALE	60	Yes	NA	FROZEN	METASTASIS	LymphNode	SD	ICB	NEITHER	2.86027	1	12.0329	0
RCC_117_T_SCR	CM-009	NIVOLUMAB	MALE	58	No	0	FROZEN	METASTASIS	Adrenal	SD	ICB	NEITHER	1.24932	0	2.10411	0
RCC_14_T_SCR	CM-009	NIVOLUMAB	MALE	59	No	0	FROZEN	METASTASIS	LymphNode	PR	CB	NEITHER	17.7863	1	33.6986	0
RCC_18_T_SCR	CM-009	NIVOLUMAB	MALE	68	Yes	NA	FROZEN	METASTASIS	Liver	PD	NCB	PD	1.4137	1	3.64932	0
RCC_21_T_SCR	CM-009	NIVOLUMAB	MALE	64	Yes	NA	FROZEN	METASTASIS	LymphNode	SD	ICB	NEITHER	1.4137	0	11.474	0
RCC_27_T_SCR	CM-009	NIVOLUMAB	MALE	59	Yes	NA	FROZEN	METASTASIS	Liver	PD	NCB	PD	1.15068	1	31.8247	0
RCC_41_T_SCR	CM-009	NIVOLUMAB	MALE	66	Yes	NA	FROZEN	METASTASIS	SoftTissue	PD	NCB	PD	1.38082	1	6.41096	0
RCC_50_T_SCR	CM-009	NIVOLUMAB	FEMALE	63	No	0	FROZEN	METASTASIS	SoftTissue	SD	CB	NEITHER	2.8274	1	32.2849	0
RCC_73_T_SCR	CM-009	NIVOLUMAB	MALE	77	Yes	NA	FROZEN	METASTASIS	SoftTissue	PD	NCB	PD	1.90685	1	5.85205	1
RCC_90_T_SCR	CM-009	NIVOLUMAB	MALE	54	Yes	NA	FROZEN	METASTASIS	SoftTissue	PD	NCB	PD	1.18356	1	16.4055	1
RCC_93_T_SCR	CM-009	NIVOLUMAB	MALE	64	Yes	NA	FROZEN	METASTASIS	Liver	PR	CB	NEITHER	16.4384	1	22.4877	1
RCC_96_T_SCR	CM-009	NIVOLUMAB	FEMALE	75	Yes	NA	FROZEN	METASTASIS	SoftTissue	PD	NCB	PD	1.21644	1	19.1342	0
RCC_99_T_SCR	CM-009	NIVOLUMAB	MALE	50	Yes	NA	FROZEN	METASTASIS	LymphNode	PD	NCB	PD	1.34795	1	1.34795	1

## Sheet: S5
Table-S4: Spearman correlation analysis of the 24 m6A regulators
From	To	Pvalue (< 0.0001)	Cor	Weight
IGF2BP2	YTHDC1	2.31604e-14	-0.32993	13.6353
IGF2BP3	YTHDC1	3.30483e-17	-0.360695	16.4809
YTHDF1	YTHDC1	0	0.386779	Inf
WTAP	YTHDC1	9.68152e-18	0.363075	17.0141
RBM15B	YTHDC1	1.76735e-13	0.319098	12.7527
ELAVL1	YTHDC1	7.11621e-08	0.23582	7.14775
IGF2BP3	IGF2BP1	3.7272e-06	0.202617	5.42862
KIAA1429	IGF2BP1	7.72625e-05	0.173614	4.11203
FTO	IGF2BP1	2.30308e-06	0.206851	5.63769
IGF2BP3	IGF2BP2	5.66007e-38	0.526807	37.2472
YTHDC2	IGF2BP2	1.71418e-06	-0.209882	5.76594
HNRNPC	IGF2BP2	1.57348e-09	-0.263461	8.80314
RBMX	IGF2BP2	3.34757e-11	-0.288534	10.4753
METTL14	IGF2BP2	2.85549e-12	-0.303354	11.5443
FTO	IGF2BP2	2.65475e-10	-0.275361	9.57598
ALKBH5	IGF2BP2	1.93933e-12	-0.305606	11.7123
LRPPRC	IGF2BP2	5.42114e-07	-0.219625	6.26591
YTHDF2	IGF2BP3	9.28631e-05	-0.171701	4.03216
HNRNPC	IGF2BP3	1.40664e-10	-0.278301	9.85182
RBMX	IGF2BP3	6.92405e-11	-0.282759	10.1596
METTL14	IGF2BP3	5.86885e-10	-0.269065	9.23145
ALKBH5	IGF2BP3	1.47914e-10	-0.277982	9.82999
YTHDF3	YTHDF1	1.43842e-12	0.307331	11.8421
YTHDC2	YTHDF1	1.75598e-11	0.292503	10.7555
HNRNPC	YTHDF1	2.53364e-05	0.185116	4.59625
RBMX	YTHDF1	6.56773e-06	0.197911	5.18258
METTL3	YTHDF1	1.34353e-16	0.354134	15.8718
WTAP	YTHDF1	1.69279e-06	0.209991	5.7714
FMR1	YTHDF1	8.4946e-17	0.355944	16.0709
LRPPRC	YTHDF1	1.55112e-06	0.210746	5.80935
HNRNPC	YTHDF3	4.63463e-09	0.255946	8.33398
RBMX	YTHDF3	1.16161e-18	0.366748	17.9349
WTAP	YTHDF3	7.55995e-12	0.297596	11.1215
RBM15B	YTHDF3	1.00571e-12	0.309381	11.9975
ALKBH5	YTHDF3	2.22854e-06	0.207597	5.65198
ELAVL1	YTHDF3	9.63938e-07	0.21481	6.01595
YTHDF2	YTHDC2	3.10324e-15	0.34003	14.5082
METTL3	YTHDC2	6.11844e-12	0.298858	11.2134
HNRNPC	HNRNPA2B1	2.18877e-08	0.24472	7.6598
RBMX	HNRNPA2B1	8.84256e-16	0.345964	15.0534
METTL14	HNRNPA2B1	2.61914e-10	0.275449	9.58184
WTAP	HNRNPA2B1	5.40834e-13	0.312894	12.2669
RBM15B	HNRNPA2B1	4.89416e-09	0.255561	8.31032
ZC3H13	HNRNPA2B1	7.02216e-14	0.324089	13.1535
CBLL1	HNRNPA2B1	5.28566e-07	0.219835	6.2769
FMR1	HNRNPA2B1	3.80913e-15	0.339032	14.4192
ELAVL1	HNRNPA2B1	2.27501e-13	0.317712	12.643
RBMX	YTHDF2	2.58409e-15	0.340916	14.5877
WTAP	YTHDF2	2.09039e-17	0.360872	16.6798
FMR1	YTHDF2	3.43634e-12	0.302269	11.4639
ELAVL1	YTHDF2	1.01344e-15	0.345336	14.9942
METTL3	HNRNPC	4.05763e-08	0.240103	7.39173
WTAP	HNRNPC	7.88999e-14	0.323466	13.1029
KIAA1429	HNRNPC	2.73807e-11	0.289777	10.5626
RBM15	HNRNPC	7.47942e-15	0.335692	14.1261
RBM15B	HNRNPC	2.47551e-08	0.243807	7.60634
ZC3H13	HNRNPC	2.64698e-15	0.3408	14.5772
FTO	HNRNPC	5.9953e-07	0.218791	6.22219
CBLL1	HNRNPC	8.11842e-14	0.323313	13.0905
LRPPRC	HNRNPC	6.00133e-15	0.33679	14.2218
RBM15B	RBMX	1.3726e-08	0.248151	7.86246
ALKBH5	RBMX	1.028e-09	0.26636	8.98801
METTL14	METTL3	1.14359e-08	0.249479	7.94173
WTAP	METTL3	1.16602e-06	0.213193	5.93329
RBM15	METTL3	4.42468e-10	0.272002	9.35412
RBM15B	METTL3	3.63599e-06	0.203266	5.43938
FMR1	METTL3	7.21682e-16	0.346892	15.1417
WTAP	METTL14	5.02809e-16	0.348517	15.2986
ELAVL1	METTL14	2.7416e-10	0.275151	9.562
KIAA1429	WTAP	5.21871e-06	0.20001	5.28244
RBM15	WTAP	4.49158e-13	0.313936	12.3476
ZC3H13	WTAP	5.14273e-12	0.29989	11.2888
FTO	WTAP	4.44666e-10	0.27197	9.35197
CBLL1	WTAP	7.91293e-12	0.297323	11.1017
FMR1	WTAP	9.50985e-11	0.281978	10.0218
LRPPRC	WTAP	3.12563e-09	0.258713	8.50506
RBM15	KIAA1429	1.39533e-18	0.366568	17.8553
RBM15B	KIAA1429	1.26889e-14	0.333022	13.8966
ALKBH5	KIAA1429	1.71923e-05	0.188877	4.76467
RBM15B	RBM15	1.12097e-12	0.308761	11.9504
ALKBH5	RBM15	4.11656e-19	0.36741	18.3855
ELAVL1	RBM15	1.29823e-05	0.191557	4.88665
ALKBH5	RBM15B	3.34685e-08	0.241554	7.47536
FMR1	RBM15B	8.19664e-11	0.282921	10.0864
LRPPRC	RBM15B	7.33427e-12	0.297777	11.1346
ALKBH5	ZC3H13	5.49941e-14	0.325392	13.2597
ELAVL1	ZC3H13	3.44116e-14	0.327865	13.4633
FMR1	FTO	5.62257e-13	0.312676	12.2501
CBLL1	ALKBH5	2.52216e-07	0.225868	6.59823
FMR1	ALKBH5	4.46101e-06	0.20143	5.35057
LRPPRC	ALKBH5	3.19986e-09	0.258549	8.49487
ELAVL1	ALKBH5	4.20381e-11	0.287118	10.3764
ELAVL1	CBLL1	3.18144e-08	0.241934	7.49738
ELAVL1	FMR1	1.37734e-10	0.27961	9.86096

## Sheet: S6
Table-S5: The activation states of biological pathways in distinct m6A modification patterns by GSVA enrichment analysis
m6Acluster C2 vs m6Acluster C3
Pathway	logFC	AveExpr	t	P.Value	adj.P.Val	B
KEGG_OLFACTORY_TRANSDUCTION	0.170555	0.0956884	11.2117	1.31898e-25	2.4533e-23	47.382
KEGG_NOTCH_SIGNALING_PATHWAY	-0.264254	-0.0321494	-10.5007	5.50367e-23	1.01818e-20	41.4586
KEGG_CIRCADIAN_RHYTHM_MAMMAL	-0.290461	-0.0102249	-9.68143	4.36045e-20	8.02323e-18	34.9115
KEGG_VASCULAR_SMOOTH_MUSCLE_CONTRACTION	-0.221856	-0.0416482	-9.02043	7.47092e-18	1.36718e-15	29.8724
KEGG_ADIPOCYTOKINE_SIGNALING_PATHWAY	-0.205832	-0.00820192	-8.85991	2.51563e-17	4.57844e-15	28.684
KEGG_ACUTE_MYELOID_LEUKEMIA	-0.230985	-0.0408829	-8.848	2.75118e-17	4.97963e-15	28.5964
KEGG_DORSO_VENTRAL_AXIS_FORMATION	-0.255019	-0.0291271	-8.69994	8.31649e-17	1.49697e-14	27.514
KEGG_RIG_I_LIKE_RECEPTOR_SIGNALING_PATHWAY	-0.181935	-0.0208574	-8.68211	9.49381e-17	1.69939e-14	27.3844
KEGG_LEUKOCYTE_TRANSENDOTHELIAL_MIGRATION	-0.217344	-0.053003	-8.64618	1.23895e-16	2.20533e-14	27.124
KEGG_VEGF_SIGNALING_PATHWAY	-0.167091	-0.0491516	-8.40768	7.11822e-16	1.25992e-13	25.4142
KEGG_T_CELL_RECEPTOR_SIGNALING_PATHWAY	-0.224329	-0.0513894	-8.39664	7.71179e-16	1.35727e-13	25.3359
KEGG_ENDOCYTOSIS	-0.1955	-0.0292345	-8.27791	1.81739e-15	3.18044e-13	24.4981
KEGG_NEUROTROPHIN_SIGNALING_PATHWAY	-0.221042	-0.026419	-8.20432	3.07891e-15	5.35731e-13	23.9829
KEGG_BLADDER_CANCER	-0.197957	-0.0470457	-8.18285	3.58857e-15	6.20822e-13	23.8333
KEGG_CHEMOKINE_SIGNALING_PATHWAY	-0.207677	-0.0645968	-8.11137	5.96417e-15	1.02584e-12	23.337
KEGG_MAPK_SIGNALING_PATHWAY	-0.166462	-0.043355	-8.09774	6.5681e-15	1.12314e-12	23.2428
KEGG_B_CELL_RECEPTOR_SIGNALING_PATHWAY	-0.218982	-0.0563505	-8.0317	1.04676e-14	1.77948e-12	22.7877
KEGG_PHOSPHATIDYLINOSITOL_SIGNALING_SYSTEM	-0.217957	-0.0267923	-8.01342	1.19029e-14	2.0116e-12	22.6622
KEGG_INOSITOL_PHOSPHATE_METABOLISM	-0.228277	-0.0143829	-8.00429	1.26916e-14	2.13219e-12	22.5995
KEGG_GNRH_SIGNALING_PATHWAY	-0.164338	-0.0370279	-7.93724	2.02925e-14	3.38885e-12	22.1413
KEGG_RENAL_CELL_CARCINOMA	-0.233629	-0.0209333	-7.83869	4.02436e-14	6.68043e-12	21.473
KEGG_THYROID_CANCER	-0.213009	-0.0243349	-7.81579	4.71432e-14	7.77863e-12	21.3186
KEGG_FC_EPSILON_RI_SIGNALING_PATHWAY	-0.169541	-0.0409316	-7.7236	8.88484e-14	1.45711e-11	20.7003
KEGG_CHRONIC_MYELOID_LEUKEMIA	-0.220752	-0.0278387	-7.65274	1.44085e-13	2.34859e-11	20.2287
KEGG_SMALL_CELL_LUNG_CANCER	-0.204219	-0.042238	-7.60482	1.99436e-13	3.23087e-11	19.9117
KEGG_NON_SMALL_CELL_LUNG_CANCER	-0.203014	-0.0228424	-7.59451	2.13858e-13	3.44312e-11	19.8437
KEGG_MTOR_SIGNALING_PATHWAY	-0.180903	-0.0248265	-7.58846	2.22783e-13	3.56453e-11	19.8038
KEGG_AXON_GUIDANCE	-0.192653	-0.0581943	-7.55636	2.76662e-13	4.39893e-11	19.5926
KEGG_PANCREATIC_CANCER	-0.217898	-0.0213114	-7.55189	2.85131e-13	4.50506e-11	19.5632
KEGG_NATURAL_KILLER_CELL_MEDIATED_CYTOTOXICITY	-0.192326	-0.0495289	-7.54672	2.9522e-13	4.63496e-11	19.5293
KEGG_ERBB_SIGNALING_PATHWAY	-0.193897	-0.0295492	-7.48057	4.60196e-13	7.17905e-11	19.0966
KEGG_JAK_STAT_SIGNALING_PATHWAY	-0.154054	-0.0536598	-7.46471	5.11659e-13	7.93072e-11	18.9933
KEGG_VASOPRESSIN_REGULATED_WATER_REABSORPTION	-0.216938	-0.0087226	-7.30605	1.46435e-12	2.2551e-10	17.9689
KEGG_GLYCEROLIPID_METABOLISM	-0.135368	-0.0288341	-7.29631	1.56115e-12	2.38856e-10	17.9066
KEGG_PROSTATE_CANCER	-0.1989	-0.0221911	-7.24556	2.17692e-12	3.30891e-10	17.5829
KEGG_APOPTOSIS	-0.184797	-0.0386654	-7.21249	2.70113e-12	4.07871e-10	17.3728
KEGG_CELL_ADHESION_MOLECULES_CAMS	-0.194724	-0.0682179	-7.12018	4.91385e-12	7.37077e-10	16.7904
KEGG_TGF_BETA_SIGNALING_PATHWAY	-0.19843	-0.0450776	-7.10632	5.37332e-12	8.00624e-10	16.7034
KEGG_PATHWAYS_IN_CANCER	-0.165553	-0.0473751	-6.9961	1.08844e-11	1.61089e-09	16.0168
KEGG_GLIOMA	-0.185994	-0.036602	-6.98602	1.16055e-11	1.70601e-09	15.9544
KEGG_FOCAL_ADHESION	-0.199094	-0.0571049	-6.98084	1.19941e-11	1.75114e-09	15.9224
KEGG_TIGHT_JUNCTION	-0.161855	-0.0361415	-6.97956	1.20923e-11	1.75338e-09	15.9145
KEGG_MELANOGENESIS	-0.148568	-0.0549586	-6.96582	1.31952e-11	1.90011e-09	15.8296
KEGG_TYPE_II_DIABETES_MELLITUS	-0.15105	-0.0271621	-6.84273	2.86696e-11	4.09975e-09	15.0753
KEGG_ENDOMETRIAL_CANCER	-0.201604	-0.0125238	-6.69615	7.12554e-11	1.01183e-08	14.191
KEGG_HISTIDINE_METABOLISM	-0.179842	0.0138803	-6.66132	8.82729e-11	1.24465e-08	13.9831
KEGG_ADHERENS_JUNCTION	-0.203773	-0.0229466	-6.64579	9.70896e-11	1.35925e-08	13.8907
KEGG_COLORECTAL_CANCER	-0.192499	-0.0257459	-6.63092	1.06339e-10	1.47812e-08	13.8023
KEGG_TOLL_LIKE_RECEPTOR_SIGNALING_PATHWAY	-0.167869	-0.0406159	-6.60161	1.27173e-10	1.75498e-08	13.6287
KEGG_INSULIN_SIGNALING_PATHWAY	-0.153117	-0.0202492	-6.59015	1.36365e-10	1.8682e-08	13.561
KEGG_PPAR_SIGNALING_PATHWAY	-0.157436	-0.00203258	-6.52853	1.98137e-10	2.69466e-08	13.1985
KEGG_DILATED_CARDIOMYOPATHY	-0.16332	-0.0726078	-6.48738	2.53903e-10	3.42769e-08	12.958
KEGG_ARRHYTHMOGENIC_RIGHT_VENTRICULAR_CARDIOMYOPATHY_ARVC	-0.17365	-0.0659735	-6.43842	3.4053e-10	4.56311e-08	12.6734
KEGG_RENIN_ANGIOTENSIN_SYSTEM	-0.194084	-0.0109063	-6.40797	4.08372e-10	5.43135e-08	12.4973
KEGG_VIRAL_MYOCARDITIS	-0.183586	-0.0704822	-6.3912	4.5122e-10	5.95611e-08	12.4006
KEGG_NOD_LIKE_RECEPTOR_SIGNALING_PATHWAY	-0.16483	-0.0612451	-6.36025	5.42153e-10	7.1022e-08	12.2227
KEGG_SNARE_INTERACTIONS_IN_VESICULAR_TRANSPORT	-0.138861	-0.0158086	-6.34827	5.81987e-10	7.56583e-08	12.154
KEGG_CALCIUM_SIGNALING_PATHWAY	-0.131175	-0.0569927	-6.26253	9.63667e-10	1.24313e-07	11.6655
KEGG_SPLICEOSOME	-0.160506	-0.00762721	-6.11642	2.24792e-09	2.87734e-07	10.8458
KEGG_WNT_SIGNALING_PATHWAY	-0.152169	-0.0486422	-6.1143	2.27534e-09	2.88969e-07	10.8341
KEGG_HYPERTROPHIC_CARDIOMYOPATHY_HCM	-0.144247	-0.0719441	-5.99486	4.49392e-09	5.66233e-07	10.1761
KEGG_CYTOSOLIC_DNA_SENSING_PATHWAY	-0.127795	-0.0372773	-5.96552	5.3029e-09	6.62862e-07	10.0161
KEGG_PANTOTHENATE_AND_COA_BIOSYNTHESIS	-0.15683	-0.0434841	-5.83691	1.08741e-08	1.34839e-06	9.32268
KEGG_GAP_JUNCTION	-0.146061	-0.0524256	-5.74513	1.80148e-08	2.21582e-06	8.83567
KEGG_LYSINE_DEGRADATION	-0.18147	0.00842315	-5.74112	1.84144e-08	2.24656e-06	8.81452
KEGG_ONE_CARBON_POOL_BY_FOLATE	-0.170578	-0.00202807	-5.7149	2.12439e-08	2.57051e-06	8.6767
KEGG_ABC_TRANSPORTERS	-0.11276	-0.0393427	-5.70761	2.21039e-08	2.65247e-06	8.63844
KEGG_REGULATION_OF_ACTIN_CYTOSKELETON	-0.141699	-0.0536245	-5.69938	2.31145e-08	2.75063e-06	8.59534
KEGG_LIMONENE_AND_PINENE_DEGRADATION	-0.232577	0.0408455	-5.64475	3.10642e-08	3.66558e-06	8.31048
KEGG_BETA_ALANINE_METABOLISM	-0.186801	0.00960741	-5.61143	3.71583e-08	4.34752e-06	8.13792
KEGG_LEISHMANIA_INFECTION	-0.187982	-0.0713799	-5.60497	3.84677e-08	4.46225e-06	8.10456
KEGG_LONG_TERM_POTENTIATION	-0.139223	-0.0422381	-5.50549	6.53093e-08	7.51057e-06	7.59503
KEGG_MELANOMA	-0.126914	-0.0362088	-5.50506	6.54585e-08	7.51057e-06	7.59283
KEGG_LONG_TERM_DEPRESSION	-0.123773	-0.0443463	-5.40476	1.10758e-07	1.25157e-05	7.08706
KEGG_FC_GAMMA_R_MEDIATED_PHAGOCYTOSIS	-0.142682	-0.0605782	-5.3437	1.51973e-07	1.7021e-05	6.7831
KEGG_ANTIGEN_PROCESSING_AND_PRESENTATION	-0.158444	-0.043877	-5.2411	2.56901e-07	2.8516e-05	6.27912
KEGG_TRYPTOPHAN_METABOLISM	-0.152225	-0.00044229	-5.20463	3.08983e-07	3.39882e-05	6.10206
KEGG_HEMATOPOIETIC_CELL_LINEAGE	-0.147047	-0.0806526	-5.11329	4.88359e-07	5.32312e-05	5.6633
KEGG_CYTOKINE_CYTOKINE_RECEPTOR_INTERACTION	-0.121007	-0.0748975	-5.02041	7.72629e-07	8.34439e-05	5.2241
KEGG_ALDOSTERONE_REGULATED_SODIUM_REABSORPTION	-0.124558	-0.0466219	-4.94211	1.13132e-06	0.000121051	4.85942
KEGG_PURINE_METABOLISM	-0.0922126	-0.0508469	-4.85678	1.70478e-06	0.000180706	4.46772
KEGG_GRAFT_VERSUS_HOST_DISEASE	-0.201121	-0.070624	-4.80929	2.13632e-06	0.000224314	4.25237
KEGG_GLYCEROPHOSPHOLIPID_METABOLISM	-0.0762234	-0.0435455	-4.78128	2.43835e-06	0.000253589	4.12624
KEGG_PROXIMAL_TUBULE_BICARBONATE_RECLAMATION	-0.144647	-0.00998511	-4.69464	3.65582e-06	0.00037655	3.74028
KEGG_NEUROACTIVE_LIGAND_RECEPTOR_INTERACTION	-0.0812914	-0.0518256	-4.68915	3.75009e-06	0.000382509	3.71604
KEGG_PROGESTERONE_MEDIATED_OOCYTE_MATURATION	-0.113466	-0.0389194	-4.64405	4.61816e-06	0.000466434	3.51783
KEGG_ECM_RECEPTOR_INTERACTION	-0.148681	-0.0778222	-4.6344	4.82753e-06	0.000482753	3.47564
KEGG_AMYOTROPHIC_LATERAL_SCLEROSIS_ALS	-0.0994019	-0.0718159	-4.6294	4.93964e-06	0.000489025	3.4538
KEGG_ALLOGRAFT_REJECTION	-0.19938	-0.0664282	-4.54713	7.18411e-06	0.000704043	3.09768
KEGG_AUTOIMMUNE_THYROID_DISEASE	-0.157662	-0.0370241	-4.53202	7.69098e-06	0.000746025	3.03292
KEGG_HEDGEHOG_SIGNALING_PATHWAY	-0.100049	-0.0780786	-4.38712	1.465e-05	0.0014064	2.42166
KEGG_ASTHMA	-0.162352	-0.0626558	-4.30941	2.05511e-05	0.00195236	2.10126
KEGG_EPITHELIAL_CELL_SIGNALING_IN_HELICOBACTER_PYLORI_INFECTION	-0.107843	-0.0392192	-4.18029	3.56657e-05	0.00335257	1.58049
KEGG_BASAL_CELL_CARCINOMA	-0.09784	-0.0816267	-4.17009	3.72316e-05	0.00346254	1.53996
KEGG_RNA_POLYMERASE	-0.103121	-0.0212399	-4.15525	3.96274e-05	0.00364572	1.48115
KEGG_TYPE_I_DIABETES_MELLITUS	-0.160176	-0.067846	-4.06814	5.69274e-05	0.00518039	1.13992
KEGG_FRUCTOSE_AND_MANNOSE_METABOLISM	-0.116615	-0.0394948	-4.04941	6.14856e-05	0.0055337	1.06745
KEGG_FATTY_ACID_METABOLISM	-0.142158	0.0243127	-4.01908	6.96153e-05	0.00619576	0.950686
KEGG_INTESTINAL_IMMUNE_NETWORK_FOR_IGA_PRODUCTION	-0.139418	-0.0869795	-3.93742	9.68766e-05	0.00852514	0.640384
KEGG_TERPENOID_BACKBONE_BIOSYNTHESIS	-0.134721	0.0209823	-3.93337	9.84624e-05	0.00856623	0.625153
KEGG_UBIQUITIN_MEDIATED_PROTEOLYSIS	-0.109474	-0.0215376	-3.87044	0.000126505	0.0108794	0.390278
KEGG_BASAL_TRANSCRIPTION_FACTORS	-0.106295	-0.015231	-3.84903	0.000137658	0.011701	0.311177
KEGG_PRIMARY_IMMUNODEFICIENCY	-0.140317	-0.0896954	-3.84496	0.000139884	0.0117502	0.29617
KEGG_GLYCINE_SERINE_AND_THREONINE_METABOLISM	-0.110904	-0.0193527	-3.67272	0.000272017	0.0225774	-0.324721
KEGG_ARGININE_AND_PROLINE_METABOLISM	-0.101001	-0.0227982	-3.65773	0.000287885	0.0236065	-0.377507
KEGG_ASCORBATE_AND_ALDARATE_METABOLISM	-0.125138	0.00299713	-3.64884	0.00029769	0.0241129	-0.40868
KEGG_NUCLEOTIDE_EXCISION_REPAIR	-0.0982305	-0.0269082	-3.60435	0.000351729	0.0281383	-0.563801
KEGG_NITROGEN_METABOLISM	-0.0770916	-0.0141002	-3.56857	0.00040172	0.0317359	-0.68723
KEGG_BIOSYNTHESIS_OF_UNSATURATED_FATTY_ACIDS	-0.106083	-0.0192123	-3.49633	0.000523628	0.040843	-0.932942
KEGG_REGULATION_OF_AUTOPHAGY	-0.0806456	0.0309223	-3.47805	0.000559553	0.0430856	-0.99437
m6Acluster C1 vs m6Acluster C3
Pathway	logFC	AveExpr	t	P.Value	adj.P.Val	B
KEGG_OLFACTORY_TRANSDUCTION	0.135317	0.0868567	9.39991	3.72588e-19	6.93014e-17	32.8013
KEGG_CYTOKINE_CYTOKINE_RECEPTOR_INTERACTION	0.146029	0.00237627	6.65273	9.10921e-11	1.6852e-08	14.0362
KEGG_HISTIDINE_METABOLISM	-0.171451	0.0124915	-6.54839	1.72221e-10	3.16887e-08	13.421
KEGG_HEMATOPOIETIC_CELL_LINEAGE	0.172681	0.0116468	6.20879	1.29675e-09	2.37305e-07	11.4737
KEGG_NITROGEN_METABOLISM	-0.129152	-0.0305941	-6.17115	1.61355e-09	2.93667e-07	11.2631
KEGG_GLYCOSAMINOGLYCAN_BIOSYNTHESIS_CHONDROITIN_SULFATE	0.179921	-0.016422	6.03846	3.45787e-09	6.25874e-07	10.5293
KEGG_COMPLEMENT_AND_COAGULATION_CASCADES	0.158966	-0.0336152	5.95501	5.54712e-09	9.98482e-07	10.0746
KEGG_LIMONENE_AND_PINENE_DEGRADATION	-0.223738	0.0380057	-5.61044	3.69347e-08	6.61132e-06	8.25404
KEGG_NEUROACTIVE_LIGAND_RECEPTOR_INTERACTION	0.09311	-0.00134508	5.48482	7.20775e-08	1.28298e-05	7.61338
KEGG_TERPENOID_BACKBONE_BIOSYNTHESIS	-0.176819	0.00556513	-5.21552	2.89924e-07	5.13166e-05	6.28236
KEGG_PROPANOATE_METABOLISM	-0.192134	0.00769161	-5.07987	5.71961e-07	0.000100665	5.63411
KEGG_INTESTINAL_IMMUNE_NETWORK_FOR_IGA_PRODUCTION	0.170692	0.00278107	5.07423	5.88162e-07	0.000102928	5.60749
KEGG_RNA_POLYMERASE	-0.130036	-0.030746	-5.06999	6.00622e-07	0.000104508	5.5875
KEGG_RNA_DEGRADATION	-0.119206	-0.0189001	-5.05238	6.55205e-07	0.00011335	5.50461
KEGG_CELL_ADHESION_MOLECULES_CAMS	0.132172	0.0249874	5.01514	7.86897e-07	0.000135346	5.33012
KEGG_LEISHMANIA_INFECTION	0.158103	0.0276405	4.91083	1.30666e-06	0.00022344	4.84741
KEGG_VIRAL_MYOCARDITIS	0.13571	0.0207637	4.85265	1.72715e-06	0.000293616	4.58215
KEGG_SNARE_INTERACTIONS_IN_VESICULAR_TRANSPORT	-0.106258	-0.00870506	-4.81286	2.08705e-06	0.000352712	4.40231
KEGG_GLYOXYLATE_AND_DICARBOXYLATE_METABOLISM	-0.147278	-0.0586827	-4.76929	2.56384e-06	0.000430725	4.20694
KEGG_PRIMARY_IMMUNODEFICIENCY	0.16724	-0.000646346	4.76086	2.66752e-06	0.000445476	4.16931
KEGG_PYRUVATE_METABOLISM	-0.145949	-0.0340888	-4.75042	2.8015e-06	0.000465049	4.12281
KEGG_VALINE_LEUCINE_AND_ISOLEUCINE_DEGRADATION	-0.187616	0.0148969	-4.74997	2.80743e-06	0.000465049	4.1208
KEGG_FATTY_ACID_METABOLISM	-0.162472	0.0150601	-4.64272	4.62049e-06	0.000757761	3.64839
KEGG_CHEMOKINE_SIGNALING_PATHWAY	0.114513	0.0269012	4.60768	5.42622e-06	0.000884473	3.49616
KEGG_SPLICEOSOME	-0.116233	0.00230134	-4.60391	5.52046e-06	0.000894314	3.47985
KEGG_SELENOAMINO_ACID_METABOLISM	-0.121001	-0.0487013	-4.55463	6.90813e-06	0.00111221	3.26764
KEGG_BUTANOATE_METABOLISM	-0.150351	-0.00739198	-4.54866	7.09743e-06	0.00113559	3.24207
KEGG_ASTHMA	0.158174	0.0292162	4.51606	8.22162e-06	0.00130724	3.10303
KEGG_PEROXISOME	-0.144028	-0.00862503	-4.48588	9.41356e-06	0.00148734	2.97508
KEGG_ONE_CARBON_POOL_BY_FOLATE	-0.136457	0.00461669	-4.43523	1.17946e-05	0.00185175	2.76212
KEGG_PRION_DISEASES	0.114011	-0.0156558	4.4093	1.32271e-05	0.00206343	2.65393
KEGG_ECM_RECEPTOR_INTERACTION	0.140298	0.0053854	4.40647	1.33934e-05	0.00207597	2.64215
KEGG_JAK_STAT_SIGNALING_PATHWAY	0.0864907	0.0147797	4.38845	1.44986e-05	0.00223278	2.56735
KEGG_BASAL_TRANSCRIPTION_FACTORS	-0.109825	-0.0180724	-4.30911	2.04903e-05	0.00313501	2.24135
KEGG_DILATED_CARDIOMYOPATHY	0.11115	0.00595743	4.30017	2.12978e-05	0.00323727	2.20495
KEGG_NATURAL_KILLER_CELL_MEDIATED_CYTOTOXICITY	0.103201	0.0341678	4.15045	4.02826e-05	0.00608267	1.60579
KEGG_PPAR_SIGNALING_PATHWAY	-0.0973717	0.0124694	-4.0714	5.59715e-05	0.00839573	1.29732
KEGG_AUTOIMMUNE_THYROID_DISEASE	0.134913	0.0462481	4.06726	5.69355e-05	0.00848339	1.28132
KEGG_CIRCADIAN_RHYTHM_MAMMAL	-0.120235	0.0340549	-4.04593	6.21608e-05	0.0091998	1.19907
KEGG_BETA_ALANINE_METABOLISM	-0.134999	0.0208763	-4.00297	7.40956e-05	0.010892	1.03469
KEGG_BIOSYNTHESIS_OF_UNSATURATED_FATTY_ACIDS	-0.122868	-0.0258515	-3.99578	7.6294e-05	0.0111389	1.00734
KEGG_LYSINE_DEGRADATION	-0.12647	0.0207578	-3.94738	9.27894e-05	0.0134545	0.82437
KEGG_CITRATE_CYCLE_TCA_CYCLE	-0.163313	-0.0161125	-3.92216	0.000102671	0.0147846	0.729862
KEGG_GRAFT_VERSUS_HOST_DISEASE	0.159203	0.0322896	3.90921	0.000108124	0.0154617	0.681554
KEGG_PROXIMAL_TUBULE_BICARBONATE_RECLAMATION	-0.115684	-0.00417785	-3.88234	0.000120332	0.0170871	0.581749
KEGG_FC_GAMMA_R_MEDIATED_PHAGOCYTOSIS	0.101548	0.0093035	3.88146	0.00012075	0.0170871	0.578513
KEGG_HEDGEHOG_SIGNALING_PATHWAY	0.0847802	-0.0243959	3.86771	0.000127511	0.0178516	0.527708
KEGG_HYPERTROPHIC_CARDIOMYOPATHY_HCM	0.0949284	-0.0033478	3.86127	0.000130801	0.0181814	0.503959
KEGG_GLYCINE_SERINE_AND_THREONINE_METABOLISM	-0.113879	-0.0220414	-3.84153	0.000141387	0.0195114	0.431439
KEGG_TYPE_I_DIABETES_MELLITUS	0.14384	0.0193381	3.77101	0.000186199	0.0255093	0.17518
KEGG_BASAL_CELL_CARCINOMA	0.0855708	-0.0282452	3.71948	0.00022708	0.0308828	-0.00924706
KEGG_ALANINE_ASPARTATE_AND_GLUTAMATE_METABOLISM	-0.113032	-0.0310517	-3.71757	0.000228749	0.0308828	-0.0160462
KEGG_GLYCOSYLPHOSPHATIDYLINOSITOL_GPI_ANCHOR_BIOSYNTHESIS	-0.116549	-0.0224033	-3.68942	0.000254697	0.0341294	-0.115769
KEGG_HUNTINGTONS_DISEASE	-0.101565	-0.0557792	-3.66248	0.000282097	0.0375189	-0.210515
KEGG_PATHOGENIC_ESCHERICHIA_COLI_INFECTION	0.101604	-0.0222675	3.6465	0.000299634	0.0395517	-0.266406
KEGG_B_CELL_RECEPTOR_SIGNALING_PATHWAY	0.0974264	0.0330667	3.5898	0.000370496	0.048535	-0.462908

## Sheet: S7
Table-S6: Prognostic analysis of 299 m6A phenotype-related genes using a univariate Cox regression model
Ensembl ID	Genesymbol	HR	HR.95L	HR.95H	pvalue
ENSG00000114270	COL7A1	1.58881	1.44348	1.74876	3.08e-21
ENSG00000175063	UBE2C	1.54918	1.39715	1.71775	9.92e-17
ENSG00000145040	UCN2	2.10996	1.7671	2.51936	1.55e-16
ENSG00000043355	ZIC2	1.82877	1.58449	2.11071	1.56e-16
ENSG00000163975	MELTF	1.47052	1.33605	1.61852	3.24e-15
ENSG00000115507	OTX1	2.29779	1.85932	2.83966	1.35e-14
ENSG00000137825	ITPKA	1.39192	1.27792	1.51609	3.32e-14
ENSG00000105048	TNNT1	1.31381	1.22331	1.411	6.62e-14
ENSG00000147509	RGS20	1.82349	1.55519	2.13808	1.38e-13
ENSG00000168779	SHOX2	1.68993	1.47048	1.94212	1.43e-13
ENSG00000153976	HS3ST3A1	1.48033	1.33374	1.64304	1.67e-13
ENSG00000182931	WFDC10B	1.63247	1.42916	1.86471	5.13e-13
ENSG00000258713	C20orf141	2.56283	1.98456	3.3096	5.46e-13
ENSG00000131668	BARX1	1.55084	1.36799	1.75812	7.11e-12
ENSG00000109705	NKX3-2	2.6343	1.99653	3.4758	7.46e-12
ENSG00000124116	WFDC3	1.63995	1.42207	1.89122	1.04e-11
ENSG00000171877	FRMD5	2.04282	1.66166	2.51142	1.21e-11
ENSG00000139800	ZIC5	2.1779	1.73315	2.73678	2.41e-11
ENSG00000017483	SLC38A5	1.25871	1.17544	1.34788	4.44e-11
ENSG00000178773	CPNE7	1.39495	1.26271	1.54103	5.74e-11
ENSG00000101282	RSPO4	1.52856	1.34606	1.73582	6.11e-11
ENSG00000196368	NUDT11	1.76654	1.48923	2.0955	6.54e-11
ENSG00000230453	ANKRD18B	2.96878	2.13579	4.12667	9.4e-11
ENSG00000046774	MAGEC2	1.50364	1.32812	1.70236	1.19e-10
ENSG00000258947	TUBB3	1.6391	1.40982	1.90567	1.3e-10
ENSG00000149948	HMGA2	1.47895	1.31111	1.66828	1.92e-10
ENSG00000173432	SAA1	1.13544	1.09173	1.18091	2.29e-10
ENSG00000166250	CLMP	1.31052	1.20525	1.42498	2.46e-10
ENSG00000073150	PANX2	1.37567	1.24571	1.51919	2.99e-10
ENSG00000119547	ONECUT2	1.77824	1.48579	2.12826	3.41e-10
ENSG00000133101	CCNA1	1.4966	1.31811	1.69925	4.89e-10
ENSG00000163395	IGFN1	1.28636	1.18657	1.39455	9.83e-10
ENSG00000265190	ANXA8	1.82287	1.50302	2.21078	1.06e-09
ENSG00000056998	GYG2	1.40644	1.25928	1.57079	1.46e-09
ENSG00000174564	IL20RB	1.19352	1.12693	1.26405	1.54e-09
ENSG00000183196	CHST6	2.42363	1.81629	3.23405	1.8e-09
ENSG00000084734	GCKR	1.48782	1.30577	1.69526	2.43e-09
ENSG00000145107	TM4SF19	1.48091	1.30074	1.68603	2.98e-09
ENSG00000055955	ITIH4	1.63474	1.38969	1.92299	3e-09
ENSG00000132429	POPDC3	1.54334	1.33672	1.7819	3.27e-09
ENSG00000102359	SRPX2	1.29123	1.18598	1.40581	3.81e-09
ENSG00000268223	ARL14EPL	1.84679	1.50521	2.26588	4.13e-09
ENSG00000160161	CILP2	1.37144	1.23393	1.52427	4.65e-09
ENSG00000122133	PAEP	1.16965	1.10981	1.23272	4.98e-09
ENSG00000160200	CBS	3.94676	2.47836	6.28517	7.34e-09
ENSG00000172548	NIPAL4	1.50422	1.30873	1.72891	9.04e-09
ENSG00000183876	ARSI	1.39934	1.24721	1.57003	1.05e-08
ENSG00000187714	SLC18A3	1.2231	1.14029	1.31193	1.8e-08
ENSG00000212724	KRTAP2-3	1.62077	1.36471	1.92488	3.71e-08
ENSG00000056291	NPFFR2	2.61201	1.85375	3.68045	4.07e-08
ENSG00000151224	MAT1A	1.25175	1.15475	1.35689	4.86e-08
ENSG00000134339	SAA2	1.1605	1.09964	1.22474	6.12e-08
ENSG00000095752	IL11	1.64841	1.375	1.97619	6.61e-08
ENSG00000198910	L1CAM	1.22312	1.1369	1.31587	6.64e-08
ENSG00000135447	PPP1R1A	1.17312	1.10703	1.24315	6.77e-08
ENSG00000189001	SBSN	1.36255	1.21748	1.52491	7.2e-08
ENSG00000168389	MFSD2A	1.30867	1.18658	1.44332	7.3e-08
ENSG00000139269	INHBE	1.29023	1.17556	1.41608	8.05e-08
ENSG00000132563	REEP2	1.4468	1.26314	1.65718	9.69e-08
ENSG00000159184	HOXB13	1.33986	1.20316	1.4921	9.91e-08
ENSG00000148965	SAA4	1.27839	1.167	1.40041	1.29e-07
ENSG00000188064	WNT7B	1.43001	1.25145	1.63406	1.47e-07
ENSG00000147689	FAM83A	1.85054	1.47038	2.32898	1.56e-07
ENSG00000196503	ARL9	1.7816	1.43514	2.2117	1.66e-07
ENSG00000140835	CHST4	2.21214	1.64092	2.98221	1.89e-07
ENSG00000255071	SAA2-SAA4	1.1677	1.1002	1.23935	3.34e-07
ENSG00000026559	KCNG1	1.58084	1.32345	1.88828	4.4e-07
ENSG00000129988	LBP	1.11882	1.07059	1.16924	5.94e-07
ENSG00000124107	SLPI	1.12696	1.07518	1.18122	6.32e-07
ENSG00000253368	TRNP1	1.25795	1.14921	1.37698	6.53e-07
ENSG00000187048	CYP4A11	0.871661	0.825703	0.920178	6.69e-07
ENSG00000131737	KRT34	1.53836	1.29282	1.83053	1.21e-06
ENSG00000214575	CPEB1	1.42057	1.23251	1.63732	1.26e-06
ENSG00000128591	FLNC	1.25223	1.14325	1.37161	1.29e-06
ENSG00000095596	CYP26A1	1.65413	1.34611	2.03263	1.69e-06
ENSG00000136327	NKX2-8	1.88801	1.45485	2.45012	1.76e-06
ENSG00000091482	SMPX	1.44901	1.24437	1.68731	1.8e-06
ENSG00000124493	GRM4	2.20673	1.59009	3.0625	2.2e-06
ENSG00000100170	SLC5A1	0.858438	0.805697	0.914633	2.38e-06
ENSG00000146678	IGFBP1	1.12038	1.06869	1.17458	2.4e-06
ENSG00000105376	ICAM5	1.54021	1.28561	1.84523	2.8e-06
ENSG00000137868	STRA6	1.51846	1.27464	1.80891	2.91e-06
ENSG00000130173	ANGPTL8	1.18329	1.10229	1.27025	3.29e-06
ENSG00000125965	GDF5	1.74247	1.37877	2.20209	3.33e-06
ENSG00000166736	HTR3A	1.5619	1.29394	1.88536	3.43e-06
ENSG00000154277	UCHL1	1.18291	1.10128	1.2706	4.14e-06
ENSG00000196136	SERPINA3	1.51868	1.26932	1.81702	4.97e-06
ENSG00000079393	DUSP13	2.45171	1.6646	3.61099	5.64e-06
ENSG00000179083	FAM133A	1.48666	1.2513	1.76629	6.5e-06
ENSG00000261649	GOLGA6L7P	1.29485	1.15728	1.44878	6.52e-06
ENSG00000099399	MAGEB2	1.38279	1.20092	1.5922	6.64e-06
ENSG00000182782	HCAR2	1.31018	1.16233	1.47682	9.76e-06
ENSG00000129910	CDH15	1.53398	1.2678	1.85604	1.08e-05
ENSG00000079689	SCGN	0.879554	0.830592	0.931403	1.12e-05
ENSG00000150551	LYPD1	1.33158	1.17076	1.51449	1.3e-05
ENSG00000256394	ASIC5	2.86528	1.78276	4.60513	1.37e-05
ENSG00000178919	FOXE1	1.54312	1.26769	1.8784	1.53e-05
ENSG00000109072	VTN	1.20185	1.10523	1.30691	1.71e-05
ENSG00000257017	HP	1.11211	1.05906	1.16781	2.04e-05
ENSG00000125820	NKX2-2	1.54073	1.26211	1.88086	2.16e-05
ENSG00000187123	LYPD6	1.41229	1.20159	1.65994	2.82e-05
ENSG00000137745	MMP13	1.30451	1.15114	1.47831	3.1e-05
ENSG00000213023	SYT3	1.52373	1.24985	1.85762	3.1e-05
ENSG00000169067	ACTBL2	1.81232	1.36955	2.39823	3.18e-05
ENSG00000152669	CCNO	1.28018	1.13952	1.43819	3.19e-05
ENSG00000144481	TRPM8	1.45159	1.21742	1.7308	3.3e-05
ENSG00000153132	CLGN	1.22527	1.1129	1.34898	3.48e-05
ENSG00000010438	PRSS3	1.30573	1.15078	1.48155	3.49e-05
ENSG00000234602	MCIDAS	1.89811	1.39924	2.57485	3.8e-05
ENSG00000170423	KRT78	2.21217	1.5134	3.23358	4.14e-05
ENSG00000169548	ZNF280A	2.43072	1.58425	3.72946	4.77e-05
ENSG00000235034	C19orf81	1.32674	1.15738	1.5209	4.96e-05
ENSG00000175832	ETV4	1.33108	1.15838	1.52951	5.49e-05
ENSG00000132693	CRP	1.16183	1.08011	1.24973	5.56e-05
ENSG00000171450	CDK5R2	1.3504	1.1633	1.56758	7.88e-05
ENSG00000182968	SOX1	1.63814	1.28028	2.09602	8.69e-05
ENSG00000144834	TAGLN3	1.34981	1.16111	1.56918	9.46e-05
ENSG00000157613	CREB3L1	1.2186	1.1019	1.34766	0.000118553
ENSG00000198963	RORB	1.61228	1.26222	2.05943	0.000130984
ENSG00000169213	RAB3B	1.39919	1.1747	1.66659	0.000166917
ENSG00000254656	RTL1	1.22769	1.10171	1.36807	0.000204385
ENSG00000047936	ROS1	1.44005	1.18677	1.74739	0.000219927
ENSG00000218336	TENM3	1.2503	1.10867	1.41001	0.000270681
ENSG00000214842	RAD51AP2	4.9744	2.09478	11.8125	0.000277198
ENSG00000264230	ANXA8L1	1.7244	1.28376	2.31629	0.000295674
ENSG00000128683	GAD1	1.22653	1.0925	1.37699	0.000543265
ENSG00000105989	WNT2	1.30532	1.12137	1.51944	0.000585986
ENSG00000105825	TFPI2	1.13857	1.0558	1.22782	0.000751858
ENSG00000162631	NTNG1	1.4687	1.17316	1.83868	0.000799005
ENSG00000261701	HPR	1.18564	1.07263	1.31055	0.000862298
ENSG00000187288	CIDEC	1.16308	1.06349	1.27199	0.000940204
ENSG00000166828	SCNN1G	1.12964	1.0506	1.21464	0.000989709
ENSG00000047597	XK	1.34373	1.12685	1.60235	0.001003
ENSG00000242366	UGT1A8	1.22577	1.08493	1.38489	0.0010793
ENSG00000268964	ERVV-2	1.28162	1.10385	1.48804	0.00112705
ENSG00000015520	NPC1L1	1.19842	1.07412	1.33711	0.00119636
ENSG00000136574	GATA4	1.27104	1.09802	1.47133	0.00131618
ENSG00000157851	DPYSL5	1.46573	1.15968	1.85255	0.00137592
ENSG00000101938	CHRDL1	1.1336	1.04789	1.22632	0.00177043
ENSG00000169594	BNC1	1.273	1.09159	1.48457	0.00209012
ENSG00000041353	RAB27B	1.25534	1.08575	1.45142	0.00213352
ENSG00000273259	AL049839.2	1.5865	1.17892	2.13498	0.00231554
ENSG00000171759	PAH	0.886228	0.819455	0.958443	0.00251145
ENSG00000092295	TGM1	1.16045	1.05289	1.279	0.00271307
ENSG00000164266	SPINK1	1.10216	1.03344	1.17545	0.0030643
ENSG00000159450	TCHH	1.26439	1.08111	1.47874	0.00332517
ENSG00000113600	C9	1.24943	1.07573	1.45118	0.00354814
ENSG00000100625	SIX4	1.28329	1.08452	1.51849	0.00367385
ENSG00000110244	APOA4	1.15678	1.04654	1.27862	0.0043679
ENSG00000269586	CT45A10	1.40869	1.1113	1.78566	0.00462239
ENSG00000169393	ELSPBP1	1.23442	1.06513	1.43061	0.00513638
ENSG00000075223	SEMA3C	1.14321	1.04023	1.25638	0.00545413
ENSG00000187957	DNER	1.12261	1.03467	1.21803	0.0054564
ENSG00000115008	IL1A	1.48641	1.12281	1.96775	0.00561773
ENSG00000182459	TEX19	1.41203	1.1046	1.80503	0.00588668
ENSG00000189325	C6orf222	1.35654	1.09102	1.68668	0.00607261
ENSG00000107807	TLX1	2.34928	1.27218	4.33832	0.0063492
ENSG00000027644	INSRR	1.38112	1.0948	1.74231	0.00644756
ENSG00000079112	CDH17	1.18312	1.04505	1.33942	0.00790931
ENSG00000170381	SEMA3E	1.22485	1.05174	1.42645	0.0090847
ENSG00000143469	SYT14	1.40785	1.08841	1.82105	0.0091836
ENSG00000186766	FOXI2	0.765153	0.624873	0.936926	0.00958483
ENSG00000188488	SERPINA5	1.10548	1.02446	1.19291	0.00981892
ENSG00000184601	C14orf180	0.862901	0.769562	0.967562	0.0115853
ENSG00000198054	DSCR8	1.26952	1.05162	1.53257	0.012996
ENSG00000129991	TNNI3	1.20618	1.03827	1.40124	0.0142432
ENSG00000143839	REN	0.93991	0.894268	0.98788	0.0146836
ENSG00000128422	KRT17	1.10046	1.01893	1.18852	0.0147915
ENSG00000103534	TMC5	1.1851	1.0327	1.35998	0.0156004
ENSG00000173898	SPTBN2	1.11072	1.01746	1.21253	0.0189367
ENSG00000186529	CYP4F3	1.1267	1.0198	1.24481	0.0190037
ENSG00000175928	LRRN1	1.23917	1.03252	1.48718	0.0212338
ENSG00000132821	VSTM2L	1.1203	1.01356	1.23827	0.0261741
ENSG00000167741	GGT6	0.856994	0.747445	0.982598	0.0269991
ENSG00000170819	BFSP2	1.39325	1.03368	1.8779	0.0294463
ENSG00000144119	C1QL2	1.39486	1.03352	1.88253	0.0295931
ENSG00000101323	HAO1	1.24601	1.02077	1.52095	0.0306173
ENSG00000118160	SLC8A2	1.37574	1.02937	1.83866	0.0311196
ENSG00000087510	TFAP2C	1.15091	1.01266	1.30804	0.0313473
ENSG00000055732	MCOLN3	0.832419	0.702481	0.986393	0.0341593
ENSG00000197632	SERPINB2	1.35459	1.02278	1.79404	0.0342541
ENSG00000188883	KLRG2	1.23666	1.01529	1.50629	0.0347916
ENSG00000188338	SLC38A3	1.15781	1.00827	1.32952	0.0378256
ENSG00000173237	C11orf86	1.09713	1.00499	1.19772	0.0383435
ENSG00000105369	CD79A	1.10364	1.00415	1.21298	0.0407671
ENSG00000172995	ARPP21	0.770767	0.599991	0.99015	0.041608
ENSG00000138823	MTTP	1.11738	1.00402	1.24355	0.0420031
ENSG00000139352	ASCL1	1.34669	1.01047	1.79478	0.0422487
ENSG00000170367	CST5	1.16066	1.00482	1.34066	0.0428359
ENSG00000007216	SLC13A2	0.829247	0.690174	0.996343	0.0456001
ENSG00000183287	CCBE1	1.12084	0.996098	1.26121	0.0580903
ENSG00000138696	BMPR1B	1.0971	0.996466	1.2079	0.0590458
ENSG00000099822	HCN2	1.10942	0.99528	1.23665	0.0608538
ENSG00000179292	TMEM151A	1.19731	0.991332	1.44608	0.0615418
ENSG00000148346	LCN2	1.07584	0.996202	1.16184	0.0624655
ENSG00000069206	ADAM7	1.22003	0.989661	1.50404	0.0625151
ENSG00000168621	GDNF	1.28661	0.985652	1.67945	0.0637873
ENSG00000236279	CLEC2L	1.53146	0.968605	2.42139	0.0682286
ENSG00000186510	CLCNKA	1.08016	0.994215	1.17354	0.0683327
ENSG00000214128	TMEM213	0.913647	0.828274	1.00782	0.0711814
ENSG00000110245	APOC3	1.08424	0.992539	1.18442	0.0728347
ENSG00000176532	PRR15	0.862514	0.73379	1.01382	0.0728864
ENSG00000156284	CLDN8	0.897965	0.795088	1.01415	0.0829918
ENSG00000165471	MBL2	1.2397	0.969981	1.58442	0.0860734
ENSG00000163207	IVL	1.24007	0.969734	1.58576	0.0863451
ENSG00000163898	LIPH	1.09561	0.985566	1.21795	0.0908833
ENSG00000143954	REG3G	1.09345	0.98445	1.21452	0.0954238
ENSG00000105929	ATP6V0A4	0.924187	0.842298	1.01404	0.0958133
ENSG00000146267	FAXC	1.20696	0.965673	1.50854	0.0983286
ENSG00000173702	MUC13	1.0891	0.982606	1.20714	0.104005
ENSG00000158296	SLC13A3	1.06703	0.986388	1.15426	0.105637
ENSG00000185290	NUPR2	0.891054	0.774783	1.02477	0.105891
ENSG00000095203	EPB41L4B	1.12656	0.973334	1.30391	0.110126
ENSG00000111319	SCNN1A	0.928525	0.847647	1.01712	0.110742
ENSG00000163331	DAPL1	1.09226	0.97901	1.2186	0.114079
ENSG00000114200	BCHE	1.09003	0.979439	1.21311	0.114257
ENSG00000165379	LRFN5	1.13297	0.969175	1.32446	0.11712
ENSG00000204936	CD177	1.10714	0.973681	1.2589	0.120423
ENSG00000206579	XKR4	1.45173	0.905258	2.32808	0.121888
ENSG00000183036	PCP4	0.921919	0.831432	1.02225	0.122979
ENSG00000167311	ART5	0.904881	0.795405	1.02942	0.128716
ENSG00000101144	BMP7	1.11642	0.965518	1.29091	0.137184
ENSG00000134363	FST	1.08125	0.971498	1.2034	0.152581
ENSG00000016402	IL20RA	1.19385	0.933635	1.5266	0.157794
ENSG00000143001	TMEM61	0.911461	0.800659	1.0376	0.160954
ENSG00000154975	CA10	0.793152	0.572076	1.09966	0.1645
ENSG00000113805	CNTN3	0.886844	0.748709	1.05046	0.164509
ENSG00000127561	SYNGR3	1.08803	0.963191	1.22904	0.174841
ENSG00000104892	KLC3	1.12828	0.941204	1.35253	0.191944
ENSG00000104413	ESRP1	0.924181	0.816395	1.0462	0.212697
ENSG00000153292	ADGRF1	0.909548	0.781975	1.05794	0.218862
ENSG00000118137	APOA1	1.08461	0.952573	1.23495	0.220076
ENSG00000178343	SHISA3	0.946456	0.865605	1.03486	0.227094
ENSG00000168703	WFDC12	1.12438	0.928905	1.36098	0.22894
ENSG00000115112	TFCP2L1	0.945242	0.860814	1.03795	0.238125
ENSG00000103089	FA2H	1.07009	0.955597	1.19829	0.240684
ENSG00000258691	AL355102.2	0.805378	0.557988	1.16245	0.247683
ENSG00000135480	KRT7	0.9519	0.874311	1.03637	0.255806
ENSG00000107447	DNTT	1.12898	0.912264	1.39719	0.264602
ENSG00000140481	CCDC33	1.48987	0.738296	3.00655	0.265719
ENSG00000183844	FAM3B	0.89965	0.746267	1.08456	0.267503
ENSG00000180251	SLC9A4	0.869807	0.678997	1.11424	0.269639
ENSG00000168269	FOXI1	0.949879	0.863462	1.04494	0.290691
ENSG00000168143	FAM83B	0.901934	0.741324	1.09734	0.302271
ENSG00000182107	TMEM30B	0.937575	0.828253	1.06133	0.308196
ENSG00000084674	APOB	1.04501	0.958704	1.13908	0.316821
ENSG00000173838	2020-03-10	1.106	0.901884	1.35631	0.333105
ENSG00000168907	PLA2G4F	0.93225	0.807108	1.07679	0.340127
ENSG00000150201	FXYD4	0.950671	0.856109	1.05568	0.34397
ENSG00000141639	MAPK4	0.87649	0.664261	1.15652	0.351362
ENSG00000198099	ADH4	1.08115	0.916553	1.27532	0.35447
ENSG00000176490	DIRAS1	1.06002	0.934602	1.20228	0.364267
ENSG00000108684	ASIC2	1.11811	0.874351	1.42984	0.373575
ENSG00000156564	LRFN2	1.23625	0.758749	2.01426	0.39449
ENSG00000166426	CRABP1	1.04865	0.937601	1.17285	0.405535
ENSG00000049283	EPN3	1.06009	0.915359	1.2277	0.435914
ENSG00000113073	SLC4A9	0.935276	0.786794	1.11178	0.448074
ENSG00000215644	GCGR	1.04145	0.932957	1.16255	0.469347
ENSG00000124479	NDP	1.0648	0.897408	1.26342	0.47181
ENSG00000158270	COLEC12	1.03987	0.933419	1.15846	0.477988
ENSG00000143355	LHX9	1.07619	0.869066	1.33267	0.500809
ENSG00000185274	WBSCR17	1.03046	0.941593	1.12771	0.514386
ENSG00000102678	FGF9	0.957985	0.841415	1.0907	0.516722
ENSG00000162891	IL20	1.22954	0.632732	2.38926	0.54211
ENSG00000150556	LYPD6B	1.05125	0.893876	1.23633	0.545805
ENSG00000137766	UNC13C	0.895252	0.622188	1.28816	0.551162
ENSG00000115616	SLC9A2	0.958298	0.825417	1.11257	0.575953
ENSG00000144227	NXPH2	0.945783	0.772583	1.15781	0.589116
ENSG00000101349	PAK5	0.909192	0.638691	1.29426	0.597241
ENSG00000105289	TJP3	1.03547	0.904203	1.18579	0.614304
ENSG00000137674	MMP20	1.13447	0.693168	1.85672	0.615714
ENSG00000147697	GSDMC	1.06132	0.839467	1.3418	0.6189
ENSG00000131910	NR0B2	0.971995	0.866713	1.09007	0.627249
ENSG00000066032	CTNNA2	0.933296	0.705445	1.23474	0.62881
ENSG00000118271	TTR	1.02852	0.915408	1.15561	0.63616
ENSG00000095713	CRTAC1	0.980396	0.893603	1.07562	0.67549
ENSG00000185156	MFSD6L	0.963301	0.791455	1.17246	0.709188
ENSG00000124249	KCNK15	1.02579	0.892332	1.1792	0.720338
ENSG00000243137	PSG4	0.962828	0.780385	1.18792	0.723786
ENSG00000165694	FRMD7	0.943518	0.673621	1.32155	0.735221
ENSG00000110680	CALCA	0.974885	0.831081	1.14357	0.754755
ENSG00000109205	ODAM	1.03838	0.817323	1.31923	0.757797
ENSG00000204941	PSG5	0.963216	0.756634	1.2262	0.760904
ENSG00000113889	KNG1	0.985695	0.893662	1.0872	0.77326
ENSG00000139144	PIK3C2G	0.961665	0.714987	1.29345	0.796035
ENSG00000237289	CKMT1B	1.02215	0.864176	1.209	0.798136
ENSG00000136155	SCEL	0.98253	0.809595	1.1924	0.858384
ENSG00000180176	TH	0.92177	0.373093	2.27734	0.859884
ENSG00000260802	LINC00890	0.987789	0.857258	1.13819	0.865085
ENSG00000100078	PLA2G3	0.961968	0.584528	1.58313	0.878756
ENSG00000177398	UMODL1	0.961546	0.54521	1.6958	0.892248
ENSG00000276289	KCNE1B	1.0816	0.315592	3.70688	0.900667
ENSG00000132677	RHBG	1.00534	0.903991	1.11805	0.92175
ENSG00000135346	CGA	1.01121	0.804818	1.27052	0.923778
ENSG00000100362	PVALB	0.996993	0.93427	1.06393	0.927629
ENSG00000169550	MUC15	1.00486	0.830978	1.21513	0.960103
ENSG00000130701	RBBP8NL	0.991871	0.687522	1.43095	0.965184
ENSG00000110203	FOLR3	0.998283	0.845095	1.17924	0.983872
ENSG00000167748	KLK1	1.00008	0.928455	1.07722	0.998409

## Sheet: S8
Table-S7: Spearman correlation between m6Ascore and other known signatures within the ccRCC
from	to	pvalue (< 0.001)	cor
Antigen processing machinery	m6Ascore	4.6054e-07	-0.220971
EMT-1	m6Ascore	0.000308179	-0.158873
EMT2	m6Ascore	0	0.504248
Pan-F-TBRS	m6Ascore	3.91859e-17	0.358791
Cell cycle	m6Ascore	3.77076e-15	0.339081
DNA replication	m6Ascore	3.51241e-08	0.241191
Homologous recombination	m6Ascore	1.91575e-06	0.208917
WNT target	m6Ascore	3.16013e-05	-0.182939
Cell cycle regulators	m6Ascore	1.06548e-10	0.281253
Pan-F-TBRS	CD8 T effector	9.8079e-05	0.17137
Cell cycle	CD8 T effector	1.23942e-06	0.212672
DNA replication	CD8 T effector	0.000746011	0.148563
Homologous recombination	CD8 T effector	4.63197e-05	0.179113
WNT target	CD8 T effector	0.000305109	-0.158986
Cell cycle regulators	CD8 T effector	2.48975e-12	0.304154
Fanconi anemia	Antigen processing machinery	0.000326038	0.158234
Cell cycle	Antigen processing machinery	0.000800657	0.14771
Homologous recombination	Antigen processing machinery	0.000669861	0.149853
Cell cycle regulators	Antigen processing machinery	2.99859e-14	0.328586
EMT-1	Immune checkpoint	0.000605906	-0.151046
Pan-F-TBRS	Immune checkpoint	0.000848894	0.147001
Angiogenesis	Immune checkpoint	1.37438e-05	-0.191016
Fanconi anemia	Immune checkpoint	0.000334136	0.157955
Cell cycle	Immune checkpoint	6.70532e-09	0.253323
DNA replication	Immune checkpoint	2.18304e-06	0.207778
Homologous recombination	Immune checkpoint	3.73213e-11	0.287859
WNT target	Immune checkpoint	1.47198e-07	-0.230157
Cell cycle regulators	Immune checkpoint	4.77633e-16	0.348745
EMT2	EMT-1	8.07536e-05	0.173408
EMT3	EMT-1	3.8697e-19	0.367434
Pan-F-TBRS	EMT-1	6.61888e-07	0.217967
Fanconi anemia	EMT-1	8.65822e-05	-0.17268
Nucleotide excision repair	EMT-1	8.3347e-06	-0.195712
DNA damage repair	EMT-1	1.42219e-11	-0.293787
Homologous recombination	EMT-1	4.18878e-06	-0.201997
Mismatch repair	EMT-1	0.00023088	-0.16211
WNT target	EMT-1	2.99675e-10	0.274568
Cell cycle regulators	EMT-1	4.4166e-05	-0.179594
Angiogenesis	EMT2	1.65073e-09	0.263132
DNA replication	EMT2	2.01537e-05	0.187344
Cell cycle regulators	EMT2	6.22395e-08	0.236849
Cell cycle	EMT3	4.40198e-05	0.179627
DNA damage repair	EMT3	2.02916e-06	-0.208416
Homologous recombination	EMT3	2.20695e-05	-0.186463
Mismatch repair	EMT3	0.000382175	-0.15642
Angiogenesis	Pan-F-TBRS	1.26377e-15	0.34431
Cell cycle	Pan-F-TBRS	9.54365e-11	0.281955
Nucleotide excision repair	Pan-F-TBRS	2.6115e-07	-0.225587
DNA damage repair	Pan-F-TBRS	3.35955e-08	-0.241525
Cell cycle regulators	Pan-F-TBRS	5.2928e-09	0.255006
KEGG_ANTIGEN_PROCESSING_AND_PRESENTATION	Pan-F-TBRS	6.44441e-05	0.175745
Fanconi anemia	Angiogenesis	0.000162426	-0.165972
DNA replication	Angiogenesis	5.12341e-11	-0.285882
Nucleotide excision repair	Angiogenesis	1.29091e-06	-0.212324
DNA damage repair	Angiogenesis	1.01745e-14	-0.334143
Mismatch repair	Angiogenesis	2.57754e-12	-0.303952
Cell cycle regulators	Fanconi anemia	2.74605e-13	0.316673
WNT target	Cell cycle	0.000146285	0.167105
KEGG_ANTIGEN_PROCESSING_AND_PRESENTATION	Cell cycle	2.48631e-09	0.260306
Cell cycle regulators	DNA replication	9.02371e-11	0.282311
KEGG_ANTIGEN_PROCESSING_AND_PRESENTATION	DNA replication	5.32317e-05	0.177702
Cell cycle regulators	DNA damage repair	1.10763e-08	0.249711
Cell cycle regulators	Mismatch repair	1.73637e-09	0.262785
KEGG_ANTIGEN_PROCESSING_AND_PRESENTATION	Cell cycle regulators	4.12334e-09	0.256771
