# Supplementary figures and images for: m6A modification patterns and tumor immune landscape in clear cell renal carcinoma
Source: PubMed Central journal article supplement — J Immunother Cancer. 2021 Feb 11;9(2):e001646. doi: 10.1136/jitc-2020-001646 (PMC7880120; doi:10.1136/jitc-2020-001646), 2021-02-11

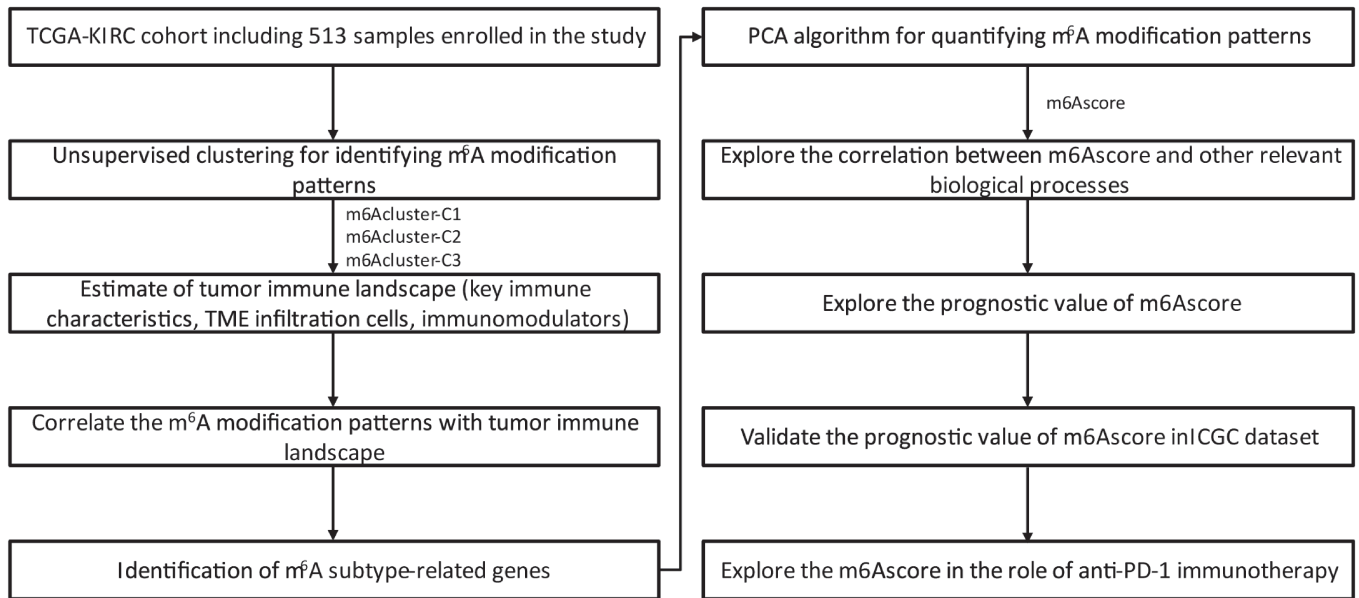

Supplement: jitc-2020-001646supp002.pdf [file jitc-2020-001646supp002.pdf]

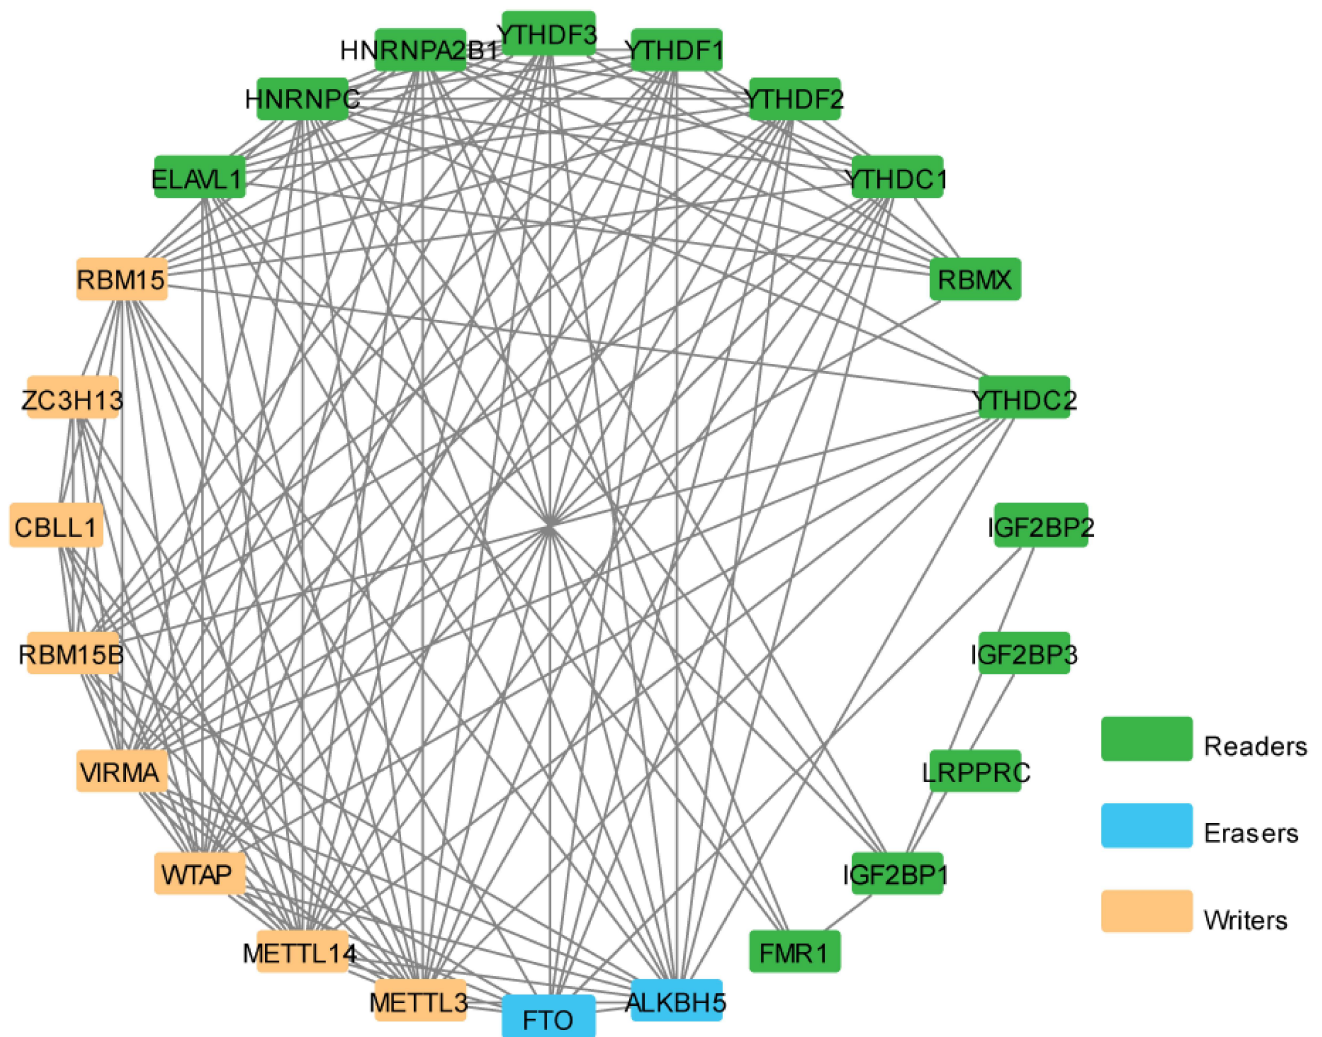

Supplement: jitc-2020-001646supp003.pdf [file jitc-2020-001646supp003.pdf]

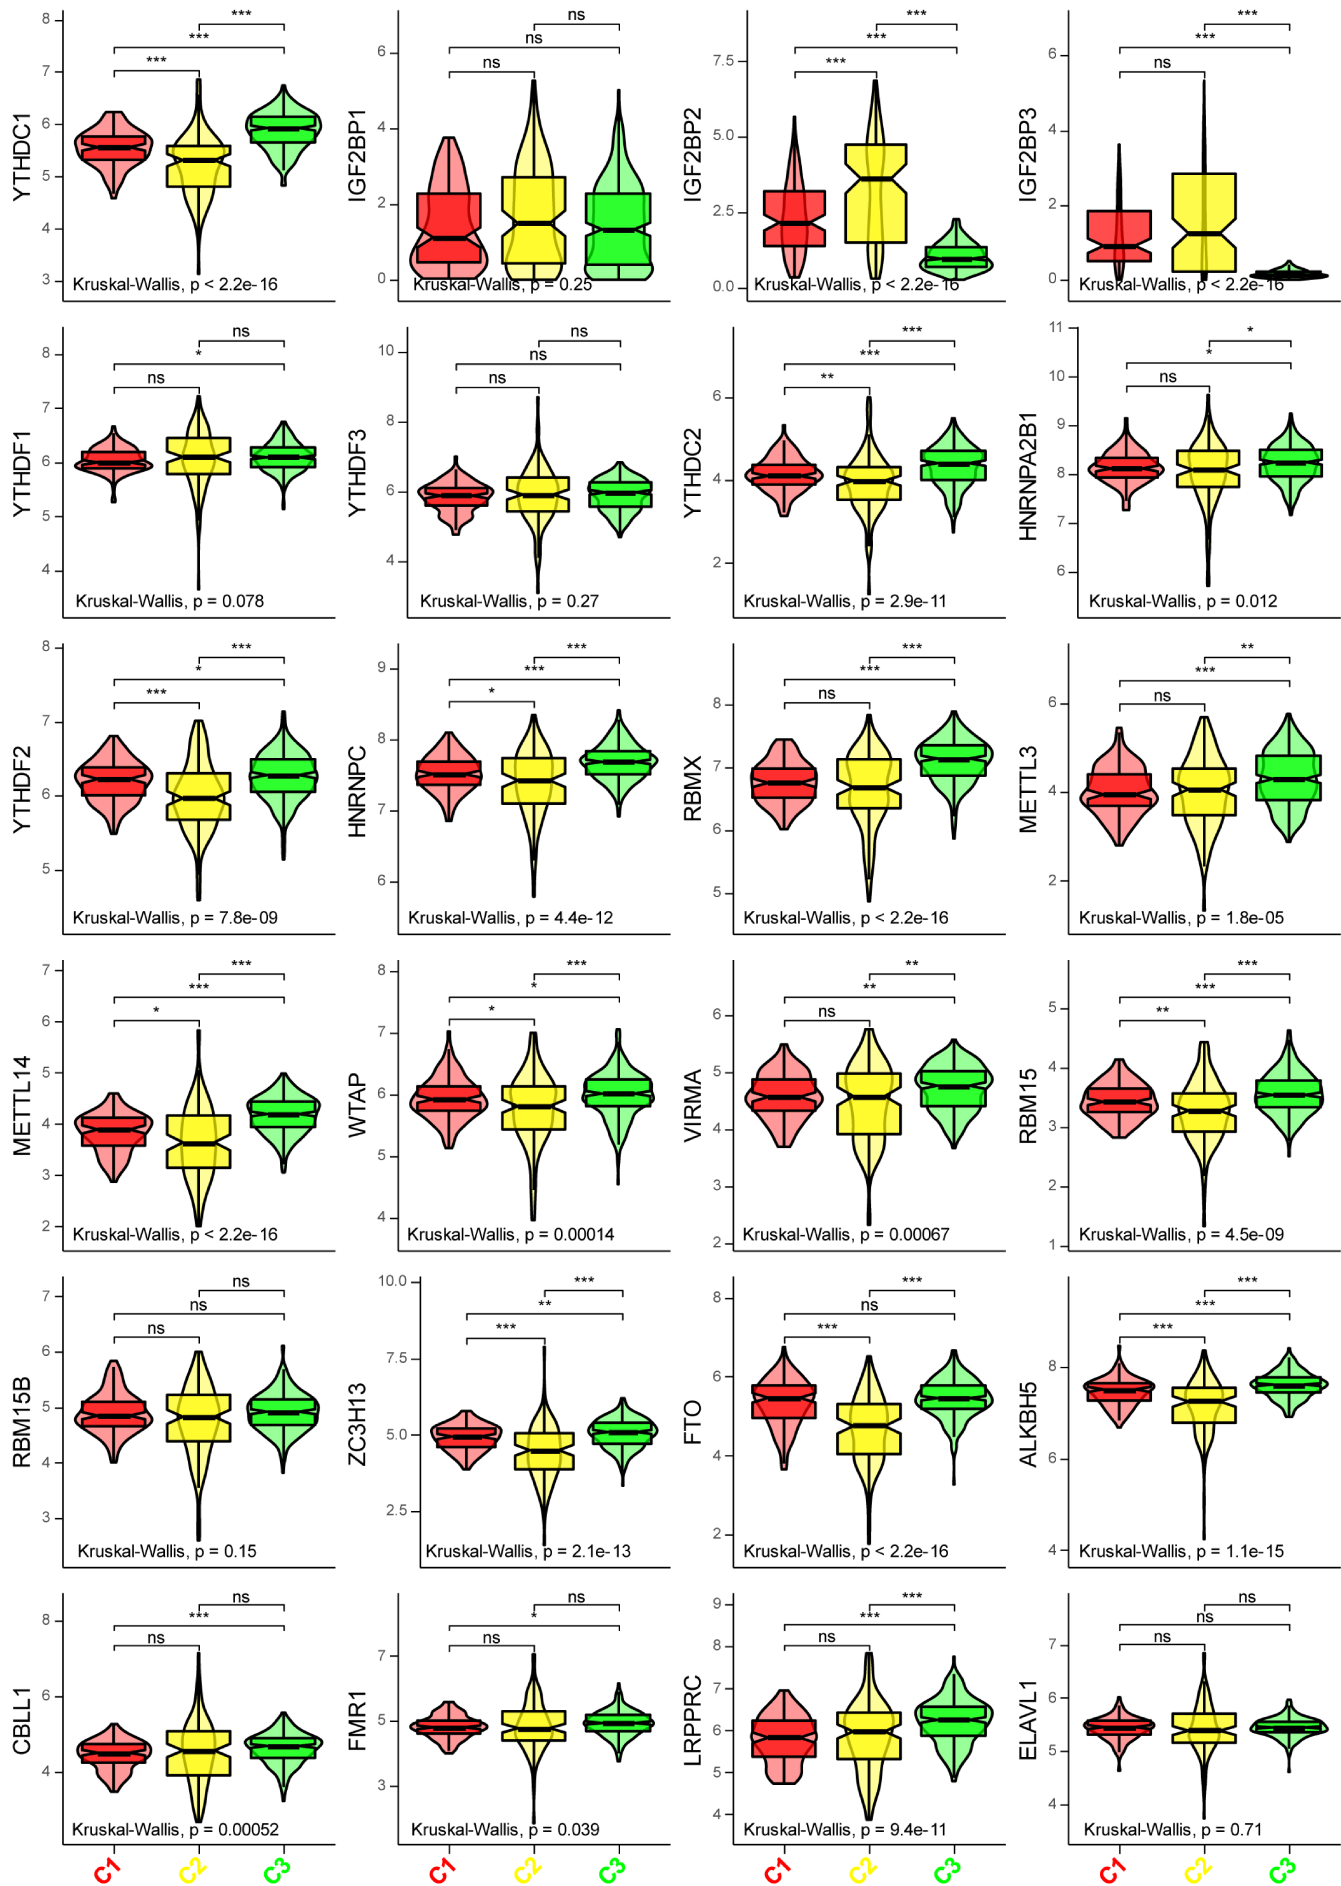

Supplement: jitc-2020-001646supp004.pdf [file jitc-2020-001646supp004.pdf]
